# Supplementary material for: Switching deformation mode and mechanisms during subduction of continental crust:a case study from Alpine Corsica
Source: Copernicus journal article supplement (doi:10.5194/se-2017-11), 2017-02-07
Supplement: Supplementary file [file se-2017-11-RC1-supplement.pdf]

1 **SWITCHING DEFORMATION MODE AND MECHANISMS DURING SUBDUCTION OF**  
2 **CONTINENTAL CRUST:**  
3 **A CASE STUDY FROM ALPINE CORSICA**

4  
5  
6  
7 Giancarlo Molli <sup>a</sup>, Luca Menegon <sup>b</sup>, Alessandro Malasoma <sup>c</sup>

8  
9  
10 a Dipartimento di Scienze della Terra, Università di Pisa, Via S. Maria, 53, Pisa 56126, Italy

11 b School of Geography, Earth and Environmental Sciences, Plymouth University, Plymouth, UK

12 c TLS Lab and Geoservices, Via Vecchia Fiorentina, 10, 56023 Cascina, Pisa Italy

13  
14 **ABSTRACT**

15  
16  
17 The switching in **deformation mode** (from distributed to localized) and mechanisms (viscous versus  
18 frictional) represent a relevant issue in the frame of crustal deformation, being also connected with  
19 the concept of the brittle-“ductile” transition and seismogenesis. In subduction environment,  
20 switching in deformation mode and mechanisms may be inferred along the subduction interface, in a  
21 transition zone between the highly coupled (seismogenic zone) and decoupled deeper aseismic  
22 domain (stable slip). On the other hand, the role of brittle precursors in nucleating crystal-plastic  
23 shear zones has received more and more consideration being now recognized as fundamental in the  
24 localization of deformation and shear zone development, thus representing a case in which switching  
25 deformation mode and mechanisms interact and relate to each other. This contribution analyzes an  
26 example of a crystal plastic shear zone localized by brittle precursor formed within a host granitic-  
27 protomylonite during deformation in subduction-related environment. The studied structures,  
28 possibly formed by transient instability associated with fluctuations of pore fluid pressure and  
29 episodic strain rate variations may be considered as a small scale example of fault behaviour  
30 associated with a cycle of interseismic creep and coseismic rupture or a new analogue for episodic  
31 tremors and slow slip structures. Our case-study represents, therefore, a fossil example of association  
32 of fault structures related with stick-slip strain accommodation during subduction of continental crust.

33  
34  
35  
36  
37 **Key words**

38  
39 Mixed mode of deformation, Brittle precursors, Shear zones, HP/LT mylonites, Subducted  
40 continental crust, slow slip events, pore fluid pressure

**Commentato [GV1]:** Not a proper abstract. Please rewrite by introducing the main issues that you have addressed and the RESULTS of your study. Then, draw a couple of conclusions highlighting the broad implications of your own work.

As it is now, it reads more like a general sum up of fundamental concepts underpinning our current understanding of cyclicality.

**Commentato [GV2]:** Deformation mode is, at least to me, a generic term that does not necessarily imply distributed and/or localised strain accommodation.

43 **Highlights**

44  
45  
46 We present a new case study on the role of brittle precursors in nucleating shear zone

47  
48 We described an HP/LT microscale ultramylonite developed by brittle precursors induced during  
49 deformation within an host HP/LT granitic mylonite;

50  
51 We related the studied structures with transient instability associated with fluctuations of pore fluid  
52 pressure and, possibly, with episodic strain rate variations

53  
54 We considered our case study a small scale example of fault behaviour associated with stick-slip  
55 strain accomodation of faults during subduction of continental crust.

56  
57

58  
59  
60  
61  
62  
63  
64  
65  
66  
67  
68  
69  
70  
71  
72  
73  
74  
75  
76  
77  
78  
79  
80  
81  
82  
83  
84  
85  
86  
87  
88  
89  
90

## ABSTRACT

The switching in deformation mode (from distributed to localized) and mechanisms (viscous versus frictional) represent a relevant issue in the frame of crustal deformation, being also connected with the concept of the brittle-“ductile” transition and seismogenesis. In subduction environment, switching in deformation mode and mechanisms may be inferred along the subduction interface, in a transition zone between the highly coupled (seismogenic zone) and decoupled deeper aseismic domain (stable slip). On the other hand, the role of brittle precursors in nucleating crystal-plastic shear zones has received more and more consideration being now recognized as fundamental in the localization of deformation and shear zone development, thus representing a case in which switching deformation mode and mechanisms interact and relate to each other. This contribution analyzes an example of a crystal plastic shear zone localized by brittle precursor formed within a host granitic-protomylonite during deformation in subduction-related environment. The studied structures, possibly formed by transient instability associated with fluctuations of pore fluid pressure and episodic strain rate variations may be considered as a small scale example of fault behaviour associated with a cycle of interseismic creep and coseismic rupture or a new analogue for episodic tremors and slow slip structures. Our case-study represents, therefore, a fossil example of association of fault structures related with stick-slip strain accomodation during subduction of continental crust.

### Key words

Mixed mode of deformation, Brittle precursors, Shear zones, HP/LT mylonites, subducted continental crust, slow slip events, pore fluid pressure

## INTRODUCTION

The study of the deformation fabric of fault rocks has been ~~the base to~~crucial for the development of a general conceptual model for crustal-scale fault zones (Sibson, 1977; Sibson, 1983; Scholz, 1988; Scholtz, 2002; Handy et al., 2007; Cooper et al. 2010; Platt and Behr, 2011). In this model, the increasing PT conditions determine the transition from a seismogenic frictional regime, dominated by pressure-sensitive deformation and involving cataclasis and frictional sliding, to a viscous regime (Rutter, 1986; Schimid and Handy, 1991; Handy and Brun, 2004), where dominantly aseismic, mainly

Commentato [GV3]: I guess this is what you meant? What other model otherwise?

97 crystal-plastic and continuous shearing is localized within mylonitic shear zones. In quartzo-  
98 feldspathic rocks, this transition is primarily determined by the temperature-related quartz response  
99 to changes of deviatoric stress, with dislocation creep becoming the principal deformation  
100 mechanism at  $T > 270$  °C (e.g. Stipp et al., 2002 and references).

101 Rock deformation experiments (Rutter, 1986; Shimamoto and Logan 1986; Bos and Spiers 2002;  
102 Scholz 2002) have shown that the shear strength of simulated faults at the brittle-viscous transition  
103 may depend on normal stress (~~as by faulting~~ dominated by cataclastic mechanisms) although strain  
104 is achieved through crystal plasticity and/or solution transfer. These results support the hypothesis  
105 that some mylonitic shear zones are produced by coupled frictional and viscous mechanisms under  
106 semi-brittle conditions (Shimamoto and Logan, 1986; Shimamoto, 1989; Chester, 1989; Scholz,  
107 2002; Pec et al., 2012 and references). ~~Studies-The experimental approach~~ on semi-brittle behaviour,  
108 ~~however, still~~ leaves several ~~open~~ questions ~~open regarding for~~ natural fault zones, ~~such as, for~~  
109 ~~example, the including~~ micromechanisms controlling bulk-rock deformation at the microscopic scale,  
110 the degree of interdependence of active deformation mechanisms, their cyclicity and the associated  
111 bulk rock style of deformation (Sibson, 1980; White and White, 1983; Takagi et al., 2000; Handy and  
112 Brun, 2004; Pec et al., 2012). A complex transitional behaviour involving mixed continuous and  
113 discontinuous, distributed vs. localized, and cyclic switching in deformation mechanisms over large  
114 variations in strain rates is inferred at the transition between frictional and viscous domains, a ~~zone~~  
115 depth interval in the crust which ~~includes~~ contains the typical hypocentres and rupture depths ~~offer~~  
116 large earthquakes in continental crust (Sibson, 1983; Kohlstedt et al., 1995; Scholz, 2002; Handy and  
117 Brun, 2004).

118 ~~In~~ convergent subduction settings, ~~similarly, this~~ transition zone is located between 10 and 35 km  
119 depth, depending on slab dip and thermal structure (i.e., between temperatures of 150 °C and 350–  
120 450 °C), and, along the subduction interface, s is recognized as the site of megathrust earthquake  
121 nucleation and concentrated postseismic afterslip, as well as the focus site of episodic tremor and  
122 slow slip events (Hacker et al., 2003; Vannucchi et al., 2008; Meneghini et al., 2010; Angiboust et  
123 al., 2012; Andersen et al., 2014; Hayman and Lavier, 2014; Fagereng et al., 2014; Angiboust et al.,  
124 2015).

125 The feedback between brittle and viscous deformation modes is relevant also for the mechanisms of  
126 shear zone nucleation, ~~so that~~ and fracturing has been proposed to be even a pre-requisite for the  
127 initiation of ductile shear zones in the lithosphere (Handy and Stünitz, 2002; Pennacchioni and  
128 Mancktelow, 2007; Füsseis and Handy, 2008, among others). Shear zones and style of strain  
129 accommodation in terms of distributed vs. localized deformation in granitoids have been described  
130 by different authors (Ramsay and Graham, 1970; Burg and Laurent 1978; Simpson, 1983; Gapais et

**Commentato [GV4]:**

**Commentato [GV5R4]:** I do not understand this "as by". Could you rephrase, please?

**Commentato [GV6]:** A mechanism is not macro or micro, it is only observed at different scales.

**Commentato [GV7]:** Why convergent and subduction? Any subduction without convergence?

131 al. 1987; Goncalves et al., 2016 and references therein). In this context, the role of brittle precursors  
132 in nucleating crystal-plastic shear zones has recently received ~~more—and—more~~significant  
133 consideration, ~~being—now~~ being widely recognized as ~~having—playing~~ a fundamental role in the  
134 localization process (Segall and Simpson, 1986; Mancktelow and Pennacchioni, 2005; Pennacchioni,  
135 2005; Pennacchioni and Mancktelow, 2007; Menegon and Pennacchioni, 2010; Pennacchioni and  
136 Zucchi 2012, among others).

137 ~~However—t~~These ~~studies, however, works~~ mostly deal with brittle precursors consisting of inherited  
138 structures, such as discontinuities already existing at the beginning of the viscous deformation history,  
139 as ~~in the the~~ cases of cooling joints, cataclasites and veins (e.g. Guermani and Pennacchioni, 1998;  
140 Pennacchioni and Mancktelow 2007); ~~and—most of these studieshem~~ consider deformation at shallow  
141 to intermediate crustal depths (Fusseis and Handy, 2008; Mazzoli et al., 2009; Molli et al., 2011),  
142 although case studies ~~framed—~~under conditions of upper amphibolite to granulite facies (White, 1996;  
143 Pennacchioni and Cesare, 1997; Kisters et al., 2000; Pittarello et al., 2013; Altenberger et al., 2013)  
144 and eclogite facies (Austrheim and Boundy, 1994; Austrheim, 2013 and references therein) were also  
145 investigated.

146 The case of deformation of crustal units and granitoids during subduction has only recently been ~~only~~  
147 recently—analysed in terms of preserved rock records of the paleo-seismic cycle and/or slow-slip  
148 phenomena (Angiboust et al., 2015). A well-documented study from the Dent Blanche Thrust in the  
149 Western Alps, for example, is framed in the hanging wall of an ancient subduction interface zone  
150 (Angiboust et al., 2014; 2015).

151 ~~On the contrary, o~~Our contribution integrates the existing literatue by analysinges a microscale  
152 example of brittle precursor of a crystal plastic shear zone derived from the footwall of a subduction  
153 interface in ambient blueschist-facies conditions, thus ~~representing—investigating an hitherto still not~~  
154 yet—undocumented or less documented—thoroughly studied caseeae—study (Molli et al., 2005; Molli  
155 2007).

156 By virtue of their deep origin, the analysed structures are ideally suited to contribute to the ongoing  
157 discussion on the deformation style and mechanisms associated with the broad spectrum of fault-slip  
158 behaviour (from seismic slip ~~to—through~~ stable aseismic creep, to episodic slow slip events and non-  
159 volcanic tremors) recorded by seismic and geodetic observations at active plate boundaries (e.g. Peng  
160 and Gomberg 2010; Beroza and Ide, 2011, and references therein). Slow slip events (i.e. fault slip  
161 events with slip rates in between coseismic rates~~slip~~ and aseismic creep, and generating equivalent  
162 seismic moments similar to large earthquakes) in subduction zones have been recorded in a depth  
163 interval that experiences temperatures between 250 and 650° C and pressures between 0.6 and 1.2  
164 GPa (Beroza and Ide, 2011), typically in areas of high Vp/Vs ratios suggestive of local high fluid

**Commentato [GV8]:** Give a short description of what your study encompassed. What techniques were used, on what in detail and to do what?

165 pressures. This locates slow slip events at the lower end of the seismogenic zone, at metamorphic  
166 conditions where the rheology is expected to be viscous or at the frictional-viscous transition.  
167 Accordingly, recent studies of shear zones exhumed from similar conditions along the subduction  
168 interface have suggested that coupled fracture and viscous flow, possibly associated with fluctuations  
169 ~~of~~ fluid pressure, can originate tremors and slow slips (e.g. Fagereng et al., 2014; Hayman and  
170 Lavier, 2014; Angiboust et al., 2015; Malatesta et al., 2017). Here we show that the HP brittle-viscous  
171 transition preserved in the Popolasca granitoids ~~of northern Corsica~~ can also be explained ~~by~~-with  
172 transient high fluid pressures triggering brittle deformation in an otherwise viscous regime, and  
173 discuss the related implications for fault-slip behaviours in subduction zones.

174

### 175 REGIONAL BACKGROUND AND GEOLOGICAL SETTING OF STUDIED SAMPLE

176

177

178 In Alpine-type orogens, the study of ~~the~~ meso- and microstructural record of exhumed subduction-  
179 related thrust zones and its interpretation in terms of subduction zone rheology and seismicity have  
180 received increasing attention since the end of ~~the~~ '90's (Stöckhert et al., 1999; Kuster and Stöckhert,  
181 1999). This subject has been developed ~~and explored~~ in particular in ~~the~~ Alpine Corsica (Austrheim  
182 and Andersen, 2004; Andersen and Austrheim, 2006; Healy et al., 2009; Andersen et al., 2014; Deseta  
183 et al., 2014a,b; Magott et al., 2016a,b) in oceanic units made up of peridotite, serpentinite, gabbro,  
184 basalt, calcareous and siliceous schist and marble exposed as remnants ~~of the lithosphere~~ of the  
185 Jurassic Piemonte- Liguria oceanic basin ~~lithosphere~~ and its pelagic sedimentary cover (Mattauer et  
186 al., 1981; Bezert and Caby, 1988; Jolivet et al., 1990; Molli, 2008; Vitale Brovarone et al., 2013).

187 These widespread occurrences and preservations of relicts of ~~exhumed~~ seismogenic-~~exhumed~~  
188 structures are mainly ~~related due~~ to the peculiar geologic history of Alpine Corsica, ~~which is~~  
189 connected with the development of the Alps/Apennine orogenic system (Molli and Malavieille, 2011;  
190 Guyedan et al., 2017; Beaudoin et al., in press). ~~The latter did not develop with the lacks of the~~  
191 continent-continent "hard collision"- related structures and ~~lacks the~~ thermal reworking observable  
192 ~~instead~~ in the Alps (e.g. Polino et al., 1995; Schmid et al., 1997; Berger and Busquet, 2008; Butler,  
193 2013; Rosenberg and Kissling, 2013; Carminati and Doglioni, 2014), ~~thus resulting and ain the~~ better  
194 preservation of the early stages of subduction-related structures and fabrics.

195 Corsica, therefore, represents a suitable natural laboratory for the investigation of ~~the~~ subduction-  
196 related processes in oceanic and continental crust, as firstly suggested by Mattauer et al. (1981) and  
197 Gibson and Horak (1984).

198 In Corsica, continental-derived units, i.e. units derived from the footwall of ~~the~~ ancient subduction  
199 interface zone, can be observed in three different structural positions (Fig.1), each ~~of them~~

Commentato [GV9]: Explain what you mean by Alpine Corsica for the not expert.

200 corresponding to a different peak metamorphism conditions (Tribuzio and Giacomini, 2004; Molli,  
201 2008; Vitale Brovarone et al., 2013);  
202 - the innermost slices (Serra di Pigno/Farinole units) interleaved with oceanic units show eclogite  
203 peak conditions at 1,5/1,8 GPa; 500 ± 50 °C;  
204 - the intermediate ones (e.g. the Tenda and Centuri units) are instead characterized by Upper  
205 Blueschist facies peak conditions at 0,9/1,1 GPa; 450± 50 °C;  
206 - the most external (e.g. Corte/Popolasca units) ~~show~~contain high pressure greenschist and/or  
207 blueschist facies peak assemblages developed at T =325/370°C, P = 0.75/0.85 GPa (Malasoma et al.,  
208 2006; Di Rosa et al., 2016).

209 These occurrences document the progressive underthrusting of these units down to different depths  
210 and their in-sequence contractional exhumation within an Alpine-age, east-dipping subduction  
211 system (Mattauer et al., 1981; Bezert and Caby, 1988; Jolivet et al., 1990; Garfagnoli et al., 2009;  
212 Molli and Malavieille, 2011; Maggi et al., 2012; Di Rosa et al., 2016; Guyedan et al., 2017).

213 The studied samples come from the external continental units (Molli, 2008; Molli and Malavieille,  
214 2011; Vitale Brovarone et al., 2013) of Alpine Corsica and, in more detail, from the Popolasca Unit  
215 (Bezert and Caby, 1988; Malasoma et al., 2006; Di Rosa et al., 2016). This unit is characterized by a  
216 pre-Mesozoic basement mainly formed by granitoids, a Permo-Mesozoic metasedimentary sequence  
217 and an Early-Eocene flysch (Fig. 1).

218 Blueschist assemblages in the unit have been described by regional studies (Bezert and Caby, 1988;  
219 Malasoma et al., 2006; Molli, 2008; Di Rosa et al., 2016) and can be observed in all suitable rock-  
220 types, ~~such as~~in metapelites from cover rocks ~~or~~in metabasic dykes and some of the granitoid suites  
221 from the basement. Peak metamorphism has been initially constrained ~~at to~~ 250/350°C, 0.4/0.55 GPa  
222 (Bezert and Caby, 1988) ~~and~~ more recently ~~better defined~~refined to 325/370 °C and 0.75/0.85  
223 GPa (Malasoma et al., 2006; Di Rosa et al., 2016). The prograde to peak pressure assemblage has  
224 been recently dated ~~in the range of~~to 45-36 Ma by Di Vincenzo et al., (2016).

225 The contributions of Malasoma et al., (2006) ~~and~~ Di Rosa et al., (2016) analysed the cartographic to  
226 mesoscopic-scale structural geometries of deformation in the area of the studied sample.

227 Superimposed foliations and fold structures are typical of the metasedimentary cover, with blueschist  
228 assemblages as relict fabrics. On the contrary, in basement rocks a main phase continuous foliation  
229 can be observed wrapping around undeformed granitoids. The main foliation is ~~either~~ associated  
230 ~~either~~ with blueschist or greenschist facies assemblages (Malasoma et al., 2005; Di Rosa et al., 2016;  
231 Di Vincenzo et al., 2016). Anastomosed networks of fault zones associated with subgreenschist facies  
232 assemblages overprints all previous structures and may be related to the activity of a major N/S  
233 trending transcurrent fault zone (Central Corsica Fault Zone) reworked by ~~normal kinematics~~an

Commentato [GV10]: Ar Ar? Specify, please.

234 ~~extensional phase active~~ during the Oligocene-Miocene in the frame of the rototranslation of the  
235 Corsica-Sardinia microblock and upper-plate extension associated with Apenninic subduction  
236 (Faccenna et al., 2004; Molli, 2008; Molli and Malavieille, 2011; Carminati and Doglioni, 2014;  
237 Guyedan et al, 2017).

## 240 GEOMETRY OF DEFORMATION AND MICROSTRUCTURES

242 The analysed sample (Fig.2) is a deformed granitoid of calcalkaline affinity suite (K-feldspar,  
243 plagioclase, quartz, biotite) well known in the Hercynian Corsica (Rossi et al., 2001). It shows  
244 contains a continuous foliation (Fig.2,3\_a,b) mainly defined by the shape preferred orientation of  
245 quartz, feldspars and biotite grains.

246 Shape anisotropy of quartz in the host protomylonite shows an aspect ratio around 0,37 (mean X/Z  
247 of 2,7), which indicates a shear strain  $\gamma$  of c.1 assuming simple shear deformation in simple shear.

248 Quartz shows-displays typical features of low temperature plasticity (Tullis et al., 2000; Stipp et al.,  
249 2002; Vermooij et al., 2006; Trepmann et al., 2007; Derez et al., 2015; Kjøl et al., 2015) (Fig 3), such  
250 as undulatory extinction, localized extinction bands (LEBs, following the terminology of Derez et al.,  
251 2015), typically forming conjugate sets, and up to 100  $\mu\text{m}$  thick intracrystalline bands of  
252 recrystallized grains (5-10  $\mu\text{m}$  in size). Bands of recrystallized grains occur parallel to the main  
253 foliation as well as in conjugate sets intersecting at ca.  $90^\circ$  and parallel to the conjugate sets of LEBs.  
254 Feldspars show local evidence of grain size reduction by microcracking and microfaulting (Fig.3)  
255 associated with K-feldspar breakdown to albite (by bulging recrystallization) (Fig.3), stilpnomelane  
256 and phengite. Thin needles of Na-amphibole (Fig.4) attest to the development of this fabric in HP/LT  
257 conditions as described below.

258  
259 The main foliation is cross-cut at high angle by a millimetre-thick localized zone of deformation (Fig.  
260 2, 5). This shows a sharp boundary, truncating flattened quartz and feldspar grains, which suggests;  
261 a feature suggesting its development as an unstable fracture (Schmid and Handy, 1991; Passchier and  
262 Trouw, 2011).

263 Three compositionally controlled domains can be recognized within the thin localized shear zone  
264 (Fig.2, 5):

265 Domain 1 is feldspar-dominated and shows microstructural features typical of a cataclastite (Fig.5a,c).  
266 Feldspar clasts (and quartz grains) reveal both displacive intragranular fractures and intergranular  
267 “stable” cracks (Atkinson, 1982; Schmid and Handy, 1991).

**Commentato [GV11]:** Nice microstructures, which, I believe, deserve a better documentation/description. See detailed comments below.

**Commentato [GV12]:** Why at  $90^\circ$ ? Are they really conjugate and we are in Tresca's conditions or, maybe, they are not true conjugates? Btw, not clear to me where these are on the microphotograph. Please highlight them.

**Commentato [GV13]:** Please show on Fig. 5 and explain better, not really clear.

**Commentato [GV14]:** How do these quartz grains look like? It is fundamental to document them. Are they deformed qtz? Recrystallised? They should be like qtz of the protomylonite. Can you exclude that they look like qtz of the proper mylonite, thus indicating their late cataclastic age?

**Commentato [GV15]:** What does this mean?

**Commentato [GV16]:**

**Commentato [GV17R16]:** I think the authors need to both document this better but also explain this better. All I can see in the provided figure is a thin cataclastic band, with a brown-red ground mass and white, poorly sorted and variably angular clasts. The resolution of the image is insufficient to follow the description.



268 Domain 2 is “phyllosilicate”-dominated (stilpnomelane and phengite) and shows microstructural  
269 features typical of a foliated-cataclasite/phyltonite (Fig. 5a,b). Asymmetric porphyroclasts and shear  
270 band systems characterize the phyllosilicate-rich parts of the shear zone.  
271 Domain 3 is a quartz-albite rich domain showing microstructural features typical of an ultramylonite.  
272 This is characterized by very fine recrystallized albite and quartz grains (5-10  $\mu\text{m}$  in size) (Fig. 5a,b;  
273 Fig. 6) with strong crystallographic preferred orientation (see below). A quartz porphyroclast shows  
274 a mean aspect ratio around 0,09 (mean X/Z of 11) which corresponds to a calculated shear strain  $\gamma$  of  
275 c. 3 At this shear strain the corresponding angle between the foliation and the shear zone boundary in  
276 simple shear is around  $15^\circ$ , which agrees with the mean orientation of the quartz porphyroclasts  
277 shape preferred orientation defining the ultramylonitic foliation (Fig. 6a,b,c). Syn to post-kinematic  
278 Na-amphibole (Fig. 6a) documents shearing in HP/LT metamorphic conditions, as illustrated here  
279 below.

## 281 MINERAL CHEMISTRY AND ESTIMATE OF METAMORPHIC PRESSURE- 282 TEMPERATURE (P-T) CONDITIONS

283  
284 Chemical analyses of coexisting minerals within the metamorphic assemblage (Tab.1) were obtained  
285 using a JEOL JXA-8600 electron microprobe, equipped with four wavelength-dispersive  
286 spectrometers, at the CNR - Istituto di Geoscienze e Georisorse, Firenze, Italy. Running conditions  
287 were 15 kV accelerating voltage and 10 nA beam current on a Faraday cage. Counting time for the  
288 determined elements ranged from 10 to 60 s at both peak and background. The Bence and Albee  
289 (1968) method was employed for the correction of all data. A number of synthetic and mineral  
290 standards were used for instrumental calibration.

291 **Amphibole.** Structural formulae were calculated assuming 23 oxygens, and the classification of  
292 Leake et al. (1997) was adopted. Site assignment and ferric iron contents were calculated using the  
293 scheme proposed by Schumacher in Leake et al. (1997). Because of the small sizes of the crystals  
294 (widths c.  $10\ \mu\text{m}$ ), it was not possible to make compositional traverses across individual crystals to  
295 detect intracrystalline variations in chemical composition, such as core-to-rim zonation. Thus, each  
296 analysis reported in Table 1 represents a different crystal. In the studied sample the Na-amphiboles  
297 are mostly riebeckite (Tab.1 and Fig. 4b) with low  $\text{Mg}/(\text{Mg}+\text{Fe}^{2+})$  ratio (0.13-0.21) and are  
298 characterized by Si contents close to the maximum of 8.0 apfu.

299 **Other minerals.** All analysed albites, of which structural formulae were calculated assuming 8  
300 oxygens, have composition close to the pure end-member. Stilpnomelane structural formulae were  
301 calculated assuming 24 oxygens and all Fe as divalent ( $\text{Fe}^{2+}$ ). Stilpnomelanes have Fe amounts

Commentato [GV18]: Label 5°. A is not shown on the figure.

Commentato [GV19]: Again, a better photographic documentation would help.

Commentato [GV20]: Please mark more clearly on Fig. 5°. I see not dashed square for domain 3 and can only guess that it is the area to the left of square of domain 2.

Commentato [GV21]: Please show on 5 where these photos are more or less from. Not obvious.

Commentato [GV22]: Unclear whether what you call here pclast is actually the ribbon of the caption to Figure 6? Please be consistent, hard to follow otherwise.

Commentato [GV23]: Why in the microphotograph do you show elongated objects with ratios up to 15? Why don't you stick to the same value and, therefore, object? Use the one giving you the maximum strain indication.

Commentato [GV24]: Why do you refer to a, b and c? Please, outline the sz boundaries, especially in a and c.

Commentato [GV25]: Are those parallel to the short ribbon objects? I would expect so, given that you use that figure to illustrate the angular relationships between the sz boundaries and the mylonitic foliation.

302 ranging from 1.86 to 2.91 apfu and Mg amounts ranging from 0.24 to 0.58 apfu. For K-feldspar and  
303 biotite porphyroclasts, structural formulae were calculated assuming respectively 8 and 22 oxygens.  
304 The analysed K-feldspars have composition close to the orthoclase pure end-member, with minor  
305 amounts of Na.

306  
307 The peak metamorphic mineral assemblage is characterised by Na-amphibole + phengite + quartz +  
308 albite + stilpnomelane. Na-amphibole is a typical mineral ~~related to~~ the blueschist facies and is  
309 indicative of HP/LT gradient metamorphism (e.g. Evans 1990; Schiffman & Day 1999 and  
310 references). The minimum temperature (T) and pressure (P) conditions of this mineral assemblage  
311 can be estimated using the reaction curves proposed by Schiffman & Day (1999) for the appearance  
312 of Na-amphibole (stability field of the blueschist facies); ~~meanwhile the~~ maximum temperature (T)  
313 conditions were ~~instead~~ constrained by the presence of stilpnomelane, as shown by the equilibrium:  
314  $\text{Stp} + \text{Phe} = \text{Bt} + \text{Chl} + \text{Qtz} + \text{W}$  (Massonne & Szpurka, 1997). Summing up all the available  
315 thermobarometric information, the metamorphic conditions can be estimated as temperature (T)  
316 around  $-320 \pm 50$  °C and pressure (P) > of 0.70 GPa (Fig.4c), consistent with those described by  
317 Malasoma *et al.* (2006) in metagranitic rocks from the area of our studied sample.

318  
319

320

321

### EBSD DATA

322

323 EBSD analysis of quartz was conducted with a Jeol 7001 FEG-SEM equipped with a NordlysMax  
324 EBSD detector (Oxford Instruments) at the Plymouth University Electron Microscopy Centre.  
325 Working conditions during acquisition of the EBSD patterns were 20 kV, 70° sample tilt and high  
326 vacuum. Thin sections were chemically polished with colloidal silica and carbon-coated before the  
327 analysis. EBSD patterns were acquired on rectangular grids with step size of 1 µm and 2 µm. EBSD  
328 patterns were acquired and indexed with the AZtec software and processed with Channel 5 software  
329 (Oxford Instruments). Raw EBSD data were processed to reduce data noise following the procedure  
330 tested by Prior *et al.* (2002) and Bestmann and Prior (2003). EBSD results are shown in form of  
331 Inverse Pole Figure map, pole figures (equal angle, lower hemisphere) of crystallographic axes and  
332 planes (<0001> c-axis, <11-20> a-axis, {10-10} prism {m}, {10-11} positive rhomb {r}, {01-11}  
333 negative rhomb {z}), misorientation profiles and plots of misorientation axis in sample coordinates.

334

335

### *Quartz in the host rock*

**Commentato [GV26]:** As mentioned in a comment in the intro, you should really introduce this component of the study earlier on. Why did you do EBSD? On what and aiming at what? Please introduce somewhere in the text, up to you where.

336 We analysed a monocrystalline quartz ribbon elongated parallel to the host-rock foliation and sharply  
337 cut by the thin localized shear zone. The quartz ribbon contains two nearly orthogonal sets of  
338 intracrystalline shear bands of recrystallized grains (Fig. 7a); one set is oriented at high angle ( $90^\circ \pm$   
339  $20^\circ$ , *set 1*) and one at low angle ( $\leq 20^\circ$ , *set 2*) to the host rock foliation (vertical in Fig. 7a). The average  
340 grain size of the recrystallized grains is  $5 \pm 2 \mu\text{m}$ . The host ribbon grain contains also fine localized  
341 extinction bands (up to  $20 \mu\text{m}$  thick) (LEBs: Derez et al., 2015) subparallel to the bands of  
342 recrystallized grains. Low-angle boundaries are ubiquitous in the ribbon; on EBSD maps they are  
343 typically straight, poorly connected, and subparallel to the bands of recrystallized grains (Fig. 7b).  
344 Some low-angle boundaries are connected to form subgrains of approximately the same size of the  
345 recrystallized grains. Subgrains occur with a higher frequency at the intersection between two sets of  
346 recrystallized bands, and in regions sandwiched between closely spaced ( $\leq 100 \mu\text{m}$ ) subparallel bands  
347 of recrystallized grains (Fig. 7b).

348 The c-axis of the ribbon is oriented near the pole to the host-rock foliation, i.e. in a position suitably  
349 oriented for the activation of the basal  $\langle a \rangle$  slip system of quartz (Fig. 7c). The c-axis orientation of  
350 the recrystallized grains in the intracrystalline bands is mostly spread out along the periphery of the  
351 pole figure, although some scattered grains have their c-axis in intermediate positions between the X  
352 and Y directions of the pole figures (Fig. 7d). Such an orientation suggests that the recrystallized  
353 grains have experienced a rotation around the Y-direction of finite strain (i.e. centre of the pole figure)  
354 from the host-grain orientation (e.g. Van Daalen et al., 1999; Menegon et al., 2011).

355 This is confirmed by the boundary trace analysis (Prior et al., 2002; Menegon et al., 2010) of the two  
356 main sets of straight low-angle boundaries defining localized extinction bands (parallel to bands of  
357 recrystallized grains), one running ENE-WSW (*subset 1*) and one running ca. N-S (*subset 2*) in Fig.  
358 7b. The dispersion paths of crystallographic directions on the pole figures of subset 1 (Fig. 7e)  
359 identifies  $\{m\}$  as the rotation axis, which lies very close to the centre of the pole figure. The pole to  
360 the prismatic plane  $\{m\}$  is the rotation axis associated with the basal  $\langle a \rangle$  and with the  $\{a\} \langle c \rangle$  slip  
361 system in quartz (e.g. Neumann, 2000), and, accordingly, subset 1 can be interpreted as a tilt boundary  
362 plane produced by the activity of the slip system basal  $\langle a \rangle$  (Fig. 7e) and containing the boundary  
363 trace of subset 1 and the rotation axis.

364 Subset 2 has a similar dispersion path as subset 1, with  $\{m\}$  as the identified rotation axis. However,  
365 in this case the boundary trace analysis is not consistent with a tilt boundary produced by the activity  
366 of the slip system basal  $\langle a \rangle$ , but could indicate the activity of the  $\{a\} \langle c \rangle$  slip system (Fig. 7f).  
367 However, activity of c-slip in quartz typically requires temperature in excess of  $600^\circ \text{C}$  (Kruhl, 1996;  
368 Zibra et al., 2010) and, therefore, appears unlikely in our samples. Moreover, misorientation profiles  
369 across low angle boundaries with a subset 2 orientation show abrupt misorientation jumps of up to  $6^\circ$

**Commentato [GV27]:** Justify why you classify these as shear bands. This is important to your model.

**Commentato [GV28]:** Indicate on the figure, please.

**Commentato [GV29]:** What ribbon? The host crystal?

**Commentato [GV30]:** If I may suggest it, fig. 7<sup>a</sup> and b deserve to be bigger. Some of the described features are nearly invisible at the current figure size. I suggest to split figure 7 into 2 parts.

370 (profiles 2 and 3 in Figs. 7b and 7g), as opposed to a gradual accumulation of misorientation towards  
371 low-angle boundaries with a subset 1 orientation (profile 1 in Figs. 7b and 7g). Thus, the low-angle  
372 boundaries with a subset 2 orientation could represent microcracks subparallel to the basal planes  
373 (e.g. Kjølil et al., 2015) that localized rigid body rotation of fragments around the Y-direction (e.g.  
374 Trepmann et al., 2007; Menegon et al., 2013). The rotation around Y of (1) the crystallographic  
375 directions of the host grain and (2) the recrystallized grains (in this case for large misorientation >  
376 10°) is confirmed by the plots of the misorientation axis in sample coordinates (Fig. 2).

377

378

379

#### *Quartz in the localized shear zone*

380 We analysed polycrystalline ribbons of recrystallized grains from domain 3 of the localized shear  
381 zone (Fig. 8a). The c-axis orientation of the recrystallized grains defines an inclined type-I crossed  
382 girdle synthetically oriented with respect to the bulk shear sense of the shear zone (Fig. 8b). The c-  
383 axes are preferentially clustered near the pole to the shear zone boundary, i.e. in an orientation suitably  
384 oriented for the activity of the basal <a> slip system. The average grain size of the recrystallized  
385 grains in domain 3 is 6±2 µm.

386

387

#### **ULTRAMYLONITE: PALEOPIEZOMETRY, FLOW STRESS AND STRAIN RATE**

389

390 The microstructure and the crystallographic preferred orientation of quartz indicate that quartz in the  
391 protomylonite and ultramylonite deformed by dislocation creep (concomitant with microcracking in  
392 the **protomylonite**) and recrystallized to a fine-grained aggregate. Thus, the rheology and the flow  
393 stress in the ultramylonite can be evaluated extrapolating experimentally calibrated flow laws of  
394 quartz to the deformation conditions.

395 The rheology of quartz deforming by dislocation creep is generally described in terms of a  
396 power-law equation:

$$\dot{\epsilon} = A f_{H_2O}^m e^{(-Q/RT)} \sigma^n \quad (1)$$

398 Where  $\dot{\epsilon}$  is the strain rate,  $f_{H_2O}$  is the water fugacity (raised to the power of m), Q is the activation  
399 energy, R is the universal gas constant, T is the temperature,  $\sigma$  is the differential stress, and n is the  
400 stress exponent. We used the theoretical dislocation creep flow law of Hirth et al. (2001), which has  
401 derived a linear dependence of strain rate on the water fugacity (m=1) and a stress exponent of 4. A  
402 water fugacity of 172 MPa is calculated from the water fugacity coefficient reported in Tödheide

**Commentato [GV31]:** Ok, why concomitant? What do you consider as convincing evidence that the two processes are coeval? Not mentioned so far, nor demonstrated. Please, elaborate better.

403 (1972) at T=350° C, P=0.8 GPa.

404 The paleostress (assuming steady-state flow at the time of viscous deformation) can be determined  
405 by recrystallized quartz grain size paleopiezometer (e.g. Stipp & Tullis, 2003), which have been  
406 calibrated in the form:  $\Delta\sigma = B D^{-X}$ , where  $\Delta\sigma$  is the steady state differential stress ( $\sigma_1 - \sigma_3$ ), D is the  
407 recrystallized grain size and B and X are empirical constants. Using the recrystallized grain size  
408 piezometer of quartz calibrated by Stipp and Tullis (2003), a recrystallized grain size of 5-10  $\mu\text{m}$   
409 indicates differential stress in the range of 110-190 MPa. Extrapolation of the flow law of Hirth et al.  
410 (2001) yields a strain rate in the range of  $7.6 * 10^{-13} - 6.2 * 10^{-12} \text{ sec}^{-1}$  in the ultramylonite at the  
411 estimated deformation temperature of 350° C.

412

## 413 DISCUSSION AND CONCLUSION

414

### 415 *Viscous-brittle-viscous deformation under HP/LT conditions*

416

417 The analysed example documents a switch in deformation mode and mechanisms within an HP/LT  
418 fault zone. On the base of overprinting relationships and microstructural features the following  
419 deformation sequence may be suggested: stage (1), associated with a distributed deformation and  
420 development of a protomylonitic foliation in the granitoid by quartz low temperature plasticity,  
421 microfracturing, and albite neo-crystallization from K-feldspar porphyroclasts (Fitzgerald and  
422 Stunitz, [1993], ~~has been~~ was, followed by stage (2), in which localized deformation by brittle  
423 fracturing formed a millimeter-thick cataclasite, which acted as a precursor for (3) localization of  
424 viscous deformation and ultramylonite development. The synkinematic and postkinematic growth of  
425 Na-amphibole in the host rock foliation and in localized ultramylonite indicates that the entire  
426 deformation sequence occurred at HP/LT conditions (ca. 350°C at  $\geq 0.7\text{GPa}$ ), corresponding to a  
427 depth of 23-30 km in the subduction channel.

428 The estimated P, T conditions are consistent with low-T plasticity regime in quartz (Stipp et al., 2002;  
429 Derez et al., 2015 and refs therein). Accordingly, the deformation microstructures of quartz produced  
430 during stage (1) in the host rock appear to be the product of the competition between dislocation  
431 activity and fracturing. Localized extinction bands at high angle to the host rock foliation (subset 1  
432 in Fig. 7b) are consistent with the activity of the basal <a> slip system, whereas localized extinction  
433 bands subparallel to the host-rock foliation (subset 2 in Fig. 7b) are interpreted as fractures subparallel  
434 to the basal plane, as previously observed by Kjøl et al. (2015). Some localized extinction bands  
435 (especially those with a subset 2 orientation, see Fig. 7b) contain isolated small new grains that are  
436 considerably smaller than the average grain size in the recrystallized bands, and that are only slightly

Formattato: Evidenziato

Commentato [GV32]: Very much possible, but what exactly is the evidence that low-T plasticity is coeval with microfracturing? Not necessarily obvious.

Formattato: Evidenziato

Formattato: Evidenziato

Formattato: Evidenziato

Commentato [GV33]: Clasts therein are only of KFs? No deformed qtz aggregates? Can you exclude that cataclasis locally also postdates mylonitisation?

Formattato: Evidenziato

Commentato [GV34]: This is crucial to the story! I need to be convinced that this IS the case. Can you please list and better explain the observations and evidence that support this reconstruction? Obviously the cataclasite postdates the protomylonitic, discordant foliation. But what is the time/geometric/dynamic relationship among all the microfracturing episodes you propose?

I miss something in your explanation.

Formattato: Evidenziato

Formattato: Evidenziato

437 misoriented with respect to the host grain. Moreover, the high-angle boundaries in such localized  
438 extinction bands are not always fully connected to define entire new grains. Together with the abrupt  
439 misorientation jumps (Fig. 7g), these observations further suggest that localized extinction bands with  
440 a subset 2 orientation represent fractured domains in which the fragments have rotated passively and  
441 sealed together, as proposed by e.g. Derez et al. (2015).

442 Despite the local fracturing of the host grain, deformation of the recrystallized grains in the conjugate  
443 intracrystalline bands involved dislocation activity, as indicated by the cluster of misorientation axis  
444 around the prism {m} for low misorientations (compare Fig. 7h with 7d). This is consistent with the  
445 local activity of the basal <a> slip system in the recrystallized bands, as also indicated by the CPO of  
446 the recrystallized grains in the bands at high angle to the host rock foliation (Fig. 7d).

447 The type-I crossed girdle c-axis CPO of quartz in the ultramylonite suggests the concomitant activity  
448 of basal <a>, rhomb <a> and prims <a> slip systems in the recrystallized ribbons (Fig. 8). The grain  
449 size of recrystallized quartz in the ultramylonites is in the same range (5-10 μm) as in the  
450 intracrystalline bands in the host rock. This suggests that 5-10 μm represents the equilibrium grain  
451 size with the flow stress (estimated in the range of 110-190 MPa with recrystallized grain size  
452 piezometry) during viscous deformation before and after the transient brittle event of stage (2).

453 During stage (2) the development of cataclasis and related dilatancy resulted in an increase of  
454 permeability and thus facilitated fluid access and fluid mobility in the shear zone. This enhanced  
455 mineral transformations as testified to by modal enrichment of stilpnomelane (by biotite breakdown)  
456 and Na-amphibole in the ultramylonite.

457 Therefore, the observed structures witness a change in deformation style (from distributed to localized  
458 strain in brittle precursor), and a switch in the dominant deformation mechanism (from low T  
459 plasticity in the host rock to cataclasis and back to crystal plasticity in the ultramylonite), which  
460 occurred at the footwall of the subduction interface at temperature conditions typical of the  
461 brittle/viscous transition in quartz/feldspathic rocks.

462 Finally, the transition from stage (2) and stage (3) is consistent with the general observation that  
463 nucleation of localized ductile shear zones requires the presence of a planar compositional or  
464 structural precursor (e.g. Pennacchioni and Zucchi, 2012, and references therein). The example from  
465 the Popolasca granite demonstrates that (i) nucleation on brittle precursors also occurs under HP/LT  
466 conditions in the subduction channel, and (ii) the brittle precursors are not necessarily inherited from  
467 an earlier deformation event, but can be the manifestation of switches in deformation mode in the  
468 footwall of the subduction interface.

469  
470

**Commentato [GV35]:** Really?

**Commentato [GV36]:** True, but how representative of the bulk flow stress is the grain size of the recrystallised grains (or better, nucleated) within the intracrystalline bands? What is the role of the initial aperture of the precursor microcracks? Would that not be a limiting factor to further grain growth at least until other solution/precipitation mechanisms potentially could take over? This aspect should be at least discussed.

**Commentato [GV37]:** See my comments above.

471  
472 ***Significance of the switch in deformation mode and implications for fault-slip behaviours in***  
473 ***subduction zones***  
474

475 We interpreted the inferred deformation sequence and structures as the result of transient instabilities  
476 (Sibson, 1980; White, 1996; Handy and Brun, 2004) possibly representative of mixed fault-slip  
477 behaviours at seismogenic depth in the subduction channel. We have estimated the conditions  
478 resulting in the transient brittle event during stage (2) under the following assumptions and  
479 approximations:

- 480 1. The coefficient of internal friction,  $\mu_i$ , is generally between 0.5 and 1.0 in intact rocks (Sibson,  
481 1985). We considered  $\mu_i = 0.6$  in the failure envelope for the intact Popolasca granitoid.
- 482 2. We used a cohesive strength of 35 MPa as representative for granitoids (Amitrano and  
483 Schmittbuhl, 2002), with a resulting tensile strength of 17.5 MPa.
- 484 3. We assumed an Andersonian stress field and a thrusting regime. The effective vertical stress  
485  $\sigma'_v$  corresponds to the effective minimum principal stress  $\sigma'_3 = \sigma_3 - P_f$ , where  $P_f$  is the pore  
486 fluid pressure. We considered a hydrostatic pore pressure ( $\lambda = 0.4$ ,  $P_f = 320$  MPa for  $\sigma_3 = 800$   
487 MPa) during the formation of the gneissic foliation in the host rock.
- 488 4. We assumed a differential stress of 110-190 MPa during viscous flow of the granitoid prior  
489 to brittle failure at  $\sigma'_v = 480$  MPa, as derived from the recrystallized grain size piezometry in  
490 the protomylonite.

491 The results of our analysis are shown in Fig. 9a. For brittle failure, it is necessary to invoke high  
492 differential stresses (of the order of 1.1 GPa assuming a hydrostatic pore fluid pressure), or higher  
493 fluid pressure (Fig. 9a). Differential stresses in excess of 1 GPa have been associated with  
494 intermediate depth (50-300 km) earthquakes in the subduction channel (e.g. John et al., 2009), and  
495 are expected to result in extensive development of pseudotachylytes in granitoid rocks (e.g.  
496 Austrheim 2013 and references therein), which, on the contrary, have not been observed in the sample  
497 studied here.

498 For the differential stress range and the vertical stress considered here, brittle failure requires  
499 (sub)lithostathic fluid pressure ( $0.96 < \lambda < 1$ , Fig. 9). The strength envelope plotted for pore fluid  
500 pressure between 0.98 and 0.94 and for a strain rate of  $10^{-12} \text{ s}^{-1}$  (Fig. 9b) suggests that viscous  
501 deformation at the estimated depth range (23-30 km) is only possible for pore fluid pressure  $\leq 0.94$ ,  
502 otherwise brittle deformation is expected to occur. Thus, under the assumptions listed above, our  
503 analysis indicates that local fluctuations in pore fluid pressure can explain the cyclic viscous-brittle-  
504 viscous deformation switch. However, despite the synkinematic growth of hydrous minerals in the



505 cataclasite and the high pore fluid pressure required at failure, there is no evidence of macroscopic  
506 veining or hybrid fractures in the samples. Our analysis is consistent with this observation, in that  
507 failure occurs entirely in the shear fractures field and not in the (hybrid) shear extension fractures  
508 field (Fig. 9a).

509 Drawing from the results shown in Figs. 9a,b and using concepts and inferences coming from modern  
510 studies of convergent subduction system (e.g. Ozowa et al., 2002; Fu and Freymuller, 2013; Bedford  
511 et al., 2013), we may suggest the following deformation path (Fig.10) for the structural features of  
512 our analysed sample. A first stage of distributed deformation (stage 1) may be associated with large  
513 scale anastomosed shear zone development and aseismic creep; ~~subsequently, then,~~ following  
514 Angiboust et al. (2015), two possible deformation scenario and slip patterns may be envisaged: (a)  
515 propagation at seismic rate of microrupture followed by afterslip or (b) slow slip phenomena in an  
516 aseismically creeping crust. In the first case, a transient strain rate increase associated with brittle  
517 fracturing would represent the deep response of the transition zone to a specific stage of the seismic  
518 cycle taking place higher up along the seismogenic portion of the subduction interface (Fig.10c,  
519 scenario 1) or in less deformed domains acting as local stress raisers nearby (Fig.10c, scenario 2).  
520 Cataclastic deformation would then correlate with coseismic to postseismic deformation higher up  
521 along the interface. In that case, the mylonitization of the brittle precursor would be the record of  
522 subsequent interseismic deformation at lower strain rates, taking place in the time frame between two  
523 earthquakes.

524 In the second case (Fig.10d), the transient highs in strain rates ~~related expressed by~~ brittle fracturing  
525 and cataclasis could be the field evidence of deformation associated with slow slip events (SSEs) or  
526 other transient slips, generally localized along the subduction interface at this depth range itself (e.g.,  
527 Shelly et al., 2006; Fagereng et al., 2014). We are aware that the mechanism(s) of SSEs initiation are  
528 still poorly understood, and that stress/strain rate perturbations triggered by an earthquake nearby  
529 followed by postseismic slip and interseismic creep is an equally feasible mechanism to explain the  
530 deformation sequence recorded in our sample. However, our preferred interpretation is that the  
531 transient brittle deformation recorded in our studied sample is the manifestation of a slow slip event,  
532 for the following reasons: (1) subduction interface SSEs typically occur at the downdip transition  
533 from stick-slip behaviour to aseismic creep (e.g. Wallace and Beavan, 2010), and, in granitoid rocks,  
534 this transition is expected to occur at the T range of deformation of our case-study, as witnessed by  
535 the deformation microstructures of quartz and feldspar in the host protomylonite; (2) SSEs are often  
536 related to high pore fluid pressure (e.g. Liu and Rice, 2007).

537 Whatever the actual process triggering brittle deformation was, we want to emphasize that detailed  
538 microstructural studies of exhumed shear zones are a valuable complement to the geodetic,

**Commentato [GV38]:** Where is this described? If I am not mistaken, you only described K-Fs and qtz...

**Commentato [GV39]:** Causing the protomylonitic texture of the sample....



539 seismological and experimental studies that aim to unravel the complex fault-slip behaviours at the  
540 subduction interface. In this context, our studied sample represents a new and still not yet documented  
541 case study of brittle-viscous transition zone and processes in subducted continental crust. Moreover,  
542 our study reinforces the concept that the external zones of Alpine Corsica represent an unique target  
543 to document and better understand footwall deformation structures and processes related with HP/LT  
544 continental subduction.

545

546

547

548

549

550 Altenberger, U., Prosser, G., Grande, A., Günter, C., and Langone, A.: A seismogenic zone in the  
551 deep crust indicated by pseudotachylytes and ultramylonites in granulite-facies rocks of Calabria  
552 (Southern Italy), *Contributions to Mineralogy and Petrology*, 166, 975-994, 2013.

553

554 Amitrano, D., and Schmittbuhl, J.: Fracture roughness and gouge distribution of a granite shear band,  
555 *Journal of Geophysical Research*, 107, B12, doi:10.1029/2002JB001761, 2002.

556

557 Andersen, T.B., and Austrheim, H.: Fossil earthquakes recorded by pseudotachylytes in mantle  
558 peridotites from the Alpine subduction complex of Corsica. *Earth and Planetary Science Letters* 242,  
559 58-72, 2006

560

561 Andersen, T.B., Austrheim, H., Deseta, N., Silkoset, P., and Ashwal, L.D.: Large subduction  
562 earthquakes along the fossil Moho in Alpine Corsica. *Geology*, 42, 395-398, 10.1130/G35345.1,  
563 2014.

564

565 Angiboust, S., Glodny, J., Oncken, O., Chopin, C. In search of transient subduction interfaces in the  
566 Dent Blanche–Sesia Tectonic System (W. Alps), *Lithos*, 205, 298-321, 2014.

567

568 Angiboust, S., Kirsch, J., Oncken, O., Glodny, J., Monié, P., and Rybacki, E.: Probing the transition  
569 between seismically coupled and decoupled segments along an ancient subduction interface.  
570 *Geochemistry Geophysics Geosystems*, 16, 1905-1922, doi:10.1002/2015GC005776, 2015.

571

572 Atkinson, B.K.: Subcritical crack propagation in rocks: theory, experimental result and applications.  
573 *Journal of Structural Geology*, 4: 41–56, 1982.

574

575 Austrheim, H.: Fluid and deformation induced metamorphic processes around Moho beneath  
576 continent collision zones: Examples from the exposed root zone of the Caledonian mountain belt, W-  
577 Norway, *Tectonophysics*, 609, 620-635, 2013.

578

579 Austrheim, H. and Andersen T.B.: Pseudotachylytes from Corsica: fossil earthquakes from a  
580 subduction complex. *Terra Nova*, 16, 193-197, 2004.

581

582 Austrheim, H., and Boundy, T.M.: Pseudotachylytes generated during seismic faulting and  
583 eclogitization of the deep crust: *Science*, 265: 82-83, 1994.

584

585 Bedford, J., Moreno, M., Baez, J.C., Lange, D., Tilmann, F., Rosenau, M., Heibach, O., Oncken, O.,  
586 Bartsch, M., Rietbrock, A., Tassara, A., Bevis, M., and Vigny, C.,: A high-resolution, time-variable  
587 afterslip model for the 2010 Maule Mw 8.8, Chile megathrust earthquake, *Earth Planet. Sci. Lett.*,  
588 383, 26–36, 2013.

589

590 Berger, A. and Bousquet, R.: Subduction-related metamorphism in the Alps: review of isotopic ages  
591 based on petrology and their geodynamic consequences. *Geological Society, London, Special  
592 Publications*, 298, 117-144, 2008.

593

594 Beroza, G.C. and Ide, S.: Slow Earthquakes and Non-volcanic Tremor, *Annual Review of Earth and  
595 Planetary Sciences*, 39, 271-296, 2011.

596

## REFERENCES

597 Bestmann, M, and Prior, D.J.: Intragranular dynamic recrystallization in naturally deformed calcite  
598 marble: diffusion accommodated grain boundary sliding as a result of subgrain rotation  
599 recrystallization, *Journal of Structural Geology*, 25, 1597-1613, 2003.  
600  
601 Bezert, P., Caby, R.: Sur l'âge post-bartonien des événements tectono-métamorphiques alpines en  
602 bordure orientale de la Corse cristalline. *Bulletin de la Société Géologique de France*, 8, 965-971,  
603 1988.  
604  
605 Bos, B., Spiers, C.J.: Frictional-viscous flow of phyllosilicate-bearing rocks: Microphysical model  
606 and implications for crustal strength profiles. *Journal of Geophysical Research*, 107, doi:  
607 10.1029/2001JB000301, 2002.  
608  
609 Burg, J.P, Laurent, P.: Strain analysis of a shear zone in a granodiorite. *Tectonophysics* 47:15-42.  
610 doi:10.1016/0040-1951 (78)90149-X, 1978.  
611  
612 Butler, R.H.W.: Area balancing as a test of models for the deep structure of mountain belts, with  
613 specific reference to the Alps. *Journal of Structural Geology* 52, 2-16, 2013.  
614  
615 Carminati, E., and Doglioni, C.: Alps vs. Apennines: The paradigm of a tectonically asymmetric  
616 Earth, *Earth-Science Reviews* 112 67-96: 2012.  
617  
618 Chester, F.M.: Dynamic recrystallization in semi-brittle faults. *Journal of Structural Geology* 11, 847-  
619 858, 1989.  
620  
621 Cooper, F. J., Platt, J. P., Platzman, E. S., Grove, M. J., and Seward, G.: Opposing shear senses in a  
622 subdetachment mylonite zone: Implications for core complex mechanics. *Tectonics*, 29,  
623 10.1029/2009TC002632, 2010.  
624  
625 Derez, T., Pennock, G., Drury, M., and Sintubin, M.: Low-temperature intracrystalline deformation  
626 microstructures in quartz. *Journal of Structural Geology*, 71, 3-23, 2015.  
627  
628 Deseta, N., Andersen, T.B., and Ashwal, L.D.: A weakening mechanism for intermediate depth  
629 seismicity? Detailed petrographic and microstructural observation from blueschist facies  
630 pseudotachylytes, Cape Corse, Corsica. *Tectonophysics* 610, 138-149, 2014a  
631  
632 Deseta, N., Ashwal, L.D., and Andersen, T.B.: Initiating intermediate-depth earthquakes: Insights  
633 from a HP-LT ophiolite from Corsica. *Lithos*, 206, 127-146, 2014b.  
634  
635 Di Rosa, M., De Giorgi, A., Marroni, M. and Vidal., O. Syn-convergent exhumation of continental  
636 crust: evidence from structural and metamorphic analysis of the Monte Cecu area, Alpine Corsica  
637 (Northern Corsica, France). *Geological Journal*, doi: 10.1002/gj.2857: 2016.  
638  
639 Di Vincenzo, G., Grande, A., Prosser, G., Cavazza, W., and De Celles, P.G.: 40Ar-39Ar laser dating  
640 of ductile shear zones from central Corsica (France): evidence of Alpine (middle to late Eocene) syn-  
641 burial shearing in Variscan granitoids, *Lithos*, doi: 10.1016/j.lithos.2016.07.022, 2016.  
642  
643 Evans, B.W.: Phase relations of epidote-blueschists. *Lithos* 25, 3-23, 1990.  
644  
645 Faccenna, C., Piromallo, C., Crespo-Blanc, A., Jolivet, L., and Rossetti, F.: Lateral slab deformation  
646 and the origin of the western Mediterranean arcs. *Tectonics* 23, TC1012, 2004.  
647  
648 Fagereng, Å, Hillary, G.W.B., and Diener, J.F.A.: Brittle-viscous deformation, slow slip, and tremor,

649 Geophysical Research Letters, 41, 4159–4167, doi:10.1002/2014GL060433, 2014.  
650  
651 Fitz Gerald, J.D., and Stunitz, H.: Deformation of granitoids at low metamorphic grades. I. Reactions  
652 and grain size reduction. *Tectonophysics* 221, 269–297, 1993.  
653  
654 Fu, Y., and Freymueller, J.T.: Repeated large slow slip events at the south central Alaska subduction  
655 zone, *Earth Planet. Sci. Lett.*, 375, 303–311, 2013.  
656  
657 Fousseis, F., and Handy, M.R.: Micromechanisms of shear zone propagation at the brittle–viscous  
658 transition. *Journal of Structural Geology* 30, 1242–1253, 2008.  
659  
660 Gapais, D., Bale, P., Choukroune, P., Cobbold, P.R., Mahjoub, Y., and Marquer, D.: Bulk kinematics  
661 from shear zone patterns: some field examples, *Journal of Structural Geology*, 9: 635–646.  
662 doi:10.1016/0191-8141(87)90148-9, 1987.  
663  
664 Garfagnoli, F., Menna, F., Pandeli, E., and Principi, G.: Alpine metamorphic and tectonic evolution  
665 of the Inzecca-Ghisoni area (southern Alpine Corsica, France). *Geological Journal*, 44, 191–210,  
666 2009.  
667  
668 Gibbons, W., and Horak, J.: Alpine metamorphism of Hercynian hornblende granodiorite beneath  
669 the blueschist facies schistes lustrés nappe of NE Corsica. *Journal of Metamorphic Geology* 2, 95–  
670 113, 1984.  
671  
672 Golcalves, P., Poilvet, J.-C., Oliot, E., Trap, P., Marquer, D.: How does shear zone nucleate? An  
673 example from the Suretta nappe (Swiss Eastern Alps). *Journal of Structural Geology* 86, 166–180,  
674 2016.  
675  
676 Guermani, A., and Pennacchioni, G.: Brittle precursors of plastic deformation in a granite: An example  
677 from the Mont Blanc Massif (Helvetic, western Alps), *Journal of Structural Geology*, 20, 135–148,  
678 1998.  
679  
680 Gueydan, F., Brun, J.P., Philippon, M., and Noury, M.: Sequential extension as record of Corsica  
681 rotation during Apennines slab roll-back. *Tectonophysics*, doi: 10.1016/j.tecto.2016.12.028, 2016.  
682  
683 Hacker, B.R., Peacock, S.M., Abers, G.A., Holloway S.D. Subduction factory 2. Are intermediate -  
684 depth earthquakes in subducting slabs linked to metamorphic dehydration reactions? *Journal of*  
685 *Geophysical Research*, 108, doi:10.1029/2001JB001129, 2003.  
686  
687 Handy, M.R., and Stunitz, H.: Strain localization by fracturing and reaction-weakening - a mechanism  
688 for initiating exhumation of subcontinental mantle beneath rifted margins. In: De Meer S., Drury  
689 M.R., De Bresser J.H.P., Pennock GM (eds) *Deformation mechanisms, rheology and tectonics:*  
690 *current status and future perspectives*, 200. Geological Society of London Special Publication, 387–  
691 407, 2002.  
692  
693 Handy M.R., and Brun, J.P.: Seismicity, structure and strength of the continental lithosphere. *Earth*  
694 *and Planetary Science Letters* 223, 427– 441, 2004.  
695  
696 Handy M.R., Hirth, G., and Burgmann, R.: Continental fault structure and rheology from frictional-  
697 to-viscous transition downward. In *Tectonic Faults: Agents of Change on a Dynamic Earth*. Handy,  
698 M.R., Hirth, G. and Hovius, N eds. Dahlem Workshop Reports, MIT press, 139–181, 2007.  
699  
700 Hayman, N.W., and Lavier, L.L.: The geologic record of deep episodic tremor and slip, *Geology*,

701 42, 195–198, doi:10.1130/G34990.1, 2014.  
702  
703 Healy, D., Reddy, S.M., Timms, N.E., Gray, E.M., and Vitale Brovarone, A.: Trench parallel fast  
704 axes of seismic anisotropy due to fluid-filled cracks in subducting slabs. *Earth and Planetary Science*  
705 *Letters* 283, 75-86, 2009.  
706  
707  
708 Hirth, G., and Tullis, J.: Dislocation creep regimes in quartz aggregates, *Journal of Structural*  
709 *Geology*, 14: 145–159, 1992  
710  
711 Hirth, G., Teyssier, C., and Dunlop, W.J.: An evaluation of quartzite flow laws based on comparisons  
712 between experimentally and naturally deformed rocks, *International Journal of Earth Sciences*, 90,  
713 77-87, 2001.  
714  
715 John, T., Medvedev, S., Rüpke, L.H., Andersen, T.B., Podladchikov, Y.Y., and Austrheim, Å.:  
716 Generation of intermediate-depth earthquakes by self-localizing thermal runaway, *Nature*  
717 *Geoscience*, 2, 137-140, doi:10.1038/NGEO419, 2009.  
718  
719 Jolivet, L., Dubois, R., Fournier, M., Goffé, B., Michard, A., Jourdan, C.: Ductile extension in Alpine  
720 Corsica. *Geology* 18, 1007-1010, 1990.  
721  
722 Kjøl, H.J., Viola, G., Menegon, L., and Sørensen, B.E.: Brittle-viscous deformation of vein quartz  
723 under fluid-rich lower greenschist facies conditions. *Solid Earth*, 6, 681-699, 2015.  
724  
725 Kohlstedt, D.L., Evans, B., and Mackwell, S.J.: Strength of the lithosphere: Constraints imposed by  
726 laboratory experiments, *Journal of Geophysical Research*, 100, 17857-17602, 1995.  
727  
728 Kruhl, J.H.: Prism- and basal-plane parallel subgrain boundaries in quartz: a microstructural  
729 geothermobarometer, *Journal of Metamorphic Geology*, 14, 581-589, 1996.  
730  
731 Küster, M., and Stöckhert, B.: High differential stress and sublithostatic pore fluid pressure in the  
732 ductile regime — microstructural evidence for short-term post-seismic creep in the Sesia Zone,  
733 Western Alps, *Tectonophysics*, 303, 263-277, 1999.  
734  
735 Lamb, S.: Shear stresses on megathrusts: Implications for mountain building behind subduction  
736 zones, *J. Geophys. Res.*, 111, B07401, doi:10.1029/2005JB003916, 2006.  
737  
738 Liu, Y., and Rice, J.R.: Spontaneous and triggered aseismic deformation transients in a subduction  
739 fault model, *J. Geophys. Res.*, 112, B09404, doi:10.1029/2007JB004930, 2007.  
740  
741 Maggi, M., Rossetti, F., Corfu, F., Theye, T., Andersen, T.B.: Faccenna, C., Clinopyroxene-rutile  
742 phyllonites from the East Tenda Shear Zone (Alpine Corsica, France): pressure-temperature-time  
743 constraints to the Alpine reworking of Variscan Corsica. *Journal of the Geological Society* 169, 723-  
744 732, 2012.  
745  
746 Magott, R., Fabbri, O., Fournier, M.: Subduction zone intermediate-depth seismicity: Insights from  
747 the structural analysis of Alpine high-pressure ophiolite-hosted pseudotachylytes (Corsica, France).  
748 *Journal of Structural Geology* 87, 95-114, 2016.  
749  
750 Magott, R., Fabbri, O., Fournier, M.: Polyphase ductile/brittle deformation along a major tectonic  
751 boundary in an ophiolitic nappe, Alpine Corsica: Insights on subduction zone intermediate-depth

752 asperities *Journal of Structural Geology* 87, 95-114, 2016.  
753  
754 Malatesta, C., Federico, L., Crispini, L., Capponi, G.: Fluid-controlled deformation in blueschist-  
755 facies conditions: plastic vs brittle behaviour in a brecciated mylonite (Voltri Massif, Western Alps,  
756 Italy) *Geological Magazine*, doi:10.1017/S0016756816001163, 2017.  
757  
758 Malasoma, A., Marroni, M., Musumeci, G., Pandolfi, L.: High pressure mineral assemblage in  
759 granitic rocks from continental units in Alpine Corsica, France. *Geological Journal*, 41, 49–59, 2006  
760  
761 Mancktelow, N.S.: How ductile are ductile shear zones? *Geology*, 34, 345-348, 2006  
762  
763 Mancktelow, N.S., and Pennacchioni, G.: The control of precursor brittle fracture and fluidrock  
764 interaction on the development of single and paired ductile shear zones. *Journal of Structural*  
765 *Geology*, 4, 27, 645–661, 2005.  
766  
767 Massonne, H.J., and Szpurka, Z.: Thermodynamic properties of white micas on the basis of high-  
768 pressure experiments in the systems  $K_2O-MgO-Al_2O_3-SiO_2-H_2O$  and  $K_2O-FeO-Al_2O_3-SiO_2-H_2O$ .  
769 *Lithos* 41, 229-250, 1997.  
770  
771 Mattauer, M., Faure, M. and Malavieille, J.: Transverse lineation and large scale structures related to  
772 Alpine obduction in Corsica. *Journal of Structural Geology*, 3, 401-409, 1981.  
773  
774 Mazzoli, S., Vitale, S., Del Monaco, G., Guerriero, G., Margottini, C., and Spizzichino, D.: ‘Diffuse  
775 faulting’ in the Machu Pichu granitoid pluton, Eastern Cordillera, Perú. *Journal of Structural*  
776 *Geology*, 31, 1395-1408, 2009.  
777  
778 Meneghini, F., Di Toro, G., Rowe, C. D., Moore, J. C., Tsutsumi, A., and Yamaguchi, A.: Record of  
779 mega-earthquakes in subduction thrusts: The black fault rocks of Pasagshak Point (Kodiak Island,  
780 Alaska), *Geol. Soc. Am. Bull.*, 122(7–8), 1280–1297, 2010.  
781  
782 Menegon, L., and Pennacchioni, G.: Local shear zone pattern and bulk deformation in the Gran  
783 Paradiso metagranite (NW Italian Alps), *International Journal of Earth Sciences*, 99, 1805-1825,  
784 2010.  
785  
786 Menegon, L., Piazzolo, S. and Pennacchioni, G.: The effect of Dauphiné twinning on plastic strain in  
787 quartz, *Contributions to Mineralogy and Petrology*, 161, 635-652, 2011.  
788  
789 Menegon, L., Stünitz, H., Nasipuri, P., Heilbronner, R., and Svahnberg, H.: Transition from  
790 fracturing to viscous flow in granulite facies perthitic feldspar (Lofoten, Norway), *Journal of Structural*  
791 *Geology*, 48, 95-112, 2013.  
792  
793 Molli, G., Malavieille, J.: Orogenic processes and the Alps/Apeninnes geodynamic evolution:  
794 insights from Taiwan. *Int J Earth Sci*, 100: 1207-1224, doi: 10.1007/s00531-010-0598-y, 2011.  
795  
796 Molli, G., Malasoma, A., Meneghini, F.: Brittle precursors of HP/LT microscale shear zone: a case  
797 study from Alpine Corsica. 15<sup>th</sup> Conference of Deformation, Rheology and Tectonics, Zurich,  
798 Abstract Volume, 153, 2005.  
799  
800 Molli, G.: Localizzazione di zone di taglio HP/LT su precursori fragili: Un esempio dalla Corsica  
801 Alpina, *Rend. Soc. Geol. It.*, 4 Nuova Serie, 270-271, 2007.  
802

803 Molli, G.: Northern Apennine-Corsica orogenic system: an updated review. In: Siegesmund, S.,  
804 Fugenschuh, B., Froitzheim, N. (Eds.), *Tectonic Aspects of the Alpine-Dinaride-Carpathian System*.  
805 Geological Society, London Special Publications, 298, 413- 442, 2008.  
806  
807 Molli, G., White, J.C., Kennedy, L., and Taini, V.: Low-temperature deformation of limestone, Isola  
808 Palmaria, Northern Apennine, Italy - The role of primary textures, precursory veins and  
809 intracrystalline deformation in localization. *Journal of Structural Geology*, 33, 255-270, doi: 10.1016  
810 /j.jsg.2010.11.015, 2011.  
811  
812 Neumann, B.: Texture development of recrystallised quartz polycrystals unravelled by orientation  
813 and misorientation characteristics. *Journal of Structural Geology*, 22, 1695-1711, 2000.  
814  
815 Ozawa, S., Murakami, M., Kaidzu, M., Tada, T., Sagiya, T., Hatanaka, Y., Yurai, H., and Nishimura,  
816 T.: Detection and monitoring of ongoing aseismic slip in the Tokai region, central Japan, *Science*,  
817 298(5595), 1009–1012, 2002.  
818  
819 Passchier, C.W., and Trouw, R.A.J.: *Microtectonics*. Springer. 366p., 2011.  
820  
821 Pec, M., Stünitz, and Heilbronner, R.: Semi-brittle deformation of granitoid gouges in shear  
822 experiments at elevated pressures and temperatures, *Journal of Structural Geology*, 38, 200-221,  
823 2012.  
824  
825 Peng, Z., and Gombert, J.: An integrated perspective of the continuum between earthquakes and slow  
826 slip phenomena, *Nature Geoscience*, 3, 599–607, 2010.  
827  
828 Pennacchioni, G.: Control of the geometry of precursor brittle structures on the type of ductile shear  
829 zone in the Adamello tonalites, Southern Alps (Italy), *Journal of Structural Geology*, 27, 627-644,  
830 2005  
831  
832 Pennacchioni, G., and Mancktelow, N.S.: Nucleation and initial growth of a shear zone network  
833 within compositionally and structurally heterogeneous granitoids under amphibolite facies  
834 conditions, *Journal of Structural Geology*, 29, 1757-1780, 2007.  
835  
836 Pennacchioni, G., and Zucchi, E.: High temperature fracturing and ductile deformation during  
837 cooling of a pluton: The Lake Edison granodiorite (Sierra Nevada batholith, California), *Journal of*  
838 *Structural Geology*, 50, 54-81, 2013.  
839  
840 Pennacchioni, G., Di Toro, G., Brack, P., Menegon, L., and Villa, I.M.: Brittle–ductile–brittle  
841 deformation during cooling of tonalite (Adamello, Southern Italian Alps), *Tectonophysics* 427, 171–  
842 197, 2006.  
843  
844 Pittarello, L., Pennacchioni, G., and Di Toro, G.: Amphibolite-facies pseudotachylytes in Premosello  
845 metagabbro and felsic mylonites (Ivrea Zone, Italy), *Tectonophysics*, 580, 43-57, 2012.  
846  
847 Platt, J.P., and Behr, W.M.: Lithospheric shear zones as constant stress experiments, *Geology*, 39,  
848 127-130, doi: 10.1130/G31561.1, 2011.  
849  
850 Polino, R., Dal Piaz, G.V., and Gosso, G.: Tectonic erosion at the Adria margin and accretionary  
851 process for the Cretaceous orogeny of the Alps. In: Roure, F., Heitzman, P., and Polino, R. (eds) *Deep*  
852 *Structure of the Alps*. Volume Speciale Società Geologica Italiana, Roma, 1, 345–367, 1990.  
853

854 Prior, D.J., Wheeler, J., Peruzzo, L., Spiess, R., and Storey, G.: Some garnet microstructures: an  
855 illustration of the potential of orientation maps and misorientation analysis in microstructural studies.  
856 *Journal of Structural Geology*, 24, 999-1011, 2002.  
857  
858  
859 Ramsay, J.G., and Graham, R.H.: Strain variation in shear belts. *Canadian Journal Earth Science* 7,  
860 786–813, 1970.  
861  
862 Rosenberg, C., and Kissling, E.: Three-dimensional insight into Central-Alpine collision: Lower-  
863 plate or upper-plate indentation? *Geology*, 41, 1219-1222, doi:10.1130/G34584.1, 2013.  
864  
865 Rossi, P., Durand-Delga, M., Lahondère, J. C., and Lahondère, D.: Carte géologique de la France à  
866 1/50.000, feuille Santo Pietro di Tenda, BRGM, 2003.  
867  
868 Rutter, E. H: On the nomenclature of mode of failure transitions in rocks, *Tectonophysics*, 122 (3-4),  
869 381- 387. 1986.  
870  
871 Schiffman, P., and Day, H.W.: Petrologic methods for the study of Very Low-grade metabasites in  
872 Low-Grade metamorphism (eds M. Frey and D. Robinson), Blackwell Publishing Ltd., Oxford, UK:  
873 doi: 10.1002/9781444313345.ch4, 2009.  
874  
875 Schmid, S.M., and Handy, M.R.: Towards a genetic classification of fault rocks: Geological usage  
876 and tectonophysical implications, in Muller, D.W., et al., eds., *Controversies in modern geology*:  
877 London, Academic Press, 339–361. 1991.  
878  
879 Schmid, S. M., Pfiffner, O.A., Froitzheim, N., Schonborn, G. and Kissling, E., Geophysical-geological  
880 transect and tectonic evolution of the Swiss-Italian Alps. *Tectonics*, 12, 1036-1064: 1996.  
881  
882 Scholz, C.H.: The brittle-plastic transition and the depth of seismic faulting. *Geologische Rundschau*,  
883 77, 319-328, 1988.  
884  
885 Scholz, C.H.: *The Mechanics of Earthquakes and Faulting*, 2nd ed., Cambridge University Press,  
886 2002.  
887  
888 Segall, P., and Simpson, C.: Nucleation of ductile shear zones on dilatant fractures, *Geology*, 14, 56–  
889 59, 1986.  
890  
891 Shimamoto, T.: The origin of S-C mylonites and a new fault-zone model, *Journal of Structural*  
892 *Geology* 11, 51-64, 1989.  
893  
894 Shimamoto, T., Logan, J.M. Velocity-dependent behaviours of simulated halite shear zones: an  
895 analog for silicates. *Am. Geophys. Mongr.*, 37, 49-63, 1986.  
896  
897 Sibson, R.H.: Fault rocks and fault mechanisms, *Journal of the Geological Society of London*, 133,  
898 191-213, 1977.  
899  
900 Sibson, R.H: Transient discontinuities in ductile shear zones, *Journal of Structural Geology*, 2, 165–  
901 171, 1980.  
902  
903 Sibson, R.H.: Continental fault structure and the shallow earthquake source, *Journal of the Geological*  
904 *Society of London*, 140, 741-767, 1983.



905  
906 Sibson, R.H.: A note on fault reactivation, *Journal of Structural Geology* 7, 751–754, 1985.  
907  
908 Simpson, C.: Deformation of granitic rocks across the brittle-ductile transition, *Journal of Structural*  
909 *Geology* 7: 503-511, 1985.  
910  
911  
912 Simpson, C.: Fabric development in brittle-to-ductile shear zones, *Pure and Applied Geophysics* 124  
913 (1-2), 269–288, 1986.  
914  
915 Stipp, M., Stunitz, H., Heilbronner, R. and Schmid, S.M.: The eastern Tonale fault zone: a ‘natural  
916 laboratory’ for crystal plastic deformation of quartz over a temperature range from 250 to 700 °C. *J*  
917 *Struct Geol*, 24, 1861-1884, 2002.  
918  
919 Stipp, M., and Tullis, J.: The recrystallized grain size piezometer for quartz, *Geophysical Research*  
920 *Letters*, 30, 21, 2088, doi:10.1029/2003GL018444, 2003.  
921  
922 Stöckhert, B.: Stress and deformation in subduction zones - insight from the record of exhumed  
923 metamorphic rocks, in *Geological Society of London Special Publication*, S. de Meer, et al., Editors.:  
924 London, 255-274, 2002.  
925  
926 Takagi, H., Goto, K., Shigematsu, N. Ultramylonite bands derived from cataclasite and  
927 pseudotachylyte in granites, northeast Japan., *J Struct Geol*, 22, 1325-1339, 2000.  
928  
929 Tödheide, K.: Water at high temperatures and pressures, in *Water: A Comprehensive Treatise*, vol.  
930 1, edited by F. Franks, chap. 13, pp. 463–514, Springer, New York, 1972.  
931  
932 Trepmann, C.A., Stockhert, B., Dorner, D., Moghadam, E.H., Kuster, M. and Roller, K.: Simulating  
933 coseismic deformation of quartz in the middle crust and fabric evolution during postseismic stress  
934 relaxation – an experimental study. *Tectonophysics* 442, 83–104, 2007.  
935  
936 Tribuzio, R., and Giacomini, F., Blueschist facies metamorphism of peralkaline rhyolites from the  
937 Tenda crystalline massif (northern Corsica): evidence for involvement in the Alpine subduction  
938 event? *Journal of Metamorphic Geology* 20, 513-526, 2002.  
939  
940 Van Daalen, M., Heilbronner, R., Kunze, K.: Orientation analysis of localized shear deformation in  
941 quartz fibres at the brittle–ductile transition, *Tectonophysics*, 303, 83-107, 1999.  
942  
943 Vannucchi, P., Remitti, F., and Bettelli, G.: Geological record of fluid flow and seismogenesis along  
944 an erosive subducting plate boundary, *Nature*. 451, 7179,699-703, 2008.  
945  
946 Vernooij, M. G., den Brok, B., and Kunze, K.: Development of crystallographic preferred orientations  
947 by nucleation and growth of new grains in experimentally deformed quartz single crystals,  
948 *Tectonophysics*, 427, 35–53, 2006a.  
949  
950 Vernooij, M.G.C., Kunze, K. and den Brok, B.: ‘Brittle’ shear zones in experimentally deformed  
951 quartz single crystals. *J Struct Geol* 28: 1292–1306, 2006b  
952  
953 Viola, G., Mancktelow, N. S., and Miller, J. A.: Cyclic frictional– viscous slip oscillations along the  
954 base of an advancing nappe complex: insights into brittle-ductile nappe emplacement mechanisms  
955 from the Naukluft Nappe Complex, central Namibia, *Tectonics*, 25, TC3016, doi:10.1029/2005 tc

956 001939, 2006.

957

958 Vitale Brovarone, A., Beyssac, OI., Malavieille, J., Molli, G., Beltrando, M., and Compagnoni, R.  
959 Stacking and metamorphism of continuous segments of subducted lithosphere in a high-pressure  
960 wedge: The example of Alpine Corsica (France). *Earth-Science Reviews*, 116, 35–56, 2013.

961

962 Wallace, L.M. and Beavan, J.: Diverse slow slip behavior at the Hikurangi subduction margin, New  
963 Zealand, *Journal of Geophysical Research*, 115, B12402, doi:10.1029/2010JB007717, 2010.

964

965 White, J.C. and White, S.H.: Semi-brittle deformation within the Alpine fault zone, New Zealand. *J*  
966 *Struct Geol* 5: 579-589, 1982

967

968 White, J.C.: Transient discontinuities revisited: Pseudotachylyte, plastic instability and the influence  
969 of low pore fluid pressure on deformation processes in the mid-crust. *J Struct Geol* 18: 1471-1477,  
970 1996.

971

972 Zibra, I., Kruhl, J.H., and Braga, R.: Late Palaeozoic deformation of post-Variscan lower crust: shear  
973 zone widening due to strain localization during retrograde shearing, *International Journal of Earth*  
974 *Sciences*, 99, 973-991, 2010.

975

976

977

978

979

980

## FIGURES LIST AND CAPTION

Fig.1 a) Alpine Corsica within the Alps/Apennine framework, b) Tectonic map of north Corsica showing the main tectonic units and the area of studied sample. 1,2) Corsican continental crust, mainly Carboniferous-Permian granitoids, their host pre-Carboniferous basement and a Mesozoic to Eocene cover: (1a) "autochthonous" Hercynian Corsica and (1b) greenschist/lower-blueschist external continental units (Corte; Popolasca); 2) inner continental units: (2a) upper-blueschist units (Tenda Massif; Centuri) and (2b) eclogite slices (Serra di Pigno-Farinole); 3) Schistes Lustrés nappe (undifferentiated); 4) Nappe Supérieure, i.e. upper non-metamorphic units (Balagne, Nebbio and Macinaggio units); 6) Miocene sediments; c) Regional sketch cross-section with indication of location of the studied sample from the Popolasca area.

Fig.2. ~~Mesoscopic view of the~~ Analyzed sample: host protomylonitic metagranite host with millimetre-scale ultramylonite localized after brittle precursor. All observable deformation structures were developed under HP/LT metamorphic conditions. ~~Dashed line??~~  
What is the difference between a) and b)? Necessary? If used, it should be commented upon.

Fig.3. ~~Microscopic views~~ Microphotographs of the host-rock showing quartz microstructures typical of low temperature plasticity: a) intracrystalline deformation (undulatory extinction, deformation lamellae, deformation bands, localized extinction bands, (LEBs) associated with recrystallization along intragranular conjugate shear bands sets; b) brittle fracturing in domino-style brittle fracturing of K-feldspar and associated with K-feldspar breakdown to albite, stilpnomelane and phengite; c) quartz deformation lamellae and intergranular recrystallization by bulging; d) K-feldspar intergranular recrystallization and albite-neocrystallization, recrystallization also observable along later cracks and microfractures (horizontal to sub-horizontal).

Fig.4 a) BSE image of the metamorphic mineral assemblage in the host granitoids of the studied sample; Ab, albite; Amp, Na-amphibole; Kfs, K-feldspar; Phe, phengite; Qtz, quartz; b) composition of sodic amphiboles, using the classification of Leake et al. (1997); c) estimated peak-metamorphic pressure/temperature conditions for the studied sample (cross-hatched area) constrained by the reactions indicated.

**Commentato [GV40]:** Figures have to be improved to better document key microstructural relationships.

**Commentato [GV41]:** Kind of useless inset, really. Improve or remove.

**Commentato [GV42]:** Please find a way to add this text straight to the figure. Much nicer and easier to read.

**Commentato [GV43]:** Corte what? Popolasca what? Units? Areas? Same below

**Commentato [GV44]:** Well, this is not what can see here! Please describe what the photo shows

**Commentato [GV45]:** Indicate the trace of what you call conjugate bands. Far from obvious.

**Commentato [GV46]:** You have to indicate and label all these features and phases!

**Commentato [GV47]:** Where?

**Commentato [GV48]:** You mean from left to right in the section?

1015 Fig.5 a) Microscopic view of millimetre-scale shear zone nucleated after brittle precursor, with  
1016 indication of the structural-compositional domains within the shear zone. Domain 1 relict domain of  
1017 cataclasite; Domain 2 phyllonite; Domain 3 ultramylonite; b) detail of the sharp shear-zone boundary  
1018 heritage of former host-fracture contact and ultramylonite to phyllonite transition within the  
1019 microscale shear zone are well observable; c) detail of domain 1, relict domain of cataclasite, mainly  
1020 K-feldspar dominated. Angular fragments of variable size are indicative of brittle comminution.

Commentato [GV49]: ??

Commentato [GV50]: One cannot see this, sorry.

Commentato [GV51]: Where would domain 3 be exactly?

1021 Fig. 6 -Microscopic view of ultramylonite; a) synkinematic Na-amphibole, boudinaged within the  
1022 quartz and albite ultramylonite matrix; b) Quartz and albite recrystallized matrix, in the lower part  
1023 the boundary of microscale shear zone together with an host quartz porphyroclast; c) Quartz-ribbon with a  
1024 strong elongation (1:15, X/Z ratio) defining a shape preferred orientation oblique (15°) to the shear  
1025 zone boundary; d) detail of quartz recrystallization in the ribbon porphyroclast and matrix.

Commentato [GV52]: All this has to be documented and better illustrated/documented. I have some problems in linking your words to what the image shows.

Commentato [GV53]: Document also the quartz clasts. Any textural relationship confirming the later viscous deformation of these cataclasite?? That would be crucial for the story.

Commentato [GV54]: Indicate the trace of the mylonitic foliation.

Commentato [GV55]: Show layout of clast or trace boundary

Commentato [GV56]: See my comment in the main text

Commentato [GV57]: Is there an angular discordance between the EW strike of the ribbon and the S in the upper part of the thin section?

Commentato [GV58]: Split this figure into two. Too dense. Enlarge the individual components.

1027 Fig. 7. EBSD analysis of quartz in the host protomylonite. (a) Microstructure of the analysed site.  
1028 The white arrows indicate localized extinction bands that have been analysed with the boundary trace  
1029 analysis and misorientation profiles as shown in Figs. 7b-g. (b) Inverse Pole Figure Map with the  
1030 respect to the protomylonitic foliation in the host rock (vertical in the figure). Location of subset 1  
1031 and 2 and trace of misorientation profiles 1-3 are shown. (c) Pole figure of the host grain, colour  
1032 coded per the quartz inverse pole figure shown in (b). (d) Pole figure of recrystallized quartz in the  
1033 intracrystalline bands. The blue and red line indicates the average orientation of the trace of the  
1034 intracrystalline bands with a subset 1 and 2 orientation, respectively. (e) Boundary trace analysis of  
1035 the localized extinction band of subset 1. (f) Boundary trace analysis of the localized extinction band  
1036 of subset 2. (g) Point-to-point misorientation profiles. See (b) for location of the traces of the profiles.  
1037 (h) Misorientation axis of the host grain and of the recrystallized grains in sample coordinates.

Commentato [GV59]: Indicate on the figure, please.

Commentato [GV60]: Make the numbers larger.

1040 Fig. 8. EBSD analysis of quartz in the ultramylonite. (a) Microstructure of the recrystallized quartz  
1041 from domain 3 in the ultramylonite. (b) Pole figure of recrystallized quartz grains from (a). Only  
1042 grains from recrystallized ribbons in the ultramylonite were analysed.

Commentato [GV61]: Link it to a properly defined D<sub>main 3</sub> in Fig. 5.

1043 Fig.9. a) Brittle failure analysis for our studied sample, see text for assumptions and approximations.  
1044 For the differential stress range and the vertical stress considered, brittle failure requires  
1045 (sub)lithostathic fluid pressure ( $0.96 < \lambda < 1$ ) whereas viscous deformation at the estimated depth  
1046 range (23-30 km) is only possible for pore fluid pressure  $\leq 0.94$ ; b) Rheological profile calculated for  
1047 a fixed strain rate of  $10^{-12} \text{ s}^{-2}$  (see text for calculation details) using the quartz flow law of Hirth et al.

1049 (2001). Cycle of switching in deformation style and mechanisms is suggested for the analyzed sample  
1050 in its ambient depth-range. Frictional Byerlee envelope is calculated using an average friction  
1051 coefficient of 0.7 for various pore fluid pressure ratio values (Fig.9a and text). Stress estimates based  
1052 on recrystallized -quartz piezometry (grey shaded area) ~~have been were~~ calculated following Stipp  
1053 and Tullis, (2003).

1054

1055

1056 Fig.10. -a) Simplified ~~view model~~ of the ancient subduction of the corsican continental crust, with  
1057 indication where the mechanical coupling is the highest (seismogenic zone) and lowest (stable slip).  
1058 The white rectangle corresponds to the inferred zone of the studied sample. The pink to red shading  
1059 ~~figured-plots~~ the lower to higher blueschist- to eclogite-facies peak metamorphism in continental-  
1060 derived crustal units; b,c,d Multi-stage scenario for development of the association of granitic  
1061 protomylonites and ultramylonites from brittle precursors in the Popolasca area: a) General sketch  
1062 showing the east-dipping ancient alpine subduction of the corsican continental crust. b): Formation  
1063 of a crustal scale anastomosed network of shear zones within the host granitic crust ~~and~~; active  
1064 distributed deformation with aseismic creep; c: Formation of brittle instabilities (stage 2) in the shear  
1065 zone by seismic ruptures nucleated along (1) the subduction interface ~~(+)~~ or (2) the core of granites  
1066 ~~(?)~~ and ~~having propagated~~propagating across and beyond the granitic mylonites, followed by post-  
1067 seismic creep, with localization of viscous shear zone after brittle precursor (stage 3); d) Formation  
1068 of brittle instabilities by seismic tremors and slow-slip events followed by post-seismic (post-tremors)  
1069 creep.

1070
