# Supplementary material for: Switching deformation mode and mechanisms during subduction of continental crust:a case study from Alpine Corsica
Source: Copernicus journal article supplement (doi:10.5194/se-2017-11), 2017-02-07
Supplement: Supplementary file [file se-2017-11-RC2-supplement.pdf]

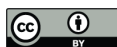

1       **SWITCHING DEFORMATION MODE AND MECHANISMS DURING SUBDUCTION OF**  
2       **CONTINENTAL CRUST:**  
3       **A CASE STUDY FROM ALPINE CORSICA**

4  
5  
6  
7                   Giancarlo Molli <sup>a</sup>, Luca Menegon <sup>b</sup>, Alessandro Malasoma <sup>c</sup>

8  
9  
10       a Dipartimento di Scienze della Terra, Università di Pisa, Via S. Maria, 53, Pisa 56126, Italy

11       b School of Geography, Earth and Environmental Sciences, Plymouth University, Plymouth, UK

12       c TLS Lab and Geoservices, Via Vecchia Fiorentina, 10, 56023 Cascina, Pisa Italy

13  
14       *Correspondence to:* Giancarlo Molli (giancarlo.molli@unipi.it)

15  
16  
17       **Abstract.** The switching in deformation mode (from distributed to localized) and mechanisms (viscous  
18       versus frictional) represent a relevant issue in the frame of crustal deformation, being also connected  
19       with the concept of the brittle-“ductile” transition and seismogenesis. In subduction environment,  
20       switching in deformation mode and mechanisms may be inferred along the subduction interface, in a  
21       transition zone between the highly coupled (seismogenic zone) and decoupled deeper aseismic domain  
22       (stable slip). On the other hand, the role of brittle precursors in nucleating crystal-plastic shear zones  
23       has received more and more consideration being now recognized as fundamental in the localization of  
24       deformation and shear zone development, thus representing a case in which switching deformation  
25       mode and mechanisms interact and relate to each other. This contribution analyzes an example of a  
26       crystal plastic shear zone localized by brittle precursor formed within a host granitic-protomylonite  
27       during deformation in subduction-related environment. The studied structures, possibly formed by  
28       transient instability associated with fluctuations of pore fluid pressure and episodic strain rate variations  
29       may be considered as a small scale example of fault behaviour associated with a cycle of interseismic  
30       creep and coseismic rupture or a new analogue for episodic tremors and slow slip structures. Our case-  
31       study represents, therefore, a fossil example of association of fault structures related with stick-slip  
32       strain accomodation during subduction of continental crust.

33  
34  
35  
36  
37  
38  
39  
40



## 41 1. Introduction

42 The study of deformation fabric of fault rocks has been the base to develop a general model for crustal  
43 scale fault zones (Sibson, 1977; Sibson, 1983; Scholz, 1988; Scholtz, 2002; Handy et al., 2007; Cooper  
44 et al. 2010; Platt and Behr, 2011). In this model, the increasing PT conditions determine the transition  
45 from a seismogenic frictional regime, dominated by pressure-sensitive deformation and involving  
46 cataclasis and frictional sliding, to a viscous regime (Rutter, 1986; Schimid and Handy, 1991; Handy  
47 and Brun, 2004), where dominantly aseismic, mainly crystal-plastic and continuous shearing is  
48 localized within mylonitic shear zones. In quartzo-feldspathic rocks, this transition is primarily  
49 determined by temperature-related quartz response to change in deviatoric stress, with dislocation creep  
50 becoming the principal deformation mechanism at  $T > 270$  °C (Sibson et al., 2002 and references).

51 Rock deformation experiments (Rutter, 1986; Shimamoto and Logan 1986; Bos and Spiers 2002;  
52 Scholz 2002) have shown that the shear strength of simulated faults at the brittle-viscous transition may  
53 depend on normal stress (as by faulting dominated by cataclastic mechanisms) although strain is  
54 achieved through crystal plasticity and/or solution transfer. These results support the hypothesis that  
55 some mylonitic shear zones are produced by coupled frictional and viscous mechanisms under semi-  
56 brittle conditions (Shimamoto and Logan, 1986; Shimamoto, 1989; Chester, 1989; Scholz, 2002; Pec et  
57 al., 2012 and references). Studies on semi-brittle behaviour leave several open questions regarding  
58 natural fault zones including micromechanisms controlling bulk-rock deformation, the degree of  
59 interdependence of active deformation mechanisms, their cyclicity and the associated bulk rock style of  
60 deformation (Sibson, 1980; White and White, 1983; Takagi et al., 2000; Handy and Brun, 2004; Pec et  
61 al., 2012). Complex transitional behaviour involving mixed continuous and discontinuous, distributed  
62 vs. localized, and cyclic switching in deformation mechanisms over large variations in strain rates is  
63 inferred at the transition between frictional and viscous domains, a zone which includes the typical  
64 hypocentres and rupture depths for large earthquakes in continental crust (Sibson, 1983; Kohlstedt et  
65 al., 1995; Scholz, 2002; Handy and Brun, 2004).

66 In convergent subduction settings, similarly, the transition zone, located between 10 and 35 km depth  
67 depending on slab dip and thermal structure (i.e., between temperatures of 150 °C and 350–450 °C),  
68 along subduction interfaces is recognized as the site of megathrust earthquake nucleation and  
69 concentrated postseismic afterslip, as well as the focus site of episodic tremor and slow slip events  
70 (Seki et al., 2003; Vannucchi et al., 2008; Meneghini et al., 2010; Angiboust et al., 2012; Andersen et  
71 al., 2014; Hayman and Lavier, 2014; Fagereng et al., 2014; Angiboust et al., 2015).

72 The feedback between brittle and viscous deformation modes is relevant also for the mechanisms of  
73 shear zone nucleation, so that fracturing has been proposed to be even a pre-requisite for the initiation  
74 of ductile shear zones in the lithosphere (Handy and Stünitz, 2002; Pennacchioni and Mancktelow,



75 2007; Fousseis and Handy, 2008, among others). Shear zones and style of strain accommodation in terms  
76 of **distributed vs. localized deformation** in granitoids have been described by different authors (Ramsay  
77 and Graham, 1970; Burg and Laurent 1978; Simpson, 1983; Gapais et al. 1987; Goncalves et al. 2016  
78 and references therein). In this context, the role of brittle precursors in nucleating **crystal-plastic** shear  
79 zones has received ~~more and more~~ consideration ~~being now recognized as having~~ a fundamental role  
80 ~~the localization process~~ (Segall and Simpson, 1986; Mancktelow and Pennacchioni, 2005;  
81 Pennacchioni, 2005; Pennacchioni and Mancktelow, 2007; Menegon and Pennacchioni, 2010;  
82 Pennacchioni and Zucchi 2012, among others).

83 However these works mostly deal with brittle precursors consisting of inherited structures such as  
84 ~~discontinuities already existing at the beginning of deformation~~, as ~~the cases of~~ cooling joints,  
85 cataclasites and veins (e.g. Guermani and Pennacchioni, 1998; Pennacchioni and Mancktelow 2007)  
86 and most of them consider deformation at shallow to intermediate crustal depths (Fousseis and Handy,  
87 2008; Mazzoli et al., 2009; Molli et al., 2011) although case studies framed under conditions of upper  
88 amphibolite to granulite facies (White, 1996; Pennacchioni and Cesare, 1997; Kisters et al., 2000;  
89 Pittarello et al., 2013; Altenberger et al., 2013) and eclogite facies (Austrheim and Boundy, 1994;  
90 Austrheim, 2013 and references therein) were also investigated.

91 The case of deformation of crustal units and granitoids during subduction **has been only recently**  
92 analysed in terms of rock records of paleo-seismic cycle and/or slow-slip phenomena (Angiboust et al.,  
93 2015). A well-documented study from the Dent Blanche Thrust in the Western Alps is framed in the  
94 hangingwall of an ancient subduction interface zone (Angiboust et al., 2014; 2015). ~~On the contrary~~,  
95 our contribution analyses a microscale example of brittle precursor of a **crystal plastic** shear zone  
96 derived from the footwall of a subduction interface ~~in ambient~~ blueschist-facies conditions thus  
97 representing ~~a still not yet or less documented~~ case study (Molli et al., 2005; Molli 2007).

98 By virtue of their deep origin, the analysed structures are ideally suited to contribute to the ongoing  
99 discussion on the deformation style and mechanisms associated with the broad spectrum of fault-slip  
100 behaviour (from seismic slip to stable aseismic creep, to episodic slow slip events and non-volcanic  
101 tremors) recorded by seismic and geodetic observations at active plate boundaries (e.g. Peng and  
102 Gombert 2010; Beroza and Ide, 2011, and references therein). Slow slip events (i.e. fault slip events  
103 with slip rates in between coseismic slip and aseismic creep, and generating equivalent seismic  
104 moments similar to large earthquakes) in subduction zones have been recorded in a depth interval that  
105 experiences temperatures between 250 and 650° C and pressures between 0.6 and 1.2 GPa (Beroza and  
106 Ide, 2011), typically in areas of high Vp/Vs ratios suggestive of local high fluid pressures. This locates  
107 slow slip events at the lower end of the seismogenic zone, at metamorphic conditions where the  
108 rheology is expected to be viscous or at the frictional-viscous transition. Accordingly, recent studies of

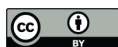

109 shear zones exhumed from similar conditions along the subduction interface have suggested that  
 110 coupled fracture and viscous flow, possibly associated with fluctuations in fluid pressure, can originate  
 111 tremors and slow slips (e.g. Jereng et al., 2014; Hayman and Lavier, 2014; Angiboust et al., 2015;  
 112 Malatesta et al., 2013). Here we show that the HP brittle-viscous transition preserved in the Popolasca  
 113 granitoids can also be explained with transient high fluid pressures triggering brittle deformation in an  
 114 otherwise viscous regime, and discuss the related implications for fault-slip behaviours in subduction  
 115 zones.

116

## 117 2. Regional background and Geological Setting of studied sample

118 In Alpine-type orogens the study of meso- and microstructural record of exhumed subduction related  
 119 thrust zones and its interpretation in terms of subduction zone rheology and seismicity have received  
 120 increasing attention since the end of '90 (Stöckhert et al., 1999; Kuster and Stöckhert, 1999). This  
 121 subject has been developed in particular in the Alpine Corsica (Austrheim and Andersen, 2004;  
 122 Andersen and Austrheim, 2006; Healy et al., 2009; Andersen et al., 2014; Deseta et al., 2014a,b; Magott  
 123 et al., 2016a,b) in oceanic units made up of peridotite, serpentinite, gabbro, basalt, calcareous and  
 124 siliceous schist and marble exposed as remnants of the lithosphere of the Jurassic Piemonte- Liguria  
 125 oceanic basin and its pelagic sedimentary cover (Mattauer et al., 1981; Bezert and Caby, 1988; Jolivet  
 126 et al., 1990; Molli, 2008; Vitale Brovarone et al., 2013).

127 These widespread occurrences and preservations of relicts of seismogenic exhumed structures are  
 128 mainly related to the peculiar geologic history of Alpine Corsica, connected with the development of  
 129 the Alps/Apennine orogenic system (Molli and Malavieille, 2011; Guyedan et al., 2017; Beaudoin et al.,  
 130 in press) with the lacks of the continent-continent "hard collision"- related structures and thermal  
 131 reworking observable in the Alps (e.g. Polino et al., 1995; Schmid et al., 1997; Berger and Busquet,  
 132 2008; Butler, 2013; Rosenberg and Kissling, 2013; Carminati and Doglioni, 2014) and a better  
 133 preservation of the early stages of subduction-related structures and fabrics.

134 Corsica, therefore, represents a suitable natural laboratory for the investigation of the subduction-related  
 135 processes in oceanic and continental crust as firstly suggested by Mattauer et al. (1981) and Gibson and  
 136 Horak (1984).

137 In Corsica, continental-derived units, i.e. units derived from the footwall of ancient subduction interface  
 138 zone, can be observed in three different structural positions (Fig.1), each of them corresponding to a  
 139 different peak metamorphism (Tribuzio and Giacomini, 2004; Molli, 2008; Vitale Brovarone et al.,  
 140 2013):

141 the innermost slices (Serra di Pigno/Farinole units) interleaved with oceanic units show eclogite peak  
 142 conditions at 1,5/1,5 GPa; 500 ± 50 °C;



143 - the intermediate ones (e.g. the Tenda and Centuri units) are instead characterized by Upper Blueschist  
144 facies peak conditions at 0,9/1,1 GPa; 450± 50 °C;

145 - the most external (e.g. Corte/Popolasca units) show high pressure greenschist and/or blueschist facies  
146 peak assemblages developed at T =325/370°C, P = 0.75/0.85 GPa (Malasoma et al., 2006; Di Rosa et  
147 al., 2016).

148 These occurrences document the progressive underthrusting at different depths and their in-sequence  
149 contractional exhumation within an young e-age east-dipping subduction system (Mattauer et al., 1981;  
150 Bezert and Caby, 1988; Jolivet et al., 1990; Garfagnoli et al., 2009; Molli and Malavieille, 2011; Maggi  
151 et al., 2012; Di Rosa et al., 2016; Guyedan et al., 2017).

152 The studied samples come from the external continental units (Molli, 2008; Molli and Malavieille,  
153 2011; Vitale Brovarone et al., 2013) of Alpine Corsica and in more detail from the Popolasca Unit  
154 (Bezert and Caby, 1988; Malasoma et al., 2006; Di Rosa et al., 2016). This unit is characterized by a  
155 pre-Mesozoic basement mainly formed by granitoids, a Permo-Mesozoic metasedimentary sequence  
156 and an Early-Eocene flysch (Fig. 1).

157 Blueschist assemblages in the unit have been described by regional studies (Bezert and Caby, 1988;  
158 Malasoma et al., 2006; Molli, 2008; Di Rosa et al., 2016) and can be observed in all suitable rock-types:  
159 in metapelites from cover rocks, in metabasic dykes and some of the granitoid suites from the basement.

160 Peak metamorphism has been constrained at 250/350°C, 0.4/0.55 GPa (Bezert and Caby, 1988) or more  
161 recently better defined at 325/370 °C and 0.75/0.85 GPa (Malasoma et al., 2006; Di Rosa et al., 2016).

162 The prograde to peak pressure assemblage has been recently dated in the range of 45-36 Ma by Di  
163 Vincenzo et al., (2016).

164 The contributions of Malasoma et al., (2006), Di Rosa et al., (2016) analysed the cartographic to  
165 mesoscopic-scale structural geometries of deformation in the area of the studied sample.

166 Superimposed foliations and fold structures are typical of the metasedimentary cover, with blueschist  
167 assemblages as relict fabrics. On the contrary, in basement rocks a main phase continuous foliation can

168 be observed wrapping around undeformed granitoids. The main foliation is either associated with  
169 blueschist or greenschist facies assemblages (Malasoma et al., 2005; Di Rosa et al., 2016; Di Vincenzo  
170 et al., 2016). Anastomosed network of fault zones associated with subgreenschist facies assemblages

171 overprints all previous structures and may be related to the activity of a major N/S trending transcurrent  
172 fault zone (Central Corsica Fault Zone) reworked by normal kinematics active during Oligocene-

173 Miocene in the frame of rototranslation of Corsica-Sardinia microblock and upper-plate extension  
174 associated with Apenninic subduction (Faccenna et al., 2004; Molli, 2008; Molli and Malavieille, 2011;

175 Carminati and Doglioni, 2014; Guyedan et al., 2017).

176



177

### 178 3. Geometry of deformation and microstructures

179 The analysed sample (Fig.2) is a deformed ~~granitoid of calcalkaline suite~~ (K-feldspar, plagioclase,  
180 quartz, biotite) ~~well known in the~~ Hercynian Corsica (Rossi et al., 2001). It shows a continuous  
181 foliation (Fig.2,3a,b) mainly defined by the shape preferred orientation of quartz, feldspars and biotite  
182 grains.

183 Shape anisotropy of quartz in the host protomylonite shows an aspect ratio around 0,37 (mean X/Z of  
184 2,7) which indicates a shear strain  $\gamma$  of c.1 assuming deformation in simple shear.

185 Quartz shows ~~typical~~ features of low temperature plasticity (Tullis et al., 2000; Stipp et al., 2002;  
186 Vernooij et al., 2006; Trepmann et al., 2007; Derez et al., 2015; Kjøl et al., 2015) (Fig 3), such as  
187 **undulatory extinction**, localized extinction bands (LEBs, following the terminology of Derez et al.,  
188 2015), typically forming conjugate sets, and up to 100  $\mu\text{m}$  thick intracrystalline bands of recrystallized  
189 grains (5-10  $\mu\text{m}$  in size). Bands of recrystallized grains occur parallel to the main foliation as well as in  
190 conjugate sets intersecting at ca. 90° and parallel to the conjugate sets of LEBs.

191 Feldspars show local evidence of grain size reduction by microcracking and microfaulting (Fig.3)  
192 associated with K-feldspar breakdown to albite (by bulging recrystallization) (Fig.3), stilpnomelane and  
193 phengite. Thin needles of Na-amphibole (Fig.4) attest the development of this fabric in HP/LT  
194 conditions as described below.

195

196 The main foliation is cross-cut at high angle by a millimetre-thick localized zone of deformation  
197 (Fig.2,5). This shows a sharp boundary, truncating flattened quartz and feldspar grains; a feature  
198 suggesting its development as unstable fracture (Schmid and Handy, 1991; Passchier and Trouw, 2011).

199 Three compositionally controlled domains can be recognized within the thin localized shear zone  
200 (Fig.2,5):

201 Domain 1 is feldspar-dominated and shows microstructural features typical of a cataclasite (Fig.5a,c).  
202 Feldspar clasts (and quartz grains) reveal both displacive intragranular fractures and intergranular  
203 “stable” cracks (Atkinson, 1982; Schmid and Handy, 1991).

204 Domain 2 is “phyllosilicate”-dominated (stilpnomelane and phengite) and shows microstructural  
205 features of a foliated-cataclasite/phylionite (Fig.5a,b). Asymmetric porphyroclasts and shear band  
206 systems characterize the phyllosilicate-rich parts of the shear zone.

207 Domain 3 is a quartz-albite rich domain showing microstructural features typical of an ultramylonite.  
208 This is characterized by very fine recrystallized albite and quartz grains (5-10  $\mu\text{m}$  in size) (Fig.5a,b;  
209 Fig.6) with strong crystallographic preferred orientation (see below). Quartz porphyroclast shows a  
210 mean aspect ratio around 0,09 (mean X/Z of 11) which corresponds to a calculated shear strain  $\gamma$  of c. 3



211 At this shear strain the corresponding angle between the foliation and the shear zone boundary in simple  
212 shear is around  $15^\circ$  which agrees with the mean orientation of the quartz porphyroclasts shape  
213 preferred orientation defining the ultramylonitic foliation (Fig.6a,b,c) Syn to post-kinematic Na-  
214 amphibole (Fig.6a) documents shearing in HP/LT metamorphic conditions, as illustrated here below.

215

#### 216 **4. Mineral chemistry and estimate of metamorphic Pressure-Temperature (P-T) conditions**

217 Chemical analyses of coexisting minerals within the metamorphic assemblage (Tab.1) were obtained  
218 using a JEOL JXA-8600 electron microprobe, equipped with four wavelength-dispersive spectrometers,  
219 at the CNR - Istituto di Geoscienze e Georisorse, Firenze, Italy. Running conditions were 15 kV  
220 accelerating voltage and 10 nA beam current on a Faraday cage. Counting time for the determined  
221 elements ranged from 10 to 60 s at both peak and background. The Bence and Albee (1968) method  
222 was employed for the correction of all data. A number of synthetic and mineral standards were used for  
223 instrumental calibration.

224 **Amphibole.** Structural formulae were calculated assuming 23 oxygens, and the classification of Leake  
225 et al. (1997) was adopted. Site assignment and ferric iron contents were calculated using the scheme  
226 proposed by Schumacher in Leake et al. (1997). Because of the small sizes of the crystals (widths  
227  $c.10\mu\text{m}$ ), it was not possible to make compositional traverses across individual crystals to detect  
228 intracrystalline variations in chemical composition, such as core-to-rim zonation. Thus, each analysis  
229 reported in Table 1 represents a different crystal. In the studied sample the Na-amphiboles are mostly  
230 riebeckite (Tab.1 and Fig. 4b) with low Mg/(Mg+Fe<sup>2+</sup>) ratio (0.13-0.21) and are characterized by Si  
231 contents close to the maximum of 8.0 apfu.

232 **Other minerals.** ~~All analysed albites, of which structural formulae~~ were calculated assuming 8  
233 oxygens, have composition close to the pure end-member. Stilpnomelane structural formulae were  
234 calculated assuming 24 oxygens and all Fe as divalent (Fe<sup>2+</sup>). Stilpnomelanes have Fe amounts ranging  
235 from 1.86 to 2.91 apfu and Mg amounts ranging from 0.24 to 0.58 apfu. For K-feldspar and biotite  
236 porphyroclasts, structural formulae were calculated assuming respectively 8 and 22 oxygens. The  
237 analysed K-feldspars have composition close to the orthoclase pure end-member, with minor amounts  
238 of Na.

239

240 The peak metamorphic mineral assemblage is characterised by Na-amphibole + phengite + quartz +  
241 albite + stilpnomelane. Na-amphibole is a typical mineral related to the blueschist facies and is  
242 indicative of HP/LT gradient metamorphism (e.g. Evans 1990; Schiffman & Day 1999 and references).  
243 The minimum temperature (T) and pressure (P) conditions of this mineral assemblage can be estimated  
244 using the reaction curves proposed by Schiffman & Day (1999) for the appearance of Na-amphibole



245 (stability field of the blueschist facies); meanwhile the maximum temperature (T) conditions were  
246 constrained by the presence of stilpnomelane, as shown by the equilibrium:  $\text{Stp} + \text{Phe} = \text{Bt} + \text{Chl} + \text{Qtz} + \text{W}$   
247 (Massonne & Szpurka, 1997). Summing up all the available thermobarometric information, the  
248 metamorphic conditions can be estimated as temperature (T) around  $320 \pm 50$  °C and pressure (P) ~~> of~~  
249 0.70 GPa (Fig.4c); consistent with those described by Malasoma *et al.* (2006) in metagranitic rocks  
250 from the area of our studied sample.

251

252

253

## 254 5. EBSD data

255 EBSD analysis of quartz was conducted with a Jeol 7001 FEG-SEM equipped with a NordlysMax  
256 EBSD detector (Oxford Instruments) at the Plymouth University Electron Microscopy Centre. Working  
257 conditions during acquisition of the EBSD patterns were 20 kV, 70° sample tilt and high vacuum. Thin  
258 sections were chemically polished with colloidal silica and carbon-coated before the analysis. EBSD  
259 patterns were acquired on rectangular grids with step size of 1  $\mu\text{m}$  and 2  $\mu\text{m}$ . EBSD patterns were  
260 acquired and indexed with the AZtec software and processed with Channel 5 software (Oxford  
261 Instruments). Raw EBSD data were processed to reduce data noise following the procedure tested by  
262 Prior *et al.* (2002) and Bestmann and Prior (2003). EBSD results are shown ~~in form of~~ Inverse Pole  
263 Figure map, pole figures (~~equal angle, lower hemisphere~~) of crystallographic axes and planes ( $\langle 0001 \rangle$   
264 c-axis,  $\langle 11-20 \rangle$  a-axis,  $\{10-10\}$  prism  $\{m\}$ ,  $\{10-11\}$  positive rhomb  $\{r\}$ ,  $\{01-11\}$  negative rhomb  $\{z\}$ ),  
265 misorientation profiles and plots of misorientation axis in sample coordinates.

266

### 267 5.1 Quartz in the host rock

268 We analysed a monocrystalline quartz ribbon elongated parallel to the host-rock foliation and sharply  
269 cut by the thin localized shear zone. The quartz ribbon contains two nearly orthogonal sets of  
270 intracrystalline shear bands of recrystallized grains (Fig. 7a); one set is oriented at high angle ( $90^\circ \pm 20$ ,  
271 *set 1*) and one at low angle ( $\leq 20^\circ$ , *set 2*) to the host rock foliation (vertical in Fig. 7a). The average  
272 grain size of the recrystallized grains is  $5 \pm 2$   $\mu\text{m}$ . The ribbon ~~contains also fine localized~~ extinction  
273 bands (~~up to 20  $\mu\text{m}$  thick~~) (LEBs: Derez *et al.*, 2015) subparallel to the bands of recrystallized grains.  
274 Low-angle boundaries are ubiquitous in the ribbon; on EBSD maps they are typically straight, poorly  
275 connected, and subparallel to the bands of recrystallized grains (Fig. 7b). Some low-angle boundaries  
276 are connected to form subgrains of approximately the same size ~~of~~ the recrystallized grains. Subgrains  
277 occur with a higher frequency at the intersection between two sets of recrystallized bands, and in  
278 regions sandwiched between closely spaced ( $\leq 100$   $\mu\text{m}$ ) subparallel bands of recrystallized grains (Fig.





279 7b).

280 The c-axis of the ribbon is oriented near the pole to the host-rock foliation, ~~i.e.~~ in a position suitably  
 281 oriented for the activation of the basal  $\langle a \rangle$  slip system of quartz (Fig. 7c). The c-axis orientation of the  
 282 recrystallized grains in the intracrystalline bands is mostly spread out along the periphery of the pole  
 283 figure, although some scattered grains have their c-axis in intermediate positions between the X and Y  
 284 directions of the pole figures (Fig. 7d). Such an orientation suggests that the recrystallized grains have  
 285 experienced a rotation around ~~the Y-direction of finite strain (i.e. centre~~ of the pole figure) from the  
 286 host-grain orientation (e.g. Van Daalen et al., 1999; Menegon et al., 2011).

287 This is confirmed by the boundary trace analysis (Prior et al., 2002; Menegon et al., 2010) of the two  
 288 main sets of straight low-angle boundaries defining localized extinction bands (parallel to bands of  
 289 recrystallized grains), one running ENE-WSW (*subset 1*) and one running ca. N-S (*subset 2*) in Fig. 7b.  
 290 The dispersion paths of crystallographic directions on the pole figures of subset 1 (Fig. 7e) identifies  
 291  $\{m\}$  as the rotation axis, which lies very close to the centre of the pole figure. The pole to the prismatic  
 292 plane  $\{m\}$  is the rotation axis associated with the basal  $\langle a \rangle$  and with the  $\{a\} \langle c \rangle$  slip system in quartz  
 293 (e.g. Neumann, 2000), and, accordingly, subset 1 can be interpreted as a tilt boundary plane produced  
 294 by the activity of the slip system basal  $\langle a \rangle$  (Fig. 7e) and containing the boundary trace of subset 1 and  
 295 the rotation axis.

296 Subset 2 has a similar dispersion path as subset 1, with  $\{m\}$  as the identified rotation axis. However, in  
 297 this case the boundary trace analysis is not consistent with a tilt boundary produced by the activity of  
 298 the slip system basal  $\langle a \rangle$ , but could indicate the activity of the  $\{a\} \langle c \rangle$  slip system (Fig. 7f). However,  
 299 activity of c-slip in quartz typically requires temperature in excess of 600° C (Kruhl, 1996; Zibra et al.,  
 300 2010) and, therefore, appears unlikely in our samples. Moreover, misorientation profiles across  
 301 angle boundaries with a subset 2 orientation show abrupt misorientation jumps of up to 6° (profiles 2  
 302 and 3 in Figs. 7b and 7g), as opposed to a gradual accumulation of misorientation towards low-angle  
 303 boundaries with a subset 1 orientation (profile 1 in Figs. 7b and 7g). Thus, the low-angle boundaries  
 304 with a subset 2 orientation could represent microcracks subparallel to the basal planes (e.g. Kjøl et al.,  
 305 2015) that localized rigid body rotation of fragments around the Y-direction (e.g. Trepmann et al., 2007;  
 306 Menegon et al., 2013). The rotation around Y of (1) the crystallographic directions of the host grain and  
 307 (2) the recrystallized grains (in this case for large misorientation  $> 10^\circ$ ) is confirmed by the plots of the  
 308 misorientation axis in sample coordinates (Fig. 2).

309

### 310 5.2 Quartz in the localized shear zone

311 We analysed polycrystalline ribbons of recrystallized grains from domain 3 of the localized shear zone  
 312 (Fig. 8a). The c-axis orientation of the recrystallized grains defines an inclined type-I crossed girdle



313 synthetically oriented with respect to the bulk shear sense of the shear zone (Fig. 8b). The c-axes are  
 314 preferentially clustered near the pole to the shear zone boundary, i.e. in an orientation slightly oriented  
 315 for the activity of the basal <a> slip system. ~~The average grain size of the recrystallized grains in~~  
 316 ~~domain 3 is 6±2 μm.~~

317

### 318 6. Ultramylonite: Paleopiezometry, flow stress and strain rate

319 The microstructure and the crystallographic preferred orientation of quartz indicate that quartz in the  
 320 protomylonite and ultramylonite deformed by **dislocation creep** (concomitant with microcracking in the  
 321 protomylonite) and recrystallized to a fine-grained aggregate. Thus, the rheology and the flow stress in  
 322 the ultramylonite can be evaluated extrapolating experimentally calibrated flow laws of quartz to the  
 323 deformation conditions.

324 The rheology of quartz deforming by dislocation creep is generally described in terms of a power-  
 325 law equation:

$$326 \quad \dot{\epsilon} = A f_{H_2O}^m e^{(-Q/RT)} \sigma^n \quad (1)$$

327 Where  $\dot{\epsilon}$  is the strain rate,  $f_{H_2O}$  is the water fugacity (raised to the power of m), Q is the activation  
 328 energy, R is the universal gas constant, T is the temperature,  $\sigma$  is the differential stress, and n is the  
 329 stress exponent. We used the ~~theoretical~~ dislocation creep flow law of Hirth et al. (2001), which ~~has~~  
 330 ~~derived~~ a linear dependence of strain rate on the water fugacity (m=1) and a stress exponent of 4. A  
 331 water fugacity of 172 MPa ~~is calculated from the water fugacity coefficient reported in Töðheide (1972)~~  
 332 at T=350°C, P=0.8 GPa.

333 The paleostress (assuming steady-state flow at time of viscous deformation) can be determined by  
 334 recrystallized quartz grain size paleopiezometer (e.g. Stipp & Tullis, 2003), which have been calibrated  
 335 in the form:  $\Delta\sigma = B D^{-X}$ , where  $\Delta\sigma$  is the steady state differential stress ( $\sigma_1 - \sigma_3$ ), D is the recrystallized  
 336 grain size and B and X are empirical constants. Using the recrystallized grain size piezometer of quartz  
 337 calibrated by Stipp and Tullis (2003), a recrystallized grain size of 5-10 μm indicates differential stress  
 338 in the range of 110-190 MPa. Extrapolation of the flow law of Hirth et al. (2001) yields a strain rate in  
 339 the range of  $7.6 * 10^{-13} - 6.2 * 10^{-12} \text{ sec}^{-1}$  in the ultramylonite at the estimated deformation temperature  
 340 of 350°C.

341

## 342 7. Discussion and conclusion

343

### 344 7.1 Viscous-brittle-viscous deformation under HP/LT conditions



345 The analysed example documents a switch in deformation mode and mechanisms within an HP/LT fault  
346 zone. ~~On the base of~~ overprinting relationships and microstructural features the following deformation  
347 sequence ~~may be suggested~~: stage (1), associated with a distributed deformation and development of a  
348 protomylonitic foliation in the granitoid by quartz low temperature plasticity, microfracturing, and  
349 albite neo-crystallization from K-feldspar porphyroclasts (Fitzgerald and Stunitz, 1993) has been  
350 followed by stage (2), in which localized deformation by brittle fracturing formed a millimeter-thick  
351 cataclaste, which acted as a precursor for (3) localization of viscous deformation and ultramylonite  
352 development. The synkinematic and postkinematic growth of Na-amphibole in the host rock foliation  
353 and in localized ultramylonite indicates that the entire deformation sequence occurred at HP/LT  
354 conditions (ca. 350°C at  $\geq 0.7$  GPa), corresponding to a depth of 23-30 km in the subduction channel.

355 The estimated P, T conditions are consistent with low-T plasticity regime in quartz (Stipp et al., 2002;  
356 Derez et al., 2015 and refs therein). Accordingly, the deformation microstructures of quartz produced  
357 during stage (1) in the host rock appear to be the product of the competition between dislocation activity  
358 and fracturing. Localized extinction bands at high angle to the host rock foliation (subset 1 in Fig. 7b)  
359 are consistent with the activity of the basal  $\langle a \rangle$  slip system, whereas localized extinction bands  
360 subparallel to the host-rock foliation (subset 2 in Fig. 7b) are interpreted as fractures subparallel to the  
361 basal plane, as previously observed by Kjöll et al. (2015). Some localized extinction bands (especially  
362 those with a subset 2 orientation, see Fig. 7b) contain isolated small new grains that are considerably  
363 smaller than the average grain size in the recrystallized bands, and that are only slightly misoriented  
364 with respect to the host grain. Moreover, the high-angle boundaries in such localized extinction bands  
365 are not always fully connected to define entire new grains. Together with the abrupt misorientation  
366 jumps (Fig. 7g), these observations further suggest that localized extinction bands with a subset 2  
367 orientation represent fractured domains in which the fragments have rotated passively and sealed  
368 together as proposed by e.g. Derez et al. (2015).

369 Despite the local fracturing of the host grain, deformation of the recrystallized grains in the conjugate  
370 intracrystalline bands involved dislocation activity, as indicated by the cluster of misorientation axis  
371 around the prism  $\{m\}$  for low misorientations (compare Fig. 7h with 7d). This is consistent with the  
372 local activity of the basal  $\langle a \rangle$  slip system in the recrystallized bands, as also indicated by the CPO of  
373 the recrystallized grains in the bands at high angle to the host rock foliation (Fig. 7d).

374 The type-I crossed girdle c-axis CPO of quartz in the ultramylonite suggests the concomitant activity of  
375 basal  $\langle a \rangle$ , rhomb  $\langle a \rangle$  and prims  $\langle a \rangle$  slip systems in the recrystallized ribbons (Fig. 8). The grain size  
376 of recrystallized quartz in the ultramylonites is in the same range (5-10  $\mu\text{m}$ ) as in the intracrystalline  
377 bands in the host rock. This suggests that 5-10  $\mu\text{m}$  represents the equilibrium grain size with the flow  
378 stress (estimated in the range of 110-190 MPa with recrystallized grain size piezometry) during viscous

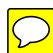

### 379 deformation before and after the transient brittle event of stage (2).

380 During stage (2) the development of cataclasite and related dilatancy resulted in an increase of  
 381 permeability and thus facilitated fluid access and fluid mobility in the shear zone. This enhanced  
 382 mineral transformations as testified by modal enrichment of stilpnomelane (by biotite breakdown) and  
 383 Na-amphibole in the ultramylonite.

384 Therefore, the observed structures witness a change in deformation style (from distributed to localized  
 385 strain in brittle precursor), and a switch in the dominant deformation mechanism (from low T plasticity  
 386 in the host rock to cataclasis and back to crystal plasticity in the ultramylonite), which occurred at the  
 387 footwall of subduction interface at temperature conditions typical of the brittle/viscous transition in  
 388 quartz/feldspathic rocks.

389 Finally, the transition from stage (2) and stage (3) is consistent with the general observation that  
 390 nucleation of localized ductile shear zones requires the presence of a planar compositional or structural  
 391 precursor (e.g. Pennacchioni and Zucchi, 2012, and references therein). The example from the  
 392 Popolasca granite demonstrates that (i) nucleation on brittle precursors also occurs under HP/LT  
 393 conditions in the subduction channel, and (ii) the brittle precursors are not necessarily inherited from an  
 394 earlier deformation event, but can be the manifestation of switches in deformation mode in the footwall  
 395 of the subduction interface.

396

### 397 **7.2 Significance of the switch in deformation mode and implications for fault-slip behaviours in** 398 **subduction zones**

399 We interpreted the inferred deformation sequence and structures as the result of transient instabilities  
 400 (Sibson, 1980; White, 1996; Handy and Brun, 2004) possibly representative of mixed fault-slip  
 401 behaviours at seismogenic depth in the subduction channel. We have estimated the conditions resulting  
 402 in the transient brittle event during stage (2) under the following assumptions and approximations:

- 403 1. The coefficient of internal friction,  $\mu_i$ , is generally between 0.5 and 1.0 in intact rocks (Sibson,  
 404 1985). We considered  $\mu_i = 0.6$  in the failure envelope for the intact Popolasca granitoid.
- 405 2. We used a cohesive strength of 35 MPa as representative for granitoids (Amitrano and  
 406 Schmittbuhl, 2002), with a resulting tensile strength of 17.5 MPa.
- 407 3. We assumed an Andersonian stress field and a thrust regime. The effective vertical stress  $\sigma'_v$   
 408 corresponds to the effective minimum principal stress  $\sigma'_3 = \sigma_3 - P_f$ , where  $P_f$  is the pore fluid  
 409 pressure. We considered a hydrostatic pore pressure ( $\lambda = 0.4$ ,  $P_f = 320$  MPa for  $\sigma_3 = 800$  MPa)  
 410 during the formation of the gneissic foliation in the host rock.
- 411 4. We assumed a differential stress of 110-190 MPa during viscous flow of the granitoid prior to

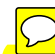



412 brittle failure at  $\sigma_v = 480$  MPa, as derived from the recrystallized grain size piezometry in the  
413 protomylonite.

414 The results of our analysis are shown in Fig. 9a. For brittle failure, it is necessary to invoke high  
415 differential stresses (of the order of 1.1 GPa assuming a hydrostatic pore fluid pressure), or higher fluid  
416 pressure (Fig. 9a). Differential stresses in excess of 1 GPa have been associated with intermediate depth  
417 (50-300 km) earthquakes in the subduction channel (e.g. John et al., 2009), and are expected to result in  
418 extensive development of pseudotachylytes in granitoid rocks (e.g. Austrheim 2013 and references  
419 therein), which, on the contrary, have not been observed in the sample studied here.

420 For the differential stress range and the vertical stress considered here, brittle failure requires  
421 (sub)lithostathic fluid pressure ( $0.96 < \lambda < 1$ , Fig. 9). The strength envelope plotted for pore fluid  
422 pressure between 0.98 and 0.94 and for a strain rate of  $10^{-12}$  s<sup>-1</sup> (Fig. 9b) suggests that viscous  
423 deformation at the estimated depth range (23-30 km) is only possible for pore fluid pressure  $\leq 0.94$ ,  
424 otherwise brittle deformation is expected to occur. Thus, under the assumptions listed above, ~~our~~  
425 ~~analysis indicates that~~ local fluctuations in pore fluid pressure can explain the cyclic viscous-brittle-  
426 viscous deformation switch. However, despite the synkinematic growth of hydrous minerals in the  
427 cataclastite and the high pore fluid pressure required at failure, there is no evidence of macroscopic  
428 veining or hybrid fractures in the samples. Our analysis is consistent with this observation, in that  
429 failure occurs entirely in the shear fractures field and not in the (hybrid) shear extension fractures field  
430 (Fig. 9a).

431 Drawing from the results shown in Figs. 9a,b and using concept and inferences coming from modern  
432 studies of convergent subduction system (e.g. Ozowa et al., 2002; Fu and Freymuller, 2013; Bedford et  
433 al., 2013) ~~we may suggest~~ the following deformation path (Fig.10) ~~for the structural features of our~~  
434 ~~analysed sample~~. A first stage of distributed deformation (stage 1) may be associated with large scale  
435 anastomosed shear zone development and aseismic creep, then, following Angiboust et al. (2015), two  
436 possible deformation scenario and slip patterns may be envisaged: (a) propagation at seismic rate of  
437 microrupture followed by afterslip or (b) slow slip phenomena in an aseismically creeping crust. In the  
438 first case transient strain rate increase associated with brittle fracturing would represent the deep  
439 response of the transition zone to a specific stage of the seismic cycle taking place higher up along the  
440 seismogenic portion of the subduction interface (Fig.10c, scenario 1) or in less deformed domains  
441 acting as local stress raisers nearby (Fig.10c, scenario 2). Cataclastic deformation would then correlate  
442 with coseismic to postseismic deformation higher up along the interface. In that case, the mylonitization  
443 of the brittle precursor would be the record of subsequent interseismic deformation at lower strain rates,  
444 taking place in the time frame between two earthquakes.

445 In the second case (Fig.10d), the transient highs in strain rates related to brittle fracturing and cataclasis



446 could be the ~~field evidence of deformation associated with~~ slow slip events (SSEs) or other transient  
447 slips, generally localized along the subduction interface at this depth range itself (e.g., Shelly et al.,  
448 2006; Fagereng et al., 2014). We are aware that the mechanism(s) of SSEs initiation are still poorly  
449 understood, and that stress/strain rate perturbations triggered by an earthquake nearby followed by  
450 postseismic slip and interseismic creep is an equally feasible mechanism to explain the deformation  
451 sequence recorded in our sample. However, our preferred interpretation is that the transient brittle  
452 deformation recorded in our studied sample is the manifestation of a slow slip event, for the following  
453 reasons: (1) subduction interface SSEs typically occur at the downdip transition from stick-slip  
454 behaviour to aseismic creep (e.g. Wallace and Beavan, 2010), and, in granitoid rocks, this transition is  
455 expected to occur at the T range of deformation of our case-study, as witnessed by the deformation  
456 microstructures of quartz and feldspar in the host protomylonite; (2) SSEs are often related to high pore  
457 fluid pressure (e.g. Liu and Rice, 2007).

458 Whatever the actual process triggering brittle deformation was, we want to emphasize that detailed  
459 microstructural studies of exhumed shear zones are a valuable complement to the geodetic,  
460 seismological and experimental studies that aim to unravel the complex fault-slip behaviours at the  
461 subduction interface. In this context, our studied sample represents a new and still not yet documented  
462 case study of brittle-viscous transition zone and processes in subducted continental crust. Moreover, our  
463 study reinforces the concept that the external zones of Alpine Corsica represent a unique target to  
464 document and understand footwall deformation structures and processes related with HP/LT continental  
465 subduction.



466

467 **8. References**

468

469

470 Altenberger, U., Prosser, G., Grande, A., Günter, C., and Langone, A.: A seismogenic zone in the deep  
471 crust indicated by pseudotachylytes and ultramylonites in granulite-facies rocks of Calabria (Southern  
472 Italy), *Contributions to Mineralogy and Petrology*, 166, 975-994, 2013.

473

474 Amtrano, D., and Schmittbuhl, J.: Fracture roughness and gouge distribution of a granite shear band,  
475 *Journal of Geophysical Research*, 107, B12, doi:10.1029/2002JB001761, 2002.

476

477 Andersen, T.B., and Austrheim, H.: Fossil earthquakes recorded by pseudotachylytes in mantle  
478 peridotites from the Alpine subduction complex of Corsica. *Earth and Planetary Science Letters* 242,  
479 58-72, 2006

480

481 Andersen, T.B., Austrheim, H., Deseta, N., Silkoset, P., and Ashwal, L.D.: Large subduction  
482 earthquakes along the fossil Moho in Alpine Corsica. *Geology*, 42, 395-398, 10.1130/G35345.1, 2014.

483

484 Angiboust, S., Glodny, J., Oncken, O., Chopin, C. In search of transient subduction interfaces in the  
485 Dent Blanche–Sesia Tectonic System (W. Alps), *Lithos*, 205, 298-321, 2014.

486

487 Angiboust, S., Kirsch, J., Oncken, O., Glodny, J., Monié, P., and Rybacki, E.: Probing the transition  
488 between seismically coupled and decoupled segments along an ancient subduction interface.  
489 *Geochemistry Geophysics Geosystems*, 16, 1905-1922, doi:10.1002/2015GC005776, 2015.

490

491 Atkinson, B.K.: Subcritical crack propagation in rocks: theory, experimental result and applications.  
492 *Journal of Structural Geology*, 4: 41–56, 1982.

493

494 Austrheim, H.: Fluid and deformation induced metamorphic processes around Moho beneath continent  
495 collision zones: Examples from the exposed root zone of the Caledonian mountain belt, W-Norway,  
496 *Tectonophysics*, 609, 620-635, 2013.

497

498 Austrheim, H. and Andersen T.B.: Pseudotachylytes from Corsica: fossil earthquakes from a subduction  
499 complex. *Terra Nova*, 16, 193-197, 2004.

500

501 Austrheim, H., and Boundy, T.M.: Pseudotachylytes generated during seismic faulting and  
502 eclogitization of the deep crust: *Science*, 265: 82-83, 1994.

503

504 Bedford, J., Moreno, M., Baez, J.C., Lange, D., Tilmann, F., Rosenau, M., Heibach, O., Oncken, O.,  
505 Bartsch, M., Rietbrock, A., Tassara, A., Bevis, M., and Vigny, C.: A high-resolution, time-variable  
506 afterslip model for the 2010 Maule Mw 8.8, Chile megathrust earthquake, *Earth Planet. Sci. Lett.*, 383,  
507 26–36, 2013.

508

509 Berger, A. and Bousquet, R.: Subduction-related metamorphism in the Alps: review of isotopic ages  
510 based on petrology and their geodynamic consequences. Geological Society, London, Special  
511 Publications, 298, 117-144, 2008.

512

513 Beroza, G.C. and Ide, S.: Slow Earthquakes and Non-volcanic Tremor, *Annual Review of Earth and  
514 Planetary Sciences*, 39, 271-296, 2011.

515



- 516 Bestmann, M, and Prior, D.J.: Intragranular dynamic recrystallization in naturally deformed calcite  
517 marble: diffusion accommodated grain boundary sliding as a result of subgrain rotation  
518 recrystallization, *Journal of Structural Geology*, 25, 1597-1613, 2003.  
519
- 520 Bezert, P., Caby, R.: Sur l'âge post-bartonien des événements tectono-métamorphiques alpines en  
521 bordure orientale de la Corse cristalline. *Bulletin de la Société Géologique de France*, 8, 965–971,  
522 1988.  
523
- 524 Bos, B., Spiers, C.J.: Frictional-viscous flow of phyllosilicate-bearing rocks: Microphysical model and  
525 implications for crustal strength profiles. *Journal of Geophysical Research*, 107, doi:  
526 10.1029/2001JB000301, 2002.  
527
- 528 Burg, J.P, Laurent, P.: Strain analysis of a shear zone in a granodiorite. *Tectonophysics* 47:15-42.  
529 doi:10.1016/0040-1951 (78)90149-X, 1978.  
530
- 531 Butler, R.H.W.: Area balancing as a test of models for the deep structure of mountain belts, with  
532 specific reference to the Alps. *Journal of Structural Geology* 52, 2-16, 2013.  
533
- 534 Carminati, E., and Doglioni, C.: Alps vs. Apennines: The paradigm of a tectonically asymmetric Earth,  
535 *Earth-Science Reviews* 112 67–96: 2012.  
536
- 537 Chester, F.M.: Dynamic recrystallization in semi-brittle faults. *Journal of Structural Geology* 11, 847-  
538 858, 1989.  
539
- 540 Cooper, F. J., Platt, J. P., Platzman, E. S., Grove, M. J., and Seward, G.: Opposing shear senses in a  
541 subdetachment mylonite zone: Implications for core complex mechanics. *Tectonics*, 29,  
542 10.1029/2009TC002632, 2010.  
543
- 544 Derez, T., Pennock, G., Drury, M., and Sintubin, M.: Low-temperature intracrystalline deformation  
545 microstructures in quartz. *Journal of Structural Geology*, 71, 3-23, 2015.  
546
- 547 Deseta, N., Andersen, T.B., and Ashwal, L.D.: A weakening mechanism for intermediate depth  
548 seismicity? Detailed petrographic and microstructural observation from blueschist facies  
549 pseudotachylytes, Cape Corse, Corsica. *Tectonophysics* 610, 138-149, 2014a  
550
- 551 Deseta, N., Ashwal, L.D., and Andersen, T.B.: Initiating intermediate-depth earthquakes: Insights from  
552 a HP-LT ophiolite from Corsica. *Lithos*, 206, 127-146, 2014b.  
553
- 554 Di Rosa, M., De Giorgi, A., Marroni, M. and Vidal., O. Syn-convergent exhumation of continental  
555 crust: evidence from structural and metamorphic analysis of the Monte Cecu area, Alpine Corsica  
556 (Northern Corsica, France). *Geological Journal*, doi: 10.1002/gj.2857: 2016.  
557
- 558 Di Vincenzo, G., Grande, A., Prosser, G., Cavazza, W., and De Celles, P.G.: 40Ar–39Ar laser dating of  
559 ductile shear zones from central Corsica (France): evidence of Alpine (middle to late Eocene) syn-burial  
560 shearing in Variscan granitoids, *Lithos*, doi: 10.1016/j.lithos.2016.07.022, 2016.  
561
- 562 Evans, B.W.: Phase relations of epidote-blueschists. *Lithos* 25, 3–23, 1990.  
563
- 564 Faccenna, C., Piromallo, C., Crespo-Blanc, A., Jolivet, L., and Rossetti, F.: Lateral slab deformation  
565 and the origin of the western Mediterranean arcs. *Tectonics* 23, TC1012, 2004.  
566



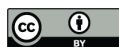

- 567 Fagereng, Å, Hillary, G.W.B., and Diener, J.F.A.: Brittle-viscous deformation, slow slip, and tremor,  
568 Geophysical Research Letters, 41, 4159–4167, doi:10.1002/2014GL060433, 2014.
- 569
- 570 Fitz Gerald, J.D., and Stunitz, H.: Deformation of granitoids at low metamorphic grades. I. Reactions  
571 and grain size reduction. *Tectonophysics* 221, 269–297, 1993.
- 572
- 573 Fu, Y., and Freymueller, J.T.: Repeated large slow slip events at the south central Alaska subduction  
574 zone, *Earth Planet. Sci. Lett.*, 375, 303–311, 2013.
- 575
- 576 Fusseis, F., and Handy, M.R.: Micromechanisms of shear zone propagation at the brittle–viscous  
577 transition. *Journal of Structural Geology* 30, 1242–1253, 2008.
- 578
- 579 Gapais, D., Bale, P., Choukroune, P., Cobbold, P.R., Mahjoub, Y., and Marquer, D.: Bulk kinematics  
580 from shear zone patterns: some field examples, *Journal of Structural Geology*, 9: 635–646.  
581 doi:10.1016/0191-8141(87)90148-9, 1987.
- 582
- 583 Garfagnoli, F., Menna, F., Pandeli, E., and Principi, G.: Alpine metamorphic and tectonic evolution of  
584 the Inzecca-Ghisoni area (southern Alpine Corsica, France). *Geological Journal*, 44, 191–210, 2009.
- 585
- 586 Gibbons, W., and Horak, J.: Alpine metamorphism of Hercynian hornblende granodiorite beneath the  
587 blueschist facies schistes lustrés nappe of NE Corsica. *Journal of Metamorphic Geology* 2, 95–113,  
588 1984.
- 589
- 590 Golcalves, P., Poilvet, J.-C., Oliot, E., Trap, P., Marquer, D.: How does shear zone nucleate? An  
591 example from the Suretta nappe (Swiss Eastern Alps). *Journal of Structural Geology* 86, 166–180, 2016.
- 592
- 593 Guermani, A., and Pennacchioni, G.: Brittle precursors of plastic deformation in a granite: An example  
594 from the Mont Blanc Massif (Helvetic, western Alps), *Journal of Structural Geology*, 20, 135–148,  
595 1998.
- 596
- 597 Gueydan, F., Brun, J.P., Philippon, M., and Noury, M.: Sequential extension as record of Corsica  
598 rotation during Apennines slab roll-back. *Tectonophysics*, doi: 10.1016/j.tecto.2016.12.028, 2016.
- 599
- 600 Hacker, B.R., Peacock, S.M., Abers, G.A., Holloway S.D. Subduction factory 2. Are intermediate -  
601 depth earthquakes in subducting slabs linked to metamorphic dehydration reactions? *Journal of*  
602 *Geophysical Research*, 108, doi:10.1029/2001JB001129, 2003.
- 603
- 604 Handy, M.R., and Stunitz, H.: Strain localization by fracturing and reaction-weakening - a mechanism  
605 for initiating exhumation of subcontinental mantle beneath rifted margins. In: De Meer S., Drury M.R.,  
606 De Bresser J.H.P., Pennock GM (eds) *Deformation mechanisms, rheology and tectonics: current status*  
607 *and future perspectives*, 200. Geological Society of London Special Publication, 387–407, 2002.
- 608
- 609 Handy M.R., and Brun, J.P.: Seismicity, structure and strength of the continental lithosphere. *Earth and*  
610 *Planetary Science Letters* 223, 427– 441, 2004.
- 611
- 612 Handy M.R., Hirth, G., and Burgmann, R.: Continental fault structure and rheology from frictional-to-  
613 viscous transition downward. In *Tectonic Faults: Agents of Change on a Dynamic Earth*. Handy, M.R.,  
614 Hirth, G. and Hovius, N eds. Dahlem Workshop Reports, MIT press, 139–181, 2007.
- 615
- 616 Hayman, N.W., and Lavier, L.L.: The geologic record of deep episodic tremor and slip, *Geology*, 42,  
617 195–198, doi:10.1130/G34990.1, 2014.

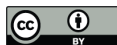

- 618  
619 Healy, D., Reddy, S.M., Timms, N.E., Gray, E.M., and Vitale Brovarone, A.: Trench parallel fast axes  
620 of seismic anisotropy due to fluid-filled cracks in subducting slabs. *Earth and Planetary Science Letters*  
621 283, 75-86, 2009.  
622  
623  
624 Hirth, G., and Tullis, J.: Dislocation creep regimes in quartz aggregates, *Journal of Structural Geology*,  
625 14: 145–159, 1992  
626  
627 Hirth, G., Teyssier, C., and Dunlop, W.J.: An evaluation of quartzite flow laws based on comparisons  
628 between experimentally and naturally deformed rocks, *International Journal of Earth Sciences*, 90, 77-  
629 87, 2001.  
630  
631 John, T., Medvedev, S., Rüpke, L.H., Andersen, T.B., Podladchikov, Y.Y., and Austrheim, Å.:  
632 Generation of intermediate-depth earthquakes by self-localizing thermal runaway, *Nature Geoscience*,  
633 2, 137-140, doi:10.1038/NGEO419, 2009.  
634  
635 Jolivet, L., Dubois, R., Fournier, M., Goffé, B., Michard, A., Jourdan, C.: Ductile extension in Alpine  
636 Corsica. *Geology* 18, 1007-1010, 1990.  
637  
638 Kjøl, H.J., Viola, G., Menegon, L., and Sørensen, B.E.: Brittle-viscous deformation of vein quartz  
639 under fluid-rich lower greenschist facies conditions. *Solid Earth*, 6, 681-699, 2015.  
640  
641 Kohlstedt, D.L., Evans, B., and Mackwell, S.J.: Strength of the lithosphere: Constraints imposed by  
642 laboratory experiments, *Journal of Geophysical Research*, 100, 17857-17602, 1995.  
643  
644 Kruhl, J.H.: Prism- and basal-plane parallel subgrain boundaries in quartz: a microstructural  
645 geothermobarometer, *Journal of Metamorphic Geology*, 14, 581-589, 1996.  
646  
647 Küster, M., and Stöckhert, B.: High differential stress and sublithostatic pore fluid pressure in the ductile  
648 regime — microstructural evidence for short-term post-seismic creep in the Sesia Zone, Western Alps,  
649 *Tectonophysics*, 303, 263-277, 1999.  
650  
651 Lamb, S.: Shear stresses on megathrusts: Implications for mountain building behind subduction zones,  
652 *J. Geophys. Res.*, 111, B07401, doi:10.1029/2005JB003916, 2006.  
653  
654 Liu, Y., and Rice, J.R.: Spontaneous and triggered aseismic deformation transients in a subduction fault  
655 model, *J. Geophys. Res.*, 112, B09404, doi:10.1029/2007JB004930, 2007.  
656  
657 Maggi, M., Rossetti, F., Corfu, F., Theye, T., Andersen, T.B.: Faccenna, C., Clinopyroxene-rutile  
658 phyllonites from the East Tenda Shear Zone (Alpine Corsica, France): pressure-temperature-time  
659 constraints to the Alpine reworking of Variscan Corsica. *Journal of the Geological Society* 169, 723-  
660 732, 2012.  
661  
662 Magott, R., Fabbri, O., Fournier, M.: Subduction zone intermediate-depth seismicity: Insights from the  
663 structural analysis of Alpine high-pressure ophiolite-hosted pseudotachylytes (Corsica, France). *Journal*  
664 *of Structural Geology* 87, 95-114, 2016.  
665  
666 Magott, R., Fabbri, O., Fournier, M.: Polyphase ductile/brittle deformation along a major tectonic  
667 boundary in an ophiolitic nappe, Alpine Corsica: Insights on subduction zone intermediate-depth  
668 asperities *Journal of Structural Geology* 87, 95-114, 2016.

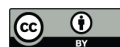

- 669  
670 Malatesta, C., Federico, L., Crispini, L., Capponi, G.: Fluid-controlled deformation in blueschist-facies  
671 conditions: plastic vs brittle behaviour in a brecciated mylonite (Voltri Massif, Western Alps, Italy)  
672 Geological Magazine, doi:10.1017/S0016756816001163, 2017.  
673
- 674 Malasoma, A., Marroni, M., Musumeci, G., Pandolfi, L.: High pressure mineral assemblage in granitic  
675 rocks from continental units in Alpine Corsica, France. Geological Journal, 41, 49–59, 2006  
676
- 677 Mancktelow, N.S.: How ductile are ductile shear zones? *Geology*, 34, 345-348, 2006  
678
- 679 Mancktelow, N.S., and Pennacchioni, G.: The control of precursor brittle fracture and fluidrock  
680 interaction on the development of single and paired ductile shear zones. *Journal of Structural Geology*,  
681 4, 27, 645–661, 2005.  
682
- 683 Massonne, H.J., and Szpurka, Z.: Thermodynamic properties of white micas on the basis of high-  
684 pressure experiments in the systems K<sub>2</sub>O-MgO-Al<sub>2</sub>O<sub>3</sub>-SiO<sub>2</sub>-H<sub>2</sub>O and K<sub>2</sub>O-FeO-Al<sub>2</sub>O<sub>3</sub>-SiO<sub>2</sub>-H<sub>2</sub>O.  
685 *Lithos* 41, 229-250, 1997.  
686
- 687 Mattauer, M., Faure, M. and Malavieille, J.: Transverse lineation and large scale structures related to  
688 Alpine obduction in Corsica. *Journal of Structural Geology*, 3, 401- 409, 1981.  
689
- 690 Mazzoli, S., Vitale, S., Del Monaco, G., Guerriero, G., Margottini, C., and Spizzichino, D.: ‘Diffuse  
691 faulting’ in the Machu Pichu granitoid pluton, Eastern Cordillera, Perú. *Journal of Structural Geology*,  
692 31, 1395- 1408, 2009.  
693
- 694 Meneghini, F., Di Toro, G., Rowe, C. D., Moore, J. C., Tsutsumi, A., and Yamaguchi, A.: Record of  
695 mega-earthquakes in subduction thrusts: The black fault rocks of Pasagshak Point (Kodiak Island,  
696 Alaska), *Geol. Soc. Am. Bull.*, 122(7–8), 1280–1297, 2010.  
697
- 698 Menegon, L., and Pennacchioni, G.: Local shear zone pattern and bulk deformation in the Gran  
699 Paradiso metagranite (NW Italian Alps), *International Journal of Earth Sciences*, 99, 1805-1825, 2010.  
700
- 701 Menegon, L., Piazzolo, S. and Pennacchioni, G.: The effect of Dauphiné twinning on plastic strain in  
702 quartz, *Contributions to Mineralogy and Petrology*, 161, 635-652, 2011.  
703
- 704 Menegon, L., Stünitz, H., Nasipuri, P., Heilbronner, R., and Svahnberg, H.: Transition from fracturing  
705 to viscous ow in granulite facies perthitic feldspar (Lofoten, Norway), *Journal of Structural Geology*,  
706 48, 95-112, 2013.  
707
- 708 Molli, G., Malavieille, J.: Orogenic processes and the Alps/Apennines geodynamic evolution: insights  
709 from Taiwan. *Int J Earth Sci*, 100: 1207-1224, doi: 10.1007/s00531-010-0598-y, 2011.  
710
- 711 Molli, G., Malasoma, A., Meneghini, F.: Brittle precursors of HP/LT microscale shear zone: a case  
712 study from Alpine Corsica. 15<sup>th</sup> Conference of Deformation, Rheology and Tectonics, Zurich, Abstract  
713 Volume, 153, 2005.  
714
- 715 Molli, G.: Localizzazione di zone di taglio HP/LT su precursori fragili: Un esempio dalla Corsica  
716 Alpina, *Rend. Soc. Geol. It.*, 4 Nuova Serie, 270-271, 2007.  
717
- 718 Molli, G.: Northern Apennine-Corsica orogenic system: an updated review. In: Siegesmund, S.,  
719 Fugenschuh, B., Froitzheim, N. (Eds.), *Tectonic Aspects of the Alpine-Dinaride-Carpathian System*.



- 720 Geological Society, London Special Publications, 298, 413- 442, 2008.  
721  
722 Molli, G., White, J.C., Kennedy, L., and Taini, V.: Low-temperature deformation of limestone, Isola  
723 Palmaria, Northern Apennine, Italy - The role of primary textures, precursory veins and intracrystalline  
724 deformation in localization. *Journal of Structural Geology*, 33, 255-270, doi: 10.1016/j.jsg.2010.11  
725 .015, 2011.  
726  
727 Neumann, B.: Texture development of recrystallised quartz polycrystals unravelled by orientation and  
728 misorientation characteristics. *Journal of Structural Geology*, 22, 1695-1711, 2000.  
729  
730 Ozawa, S., Murakami, M., Kaidzu, M., Tada, T., Sagiya, T., Hatanaka, Y., Yarai, H., and Nishimura,  
731 T.: Detection and monitoring of ongoing aseismic slip in the Tokai region, central Japan, *Science*,  
732 298(5595), 1009–1012, 2002.  
733  
734 Passchier, C.W., and Trouw, R.A.J.: *Microtectonics*. Springer. 366p., 2011.  
735  
736 Pec, M., Stünitz, and Heilbronner, R.: Semi-brittle deformation of granitoid gouges in shear experiments  
737 at elevated pressures and temperatures, *Journal of Structural Geology*, 38, 200-221, 2012.  
738  
739 Peng, Z., and Gomberg, J.: An integrated perspective of the continuum between earthquakes and slow  
740 slip phenomena, *Nature Geoscience*, 3, 599–607, 2010.  
741  
742 Pennacchioni, G.: Control of the geometry of precursor brittle structures on the type of ductile shear  
743 zone in the Adamello tonalites, Southern Alps (Italy), *Journal of Structural Geology*, 27, 627-644, 2005  
744  
745 Pennacchioni, G., and Mancktelow, N.S.: Nucleation and initial growth of a shear zone network within  
746 compositionally and structurally heterogeneous granitoids under amphibolite facies conditions, *Journal*  
747 *of Structural Geology*, 29, 1757-1780, 2007.  
748  
749 Pennacchioni, G., and Zucchi, E.: High temperature fracturing and ductile deformation during cooling  
750 of a pluton: The Lake Edison granodiorite (Sierra Nevada batholith, California), *Journal of Structural*  
751 *Geology*, 50, 54-81, 2013.  
752  
753 Pennacchioni, G., Di Toro, G., Brack, P., Menegon, L., and Villa, I.M.: Brittle–ductile–brittle  
754 deformation during cooling of tonalite (Adamello, Southern Italian Alps), *Tectonophysics* 427, 171–  
755 197, 2006.  
756  
757 Pittarello, L., Pennacchioni, G., and Di Toro, G.: Amphibolite-facies pseudotachylytes in Premosello  
758 metagabbro and felsic mylonites (Ivrea Zone, Italy), *Tectonophysics*, 580, 43-57, 2012.  
759  
760 Platt, J.P., and Behr, W.M.: Lithospheric shear zones as constant stress experiments, *Geology*, 39, 127-  
761 130, doi: 10.1130/G31561.1, 2011.  
762  
763 Polino, R., Dal Piaz, G.V., and Gosso, G.: Tectonic erosion at the Adria margin and accretionary  
764 process for the Cretaceous orogeny of the Alps. In: Roure, F., Heitzman, P., and Polino, R. (eds) *Deep*  
765 *Structure of the Alps*. Volume Speciale Società Geologica Italiana, Roma, 1, 345–367, 1990.  
766  
767 Prior, D.J., Wheeler, J., Peruzzo, L., Spiess, R., and Storey, G.: Some garnet microstructures: an  
768 illustration of the potential of orientation maps and misorientation analysis in microstructural studies.  
769 *Journal of Structural Geology*, 24, 999-1011, 2002.  
770

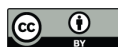

- 771  
772 Ramsay, J.G., and Graham, R.H.: Strain variation in shear belts. *Canadian Journal Earth Science* 7,  
773 786–813, 1970.  
774  
775 Rosenberg, C., and Kissling, E.: Three-dimensional insight into Central-Alpine collision: Lower-plate  
776 or upper-plate indentation? *Geology*, 41, 1219-1222, doi:10.1130/G34584.1, 2013.  
777  
778 Rossi, P., Durand-Delga, M., Lahondère, J. C., and Lahondère, D.: Carte géologique de la France à  
779 1/50.000, feuille Santo Pietro di Tenda, BRGM, 2003.  
780  
781 Rutter, E. H: On the nomenclature of mode of failure transitions in rocks, *Tectonophysics*, 122 (3-4),  
782 381- 387. 1986.  
783  
784 Schiffman, P., and Day, H.W.: Petrologic methods for the study of Very Low-grade metabasites in  
785 Low-Grade metamorphism (eds M. Frey and D. Robinson), Blackwell Publishing Ltd., Oxford, UK:  
786 doi: 10.1002/9781444313345.ch4, 2009.  
787  
788 Schmid, S.M., and Handy, M.R.: Towards a genetic classification of fault rocks: Geological usage and  
789 tectonophysical implications, in Muller, D.W., et al., eds., *Controversies in modern geology*: London,  
790 Academic Press, 339–361. 1991.  
791  
792 Schmid, S. M., Pfiffner, O.A., Froitzheim, N., Schonborn, G. and Kissling, E., Geophysical-geological  
793 transect and tectonic evolution of the Swiss-Italian Alps. *Tectonics*, 12, 1036-1064: 1996.  
794  
795 Scholz, C.H.: The brittle-plastic transition and the depth of seismic faulting. *Geologische Rundschau*,  
796 77, 319-328, 1988.  
797  
798 Scholz, C.H.: *The Mechanics of Earthquakes and Faulting*, 2nd ed., Cambridge University Press, 2002.  
799  
800 Segall, P., and Simpson, C.: Nucleation of ductile shear zones on dilatant fractures, *Geology*, 14, 56–  
801 59, 1986.  
802  
803 Shimamoto, T.: The origin of S-C mylonites and a new fault-zone model, *Journal of Structural*  
804 *Geology* 11, 51-64, 1989.  
805  
806 Shimamoto, T., Logan, J.M. Velocity-dependent behaviours of simulated halite shear zones: an analog  
807 for silicates. *Am. Geophys. Mongr.*, 37, 49-63, 1986.  
808  
809 Sibson, R.H.: Fault rocks and fault mechanisms, *Journal of the Geological Society of London*, 133, 191-  
810 213, 1977.  
811  
812 Sibson, R.H: Transient discontinuities in ductile shear zones, *Journal of Structural Geology*, 2, 165–  
813 171, 1980.  
814  
815 Sibson, R.H.: Continental fault structure and the shallow earthquake source, *Journal of the Geological*  
816 *Society of London*, 140, 741-767, 1983.  
817  
818 Sibson, R.H.: A note on fault reactivation, *Journal of Structural Geology* 7, 751–754, 1985.  
819  
820 Simpson, C.: Deformation of granitic rocks across the brittle-ductile transition, *Journal of Structural*  
821 *Geology* 7: 503-511, 1985.



- 822  
823  
824 Simpson, C.: Fabric development in brittle-to-ductile shear zones, *Pure and Applied Geophysics* 124 (1-  
825 2), 269–288, 1986.  
826  
827 Stipp, M., Stunitz, H., Heilbronner, R. and Schmid, S.M.: The eastern Tonale fault zone: a ‘natural  
828 laboratory’ for crystal plastic deformation of quartz over a temperature range from 250 to 700 °C. *J*  
829 *Struct Geol*, 24, 1861-1884, 2002.  
830  
831 Stipp, M., and Tullis, J.: The recrystallized grain size piezometer for quartz, *Geophysical Research*  
832 *Letters*, 30, 21, 2088, doi:10.1029/2003GL018444, 2003.  
833  
834 Stöckhert, B.: Stress and deformation in subduction zones - insight from the record of exhumed  
835 metamorphic rocks, in *Geological Society of London Special Publication*, S. de Meer, et al., Editors.:  
836 London, 255-274, 2002.  
837  
838 Takagi, H., Goto, K., Shigematsu, N. Ultramylonite bands derived from cataclasite and  
839 pseudotachylyte in granites, northeast Japan., *J Struct Geol*, 22, 1325-1339, 2000.  
840  
841 Tödheide, K.: Water at high temperatures and pressures, in *Water: A Comprehensive Treatise*, vol. 1,  
842 edited by F. Franks, chap. 13, pp. 463–514, Springer, New York, 1972.  
843  
844 Trepmann, C.A., Stockhert, B., Dorner, D., Moghadam, E.H., Kuster, M. and Roller, K.: Simulating  
845 coseismic deformation of quartz in the middle crust and fabric evolution during postseismic stress  
846 relaxation – an experimental study. *Tectonophysics* 442, 83–104, 2007.  
847  
848 Tribuzio, R., and Giacomini, F., Blueschist facies metamorphism of peralkaline rhyolites from the  
849 Tenda crystalline massif (northern Corsica): evidence for involvement in the Alpine subduction event?  
850 *Journal of Metamorphic Geology* 20, 513-526, 2002.  
851  
852 Van Daalen, M., Heilbronner, R., Kunze, K.: Orientation analysis of localized shear deformation in  
853 quartz fibres at the brittle–ductile transition, *Tectonophysics*, 303, 83-107, 1999.  
854  
855 Vannucchi, P., Remitti, F., and Bettelli, G.: Geological record of fluid flow and seismogenesis along  
856 an erosive subducting plate boundary, *Nature*. 451, 7179,699-703, 2008.  
857  
858 Vernooij, M. G., den Brok, B., and Kunze, K.: Development of crystallographic preferred orientations  
859 by nucleation and growth of new grains in experimentally deformed quartz single crystals,  
860 *Tectonophysics*, 427, 35–53, 2006a.  
861  
862 Vernooij, M.G.C., Kunze, K. and den Brok, B.: ‘Brittle’ shear zones in experimentally deformed quartz  
863 single crystals. *J Struct Geol* 28: 1292–1306, 2006b  
864  
865 Viola, G., Mancktelow, N. S., and Miller, J. A.: Cyclic frictional– viscous slip oscillations along the  
866 base of an advancing nappe complex: insights into brittle-ductile nappe emplacement mechanisms from  
867 the Naukluft Nappe Complex, central Namibia, *Tectonics*, 25, TC3016, doi:10.1029/2005 tc 001939,  
868 2006.  
869  
870 Vitale Brovarone, A., Beyssac, Ol., Malavieille, J., Molli, G., Beltrando, M., and Compagnoni, R.  
871 Stacking and metamorphism of continuous segments of subducted lithosphere in a high-pressure wedge:

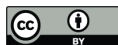

- 872 The example of Alpine Corsica (France). *Earth-Science Reviews*, 116, 35–56, 2013.  
873
- 874 Wallace, L.M. and Beavan, J.: Diverse slow slip behavior at the Hikurangi subduction margin, New  
875 Zealand, *Journal of Geophysical Research*, 115, B12402, doi:10.1029/2010JB007717, 2010.  
876
- 877 White, J.C. and White, S.H.: Semi-brittle deformation within the Alpine fault zone, New Zealand. *J*  
878 *Struct Geol* 5: 579-589, 1982  
879
- 880 White, J.C.: Transient discontinuities revisited: Pseudotachylyte, plastic instability and the influence of  
881 low pore fluid pressure on deformation processes in the mid-crust. *J Struct Geol* 18: 1471-1477, 1996.  
882
- 883 Zibra, I., Kruhl, J.H., and Braga, R.: Late Palaeozoic deformation of post-Variscan lower crust: shear  
884 zone widening due to strain localization during retrograde shearing, *International Journal of Earth*  
885 *Sciences*, 99, 973-991, 2010.  
886  
887  
888  
889  
890  
891



892 **Figures list and caption**

893

894 Fig.1 a) Alpine Corsica within the Alps/Apennine framework. b) Tectonic map of north Corsica  
895 showing the main tectonic units and the area of studied sample. 1,2) Corsican continental crust, mainly  
896 Carboniferous-Permian granitoids, their host pre-Carboniferous basement and a Mesozoic to Eocene  
897 cover: (1a) “autochthonous” Hercynian Corsica and (1b) greenschist/lower-blueschist external  
898 continental units (Corte; Popolasca); 2) inner continental units: (2a) upper-blueschist units (Tenda  
899 Massif; Centuri) and (2b) eclogite slices (Serra di Pigno-Farinole); 3) Schistes Lustres nappe  
900 (undifferentiated); 4) Nappe Superiore i.e. upper non-metamorphic units (Balagne, Nebbio and  
901 Macinaggio units); 6) Miocene sediments; c) Regional cross-section with indication of study sample  
902 from Popolasca area.

903

904 Fig.2. Mesoscopic view of the analyzed sample: protomylonitic metagranite host with millimetre-scale  
905 ultramylonite localized after brittle precursor. All observable deformation structures were developed  
906 under HP/LT metamorphic conditions.

907

908 Fig.3. Microscopic views of host-rock showing Quartz microstructures typical of low temperature  
909 plasticity: a) intracrystalline deformation (undulatory extinction, deformation lamellae, deformation  
910 bands, localized extinction bands, LEBs) associated with recrystallization along intragranular conjugate  
911 shear bands sets; b) brittle fracturing in domino-style of K-feldspar associated with K-feldspar  
912 breakdown to albite, stilpnomelane and phengite; c) quartz deformation lamellae and intergranular  
913 recrystallization by bulging; d) K-feldspar intergranular recrystallization and albite-neocrystallization,  
914 recrystallization also observable along later cracks and microfractures (horizontal to sub-horizontal).

915

916 Fig.4 a) BSE image of the metamorphic mineral assemblage in the host granitoids of the studied  
917 sample; Ab, albite; Amp, Na-amphibole; Kfs, K-feldspar; Phe, phengite; Qtz, quartz; b) composition of  
918 sodic amphiboles, using the classification of Leake et al. (1997); c) estimated peak-metamorphic  
919 pressure/temperature conditions for the studied sample (cross-hatched area) constrained by the  
920 reactions indicated.

921

922 Fig.5 a) Microscopic view of millimetre-scale shear zone nucleated after brittle precursor, with  
923 indication of the structural-compositional domains within the shear zone. Domain 1 relict domain of  
924 cataclasite; Domain 2 phyllonite; Domain 3 ultramylonite; b) detail of the sharp shear-zone boundary  
925 heritage of former host-fracture contact and ultramylonite to phyllonite transition within the microscale





926 shear zone are well observable; c) detail of domain 1, relict domain of cataclasite, mainly K-feldspar  
927 dominated. Angular fragments of variable size are indicative of brittle comminution.

928

929 Fig. 6 Microscopic view of ultramylonite; a) synkinematic Na-amphibole, boudinaged within the  
930 quartz and albite ultramylonite matrix; b) Quartz and albite recrystallized matrix, in the lower part the  
931 boundary of microscale shear zone with an host quartz porphyroclast; c) Quartz-ribbon with a strong  
932 elongation (1:15, X/Z ratio) defining a shape preferred orientation oblique ( $15^\circ$ ) to the shear zone  
933 boundary; d) detail of quartz recrystallization in the ribbon porphyroclast and matrix.

934

935 Fig. 7. EBSD analysis of quartz in the host protomylonite. (a) Microstructure of the analysed site. The  
936 white arrows indicate localized extinction bands that have been analysed with the boundary trace  
937 analysis and misorientation profiles as shown in Figs. 7b-g. (b) Inverse Pole Figure Map with the  
938 respect to the protomylonitic foliation in the host rock (vertical in the figure). Location of subset 1 and 2  
939 and trace of misorientation profiles 1-3 are shown. (c) Pole figure of the host grain, colour coded per the  
940 quartz inverse pole figure shown in (b). (d) Pole figure of recrystallized quartz in the intracrystalline  
941 bands. The blue and red line indicates the average orientation of the trace of the intracrystalline bands  
942 with a subset 1 and 2 orientation, respectively. (e) Boundary trace analysis of the localized extinction  
943 band of subset 1. (f) Boundary trace analysis of the localized extinction band of subset 2. (g) Point-to-  
944 point misorientation profiles. See (b) for location of the traces of the profiles. (h) Misorientation axis of  
945 the host grain and of the recrystallized grains in sample coordinates.

946

947 Fig. 8. EBSD analysis of quartz in the ultramylonite. (a) Microstructure of the recrystallized quartz from  
948 domain 3 in the ultramylonite. (b) Pole figure of recrystallized quartz grains from (a). Only grains from  
949 recrystallized ribbons in the ultramylonite were analysed.

950

951 Fig.9. a) Brittle failure analysis for our studied sample, see text for assumptions and approximations.  
952 For the differential stress range and the vertical stress considered, brittle failure requires  
953 (sub)lithostathic fluid pressure ( $0.96 < \lambda < 1$ ) whereas viscous deformation at the estimated depth range  
954 (23-30 km) is only possible for pore fluid pressure  $\leq 0.94$ ; b) Rheological profile calculated for a fixed  
955 strain rate of  $10^{-12} \text{ s}^{-2}$  (see text for calculation details) using the quartz flow law of Hirth et al. (2001).  
956 Cycle of switching in deformation style and mechanisms is suggested for the analyzed sample in its  
957 ambient depth-range. Frictional Byerlee envelope is calculated using an average friction coefficient of  
958 0.7 for various pore fluid pressure ratio values (Fig.9a and text). Stress estimates based on recrystallized  
959 quartz piezometry (grey shaded area) have been calculated following Stipp and Tullis, (2003).



960

961

962 Fig.10. a) Simplified view of the ancient subduction of the corsican continental crust, with indication  
963 where the mechanical coupling is the highest (seismogenic zone) and lowest (stable slip). The white  
964 rectangle corresponds to the inferred zone of the studied sample. The pink to red shading figured the  
965 lower to higher blueschist- to eclogite-facies peak metamorphism in continental-derived crustal units;  
966 b,c,d Multi-stage scenario for development of the association of granitic protomylonites and  
967 ultramylonites from brittle precursors in the Popolasca area: a) General sketch showing the east-dipping  
968 ancient alpine subduction of the corsican continental crust. b): Formation of crustal scale anastomosed  
969 network of shear zones within the host granitic crust, active distributed deformation with aseismic  
970 creep; c: Formation of brittle instabilities (stage 2) in the shear zone by seismic ruptures nucleated along  
971 the subduction interface (1) or the core of granites (2) and having propagated across and beyond the  
972 granitic mylonites, followed by post-seismic creep, with localization of shear zone after brittle precursor  
973 (stage 3); d) Formation of brittle instabilities by seismic tremors and slow-slip events followed by post-  
974 seismic (post-tremors) creep.

975

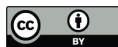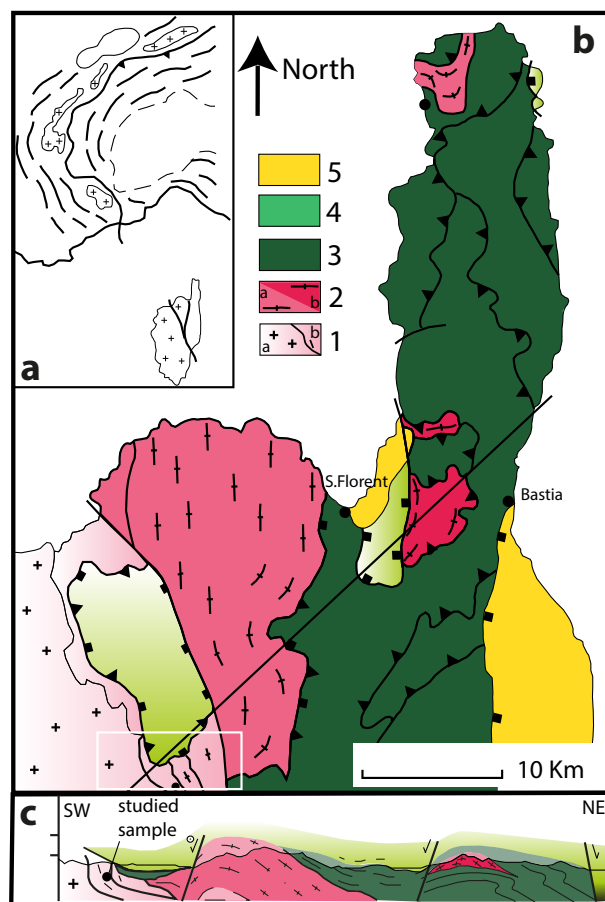

**Fig.01**

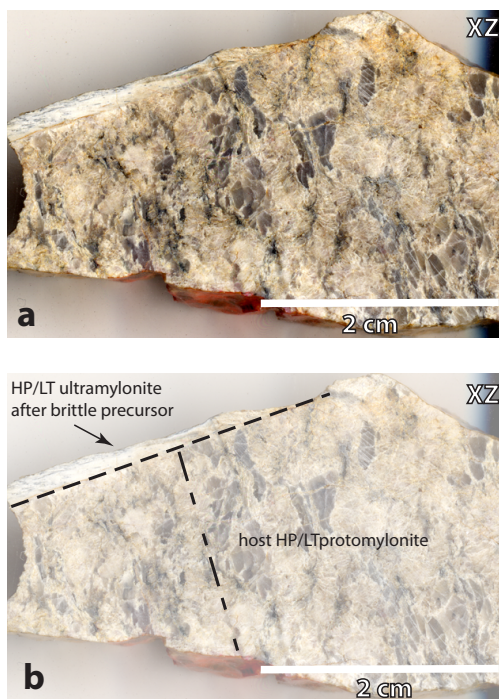

**Fig.02**

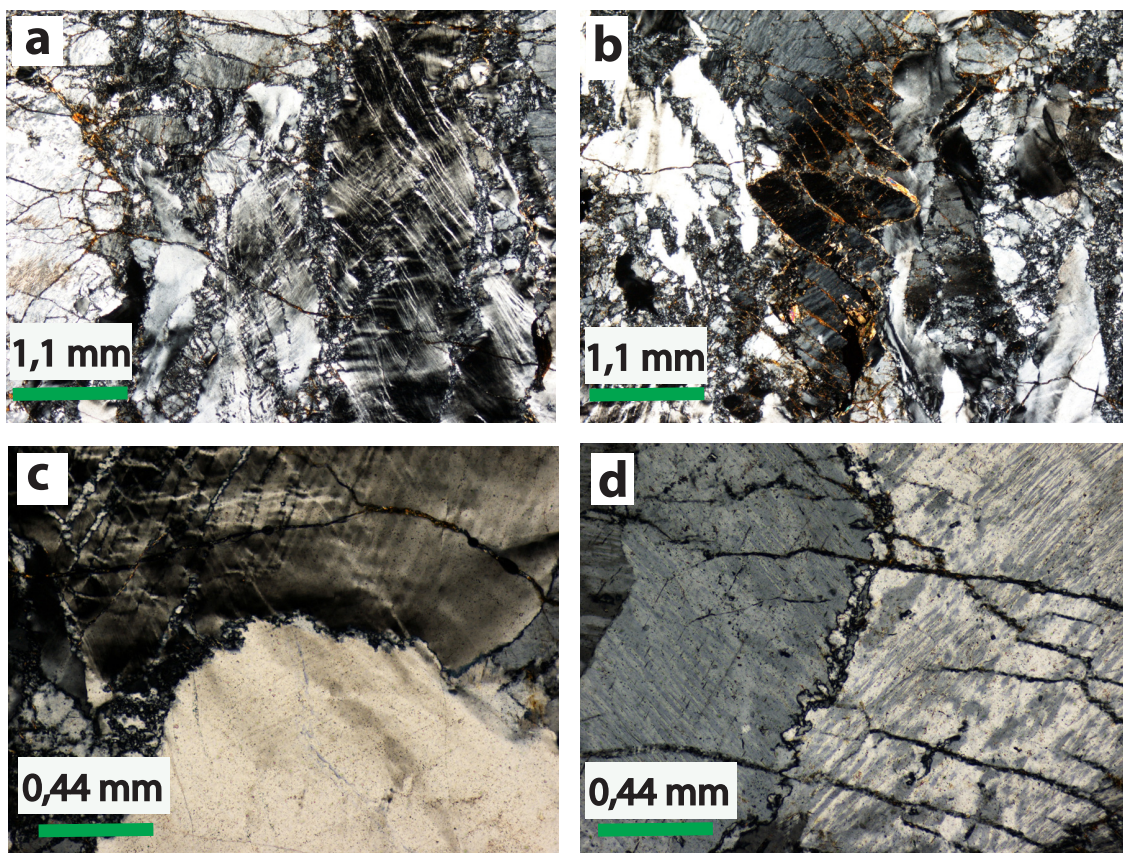

**Fig.03**

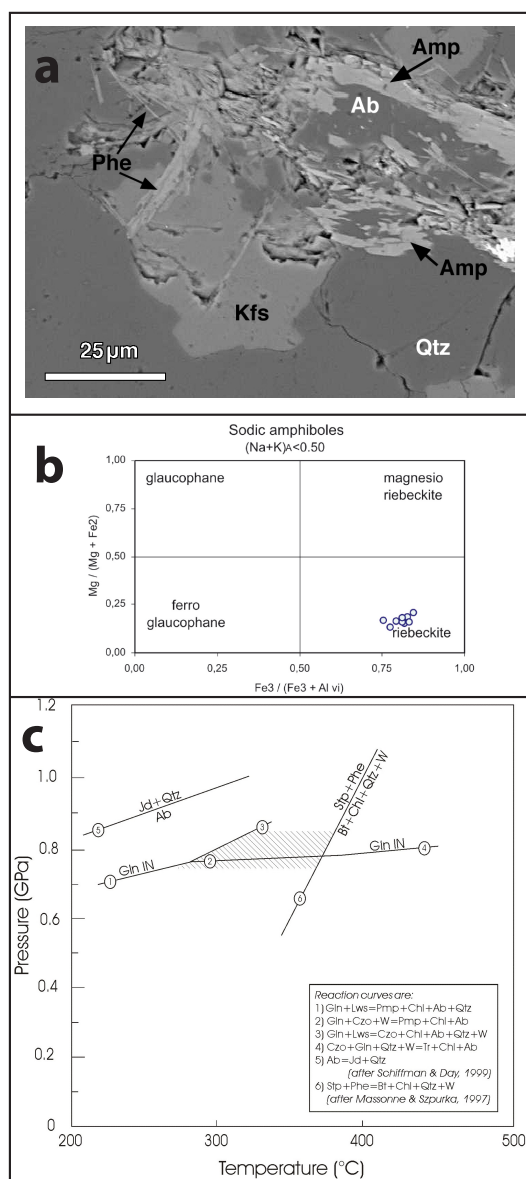

Fig.04

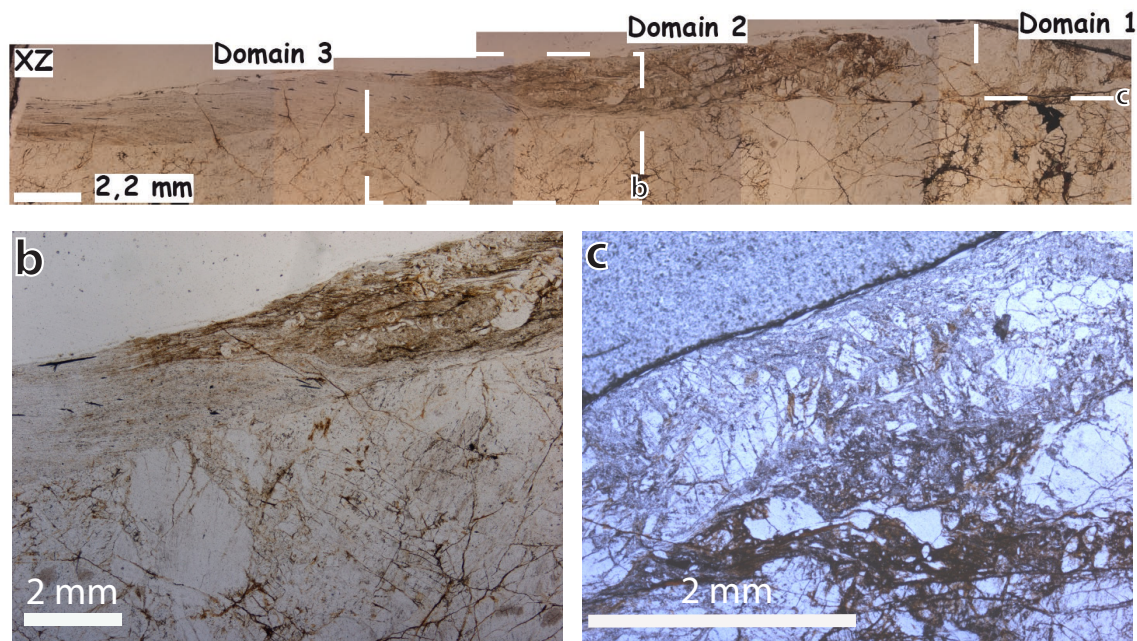

**Fig.05**

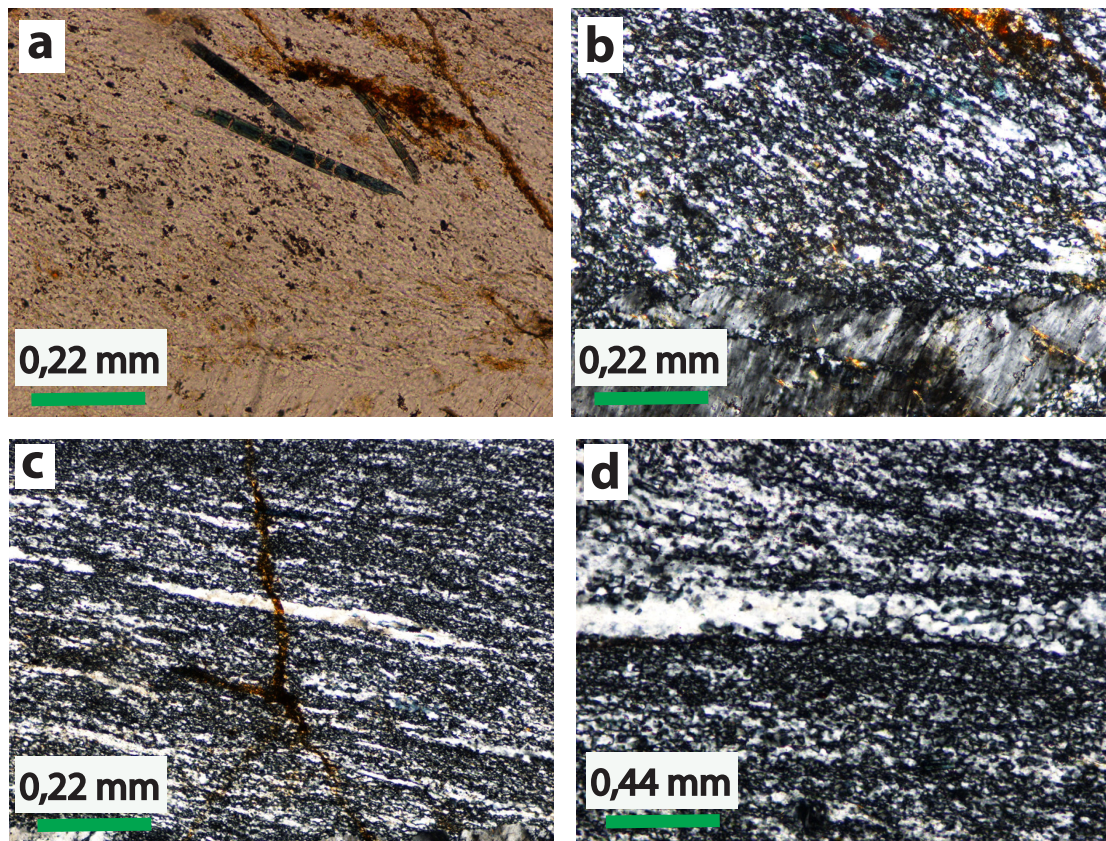

**Fig.06**



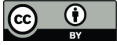

Fig.07

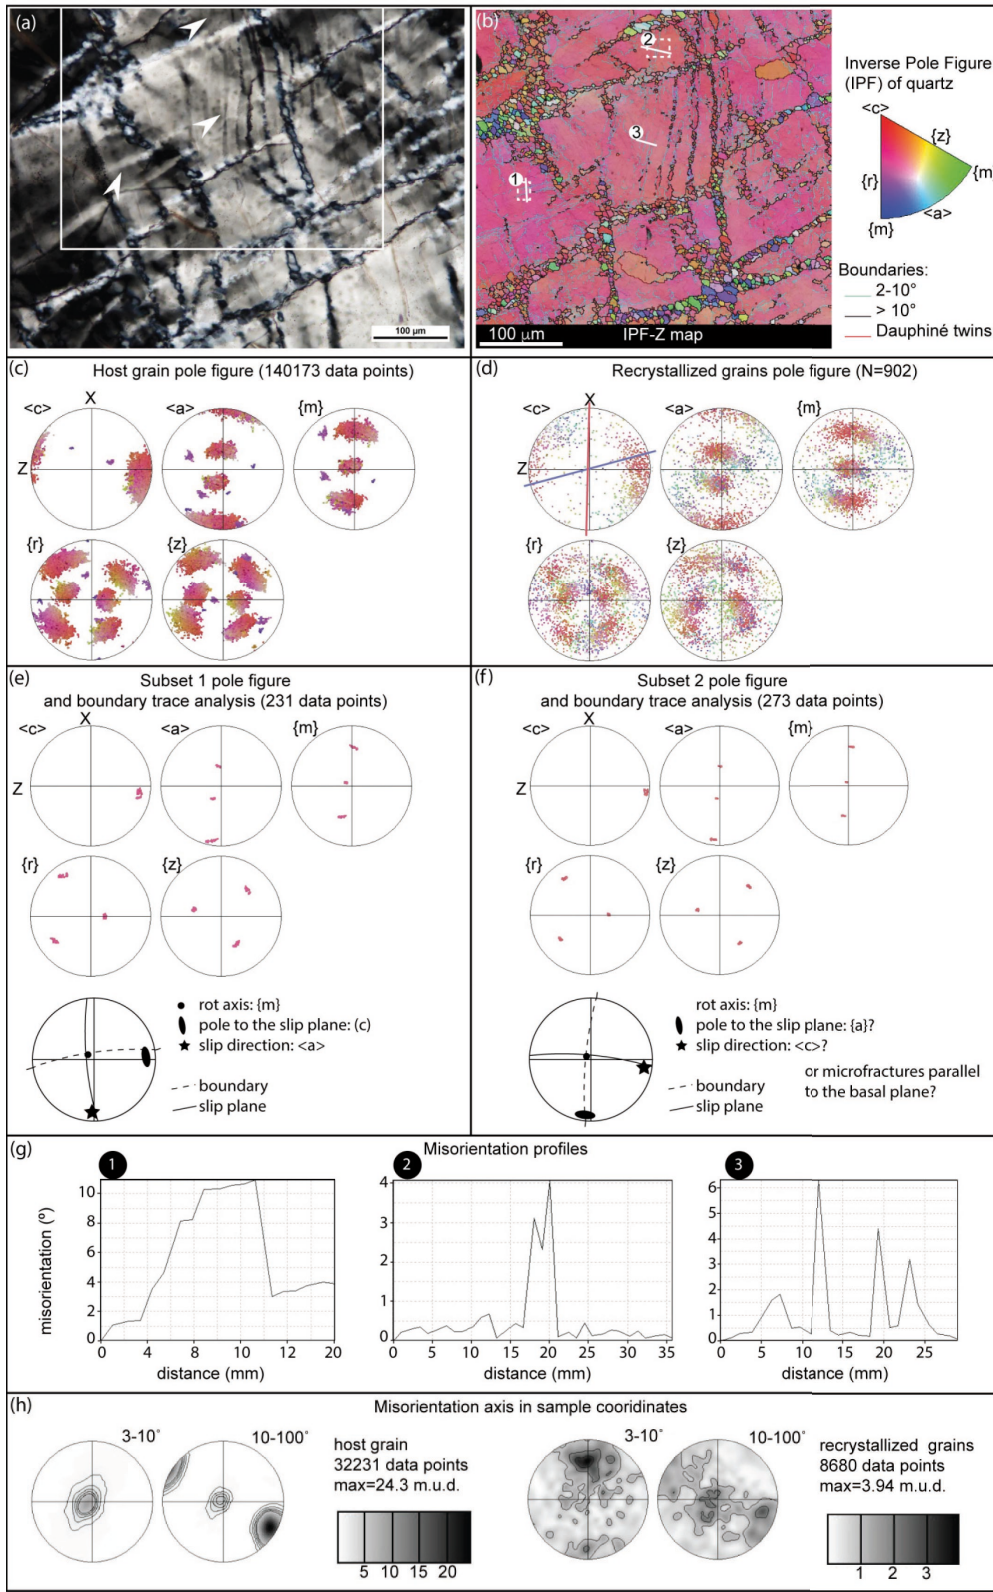

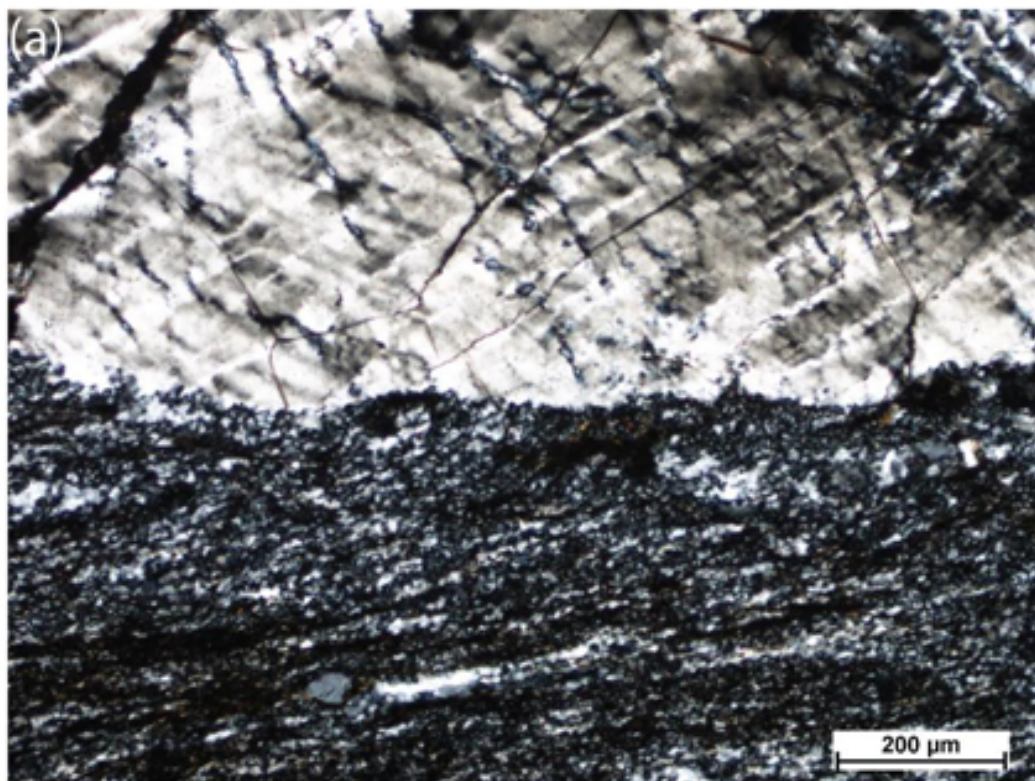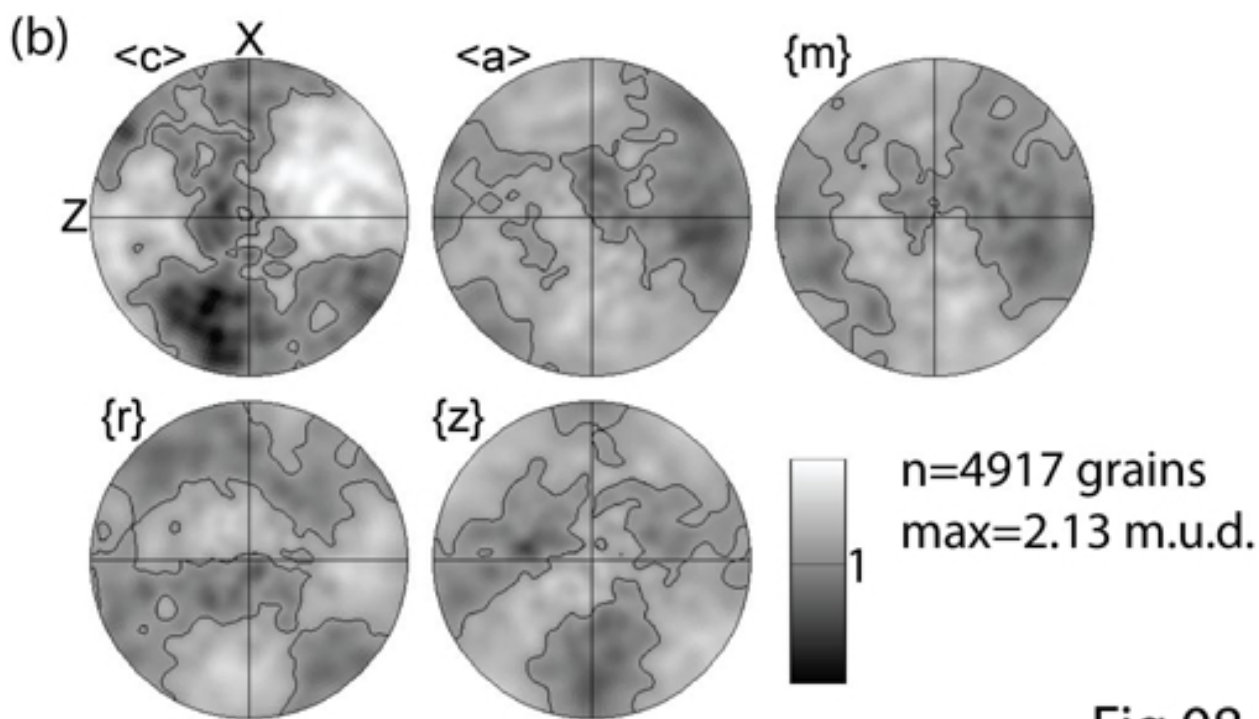

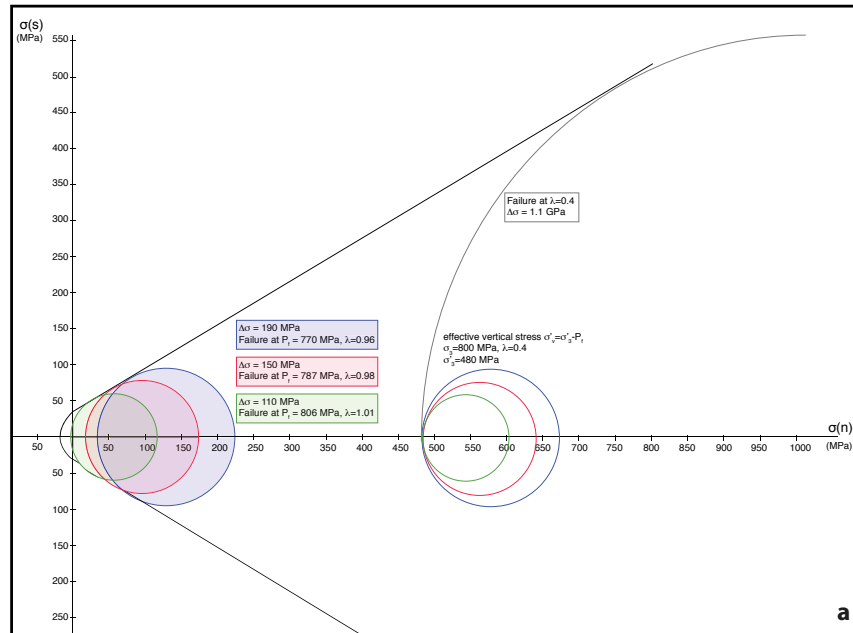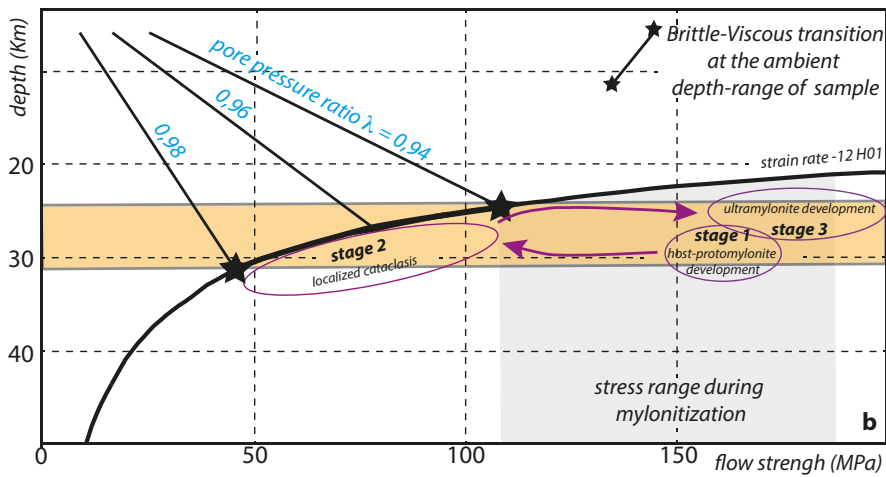

Fig.09

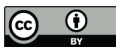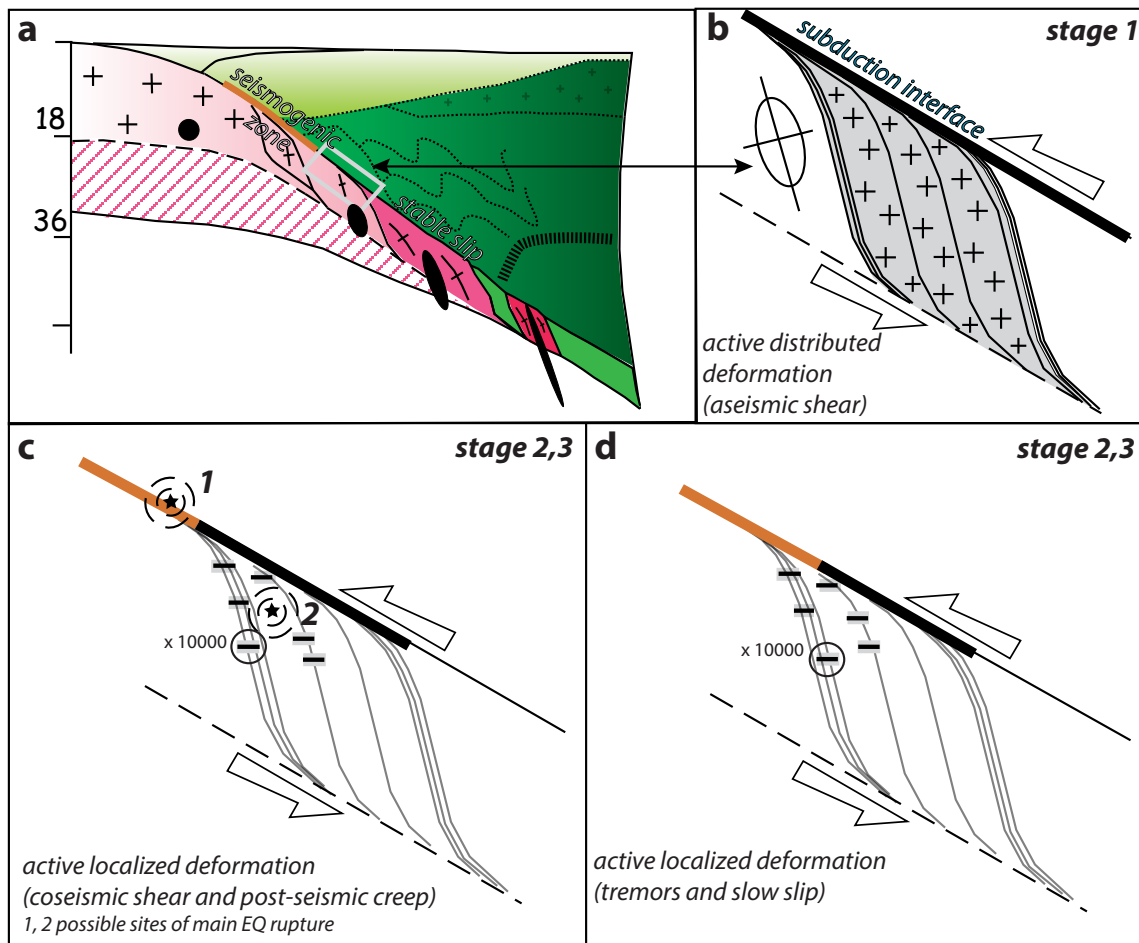

**Fig.10**



| <b>Amphibole</b>           | Am1   | Am3   | Am4   | Am5   | Am6N  | Am6B  | Am7   | <b>Stilpnomeli</b>        | Fill1  | Fill2  | Fill3  | Fill4  |
|----------------------------|-------|-------|-------|-------|-------|-------|-------|---------------------------|--------|--------|--------|--------|
| <b>Wt%</b>                 |       |       |       |       |       |       |       | <b>Wt%</b>                |        |        |        |        |
| SiO2                       | 51,58 | 51,30 | 50,62 | 50,97 | 50,28 | 50,61 | 52,62 | SiO2                      | 45,20  | 48,73  | 40,85  | 42,13  |
| TiO2                       | 0,35  | 0,32  | 0,52  | 0,74  | 0,20  | 0,39  | 0,16  | TiO2                      | 0,13   | 0,07   | 0,30   | 0,18   |
| Al2O3                      | 1,67  | 1,89  | 1,97  | 1,73  | 2,22  | 1,85  | 2,59  | Al2O3                     | 21,19  | 12,22  | 17,08  | 20,28  |
| Cr2O3                      | 0,00  | 0,00  | 0,00  | 0,00  | 0,00  | 0,00  | 0,00  | Cr2O3                     | -      | 0,11   | -      | -      |
| FeO                        | 28,13 | 29,65 | 28,80 | 28,77 | 30,25 | 30,18 | 27,94 | FeO                       | 13,54  | 20,45  | 19,60  | 16,13  |
| MnO                        | 0,00  | 0,15  | 0,00  | 0,20  | 0,00  | 0,00  | 0,00  | MnO                       | -      | 0,16   | -      | -      |
| MgO                        | 2,24  | 1,86  | 1,97  | 2,16  | 1,64  | 1,98  | 1,90  | MgO                       | 2,39   | 0,95   | 1,94   | 1,92   |
| CaO                        | 0,06  | 0,05  | 0,10  | 0,09  | 0,13  | 0,14  | 0,06  | CaO                       | 0,16   | 0,20   | 0,29   | 0,32   |
| Na2O                       | 6,44  | 6,63  | 6,66  | 6,79  | 6,02  | 6,42  | 6,88  | Na2O                      | 0,16   | 1,00   | 0,37   | 0,26   |
| K2O                        | 0,41  | 0,39  | 0,46  | 0,38  | 0,35  | 0,43  | 0,71  | K2O                       | 4,68   | 3,00   | 5,05   | 4,89   |
| TOT                        | 90,88 | 92,24 | 91,10 | 91,33 | 91,09 | 92,00 | 92,86 | TOT                       | 87,45  | 86,89  | 85,48  | 86,11  |
| <b>Cations</b>             |       |       |       |       |       |       |       | <b>Cations</b>            |        |        |        |        |
| Si                         | 8,16  | 8,09  | 8,09  | 8,11  | 8,07  | 8,05  | 8,17  | Si                        | 7,418  | 8,292  | 7,235  | 7,200  |
| Al IV                      | 0,00  | 0,00  | 0,00  | 0,00  | 0,00  | 0,00  | 0,00  | Al vi                     | 1,582  | 0,708  | 1,765  | 1,800  |
| Sum T                      | 8,16  | 8,09  | 8,09  | 8,11  | 8,07  | 8,05  | 8,17  | Sum Z                     | 9,000  | 9,000  | 9,000  | 9,000  |
| Al VI                      | 0,31  | 0,35  | 0,37  | 0,32  | 0,42  | 0,35  | 0,47  | Al iv                     | 2,516  | 1,743  | 1,800  | 2,284  |
| Fe3+                       | 1,70  | 1,56  | 1,42  | 1,54  | 1,46  | 1,50  | 1,45  | Ti                        | 0,016  | 0,009  | 0,040  | 0,023  |
| Ti                         | 0,04  | 0,04  | 0,06  | 0,03  | 0,02  | 0,05  | 0,02  | Cr                        | 0,000  | 0,015  | 0,000  | 0,000  |
| Cr                         | 0,00  | 0,00  | 0,00  | 0,00  | 0,00  | 0,00  | 0,00  | Fe3+                      | 0,000  | 0,000  | 0,000  | 0,000  |
| Mg                         | 0,53  | 0,44  | 0,47  | 0,51  | 0,39  | 0,47  | 0,44  | Fe2+                      | 1,858  | 2,909  | 2,902  | 2,304  |
| Fe2+                       | 2,02  | 2,35  | 2,43  | 2,28  | 2,61  | 2,51  | 2,18  | Mn                        | 0,000  | 0,023  | 0,000  | 0,000  |
| Mn                         | 0,00  | 0,02  | 0,00  | 0,03  | 0,00  | 0,00  | 0,00  | Sum Y                     | 0,584  | 0,241  | 0,512  | 0,489  |
| Sum C                      | 4,60  | 4,76  | 4,75  | 4,71  | 4,90  | 4,88  | 4,56  | Ca                        | 4,974  | 4,939  | 5,254  | 5,100  |
| Mg                         | 0,00  | 0,00  | 0,00  | 0,00  | 0,00  | 0,00  | 0,00  | Na                        | 0,028  | 0,036  | 0,055  | 0,059  |
| Mn                         | 0,00  | 0,00  | 0,00  | 0,00  | 0,00  | 0,00  | 0,00  | K                         | 0,979  | 0,651  | 1,141  | 1,066  |
| Fe2+                       | 0,00  | 0,00  | 0,00  | 0,00  | 0,00  | 0,00  | 0,00  | Sum X                     | 1,058  | 1,017  | 1,323  | 1,210  |
| Ca                         | 0,01  | 0,01  | 0,02  | 0,02  | 0,02  | 0,02  | 0,01  | TOT                       | 15,032 | 14,956 | 15,576 | 15,311 |
| Na                         | 1,97  | 1,99  | 1,98  | 1,98  | 1,87  | 1,98  | 1,99  | - : below detection limit |        |        |        |        |
| Sum B                      | 1,98  | 2,00  | 2,00  | 2,00  | 1,89  | 2,00  | 2,00  |                           |        |        |        |        |
| Na                         | 0,00  | 0,04  | 0,08  | 0,11  | 0,00  | 0,00  | 0,08  |                           |        |        |        |        |
| K                          | 0,08  | 0,08  | 0,09  | 0,08  | 0,07  | 0,09  | 0,14  |                           |        |        |        |        |
| Sum A                      | 0,08  | 0,12  | 0,17  | 0,19  | 0,07  | 0,09  | 0,22  |                           |        |        |        |        |
| TOT                        | 14,82 | 14,97 | 15,01 | 15,01 | 14,93 | 15,02 | 14,95 |                           |        |        |        |        |
| - : below detection limits |       |       |       |       |       |       |       |                           |        |        |        |        |

| <b>Feldspar</b> | K-feld | K-feld | K-feld | K-feld | Albite | Albite | K-Feld | Albite | Albite | K-feld | Albite |
|-----------------|--------|--------|--------|--------|--------|--------|--------|--------|--------|--------|--------|
| <b>Wt%</b>      |        |        |        |        |        |        |        |        |        |        |        |
| SiO2            | 64,47  | 68,51  | 63,50  | 64,25  | 68,06  | 67,82  | 64,35  | 68,12  | 67,75  | 63,98  | 68,33  |
| TiO2            | -      | -      | -      | -      | -      | -      | 0,02   | -      | -      | -      | 0,07   |
| Al2O3           | 18,75  | 20,33  | 18,32  | 18,66  | 20,50  | 19,84  | 18,28  | 19,43  | 20,20  | 18,91  | 20,43  |
| Cr2O3           | -      | -      | -      | -      | -      | -      | -      | -      | -      | -      | -      |
| FeO             | -      | 0,15   | -      | -      | 0,13   | -      | -      | 0,27   | 0,09   | 0,11   | -      |
| MnO             | -      | -      | -      | -      | -      | -      | 0,03   | -      | -      | -      | 0,07   |
| MgO             | -      | -      | 0,04   | -      | 0,04   | -      | -      | -      | -      | -      | -      |
| CaO             | -      | -      | -      | -      | -      | 0,03   | -      | -      | -      | -      | -      |
| Na2O            | 2,44   | 0,18   | 0,17   | 0,19   | 11,03  | 11,44  | -      | 11,31  | 11,56  | 0,20   | 11,17  |
| K2O             | 13,48  | 9,05   | 16,32  | 14,72  | 0,28   | 0,05   | 15,74  | 0,16   | 0,04   | 14,39  | 0,56   |
| TOT             | 99,14  | 98,22  | 98,35  | 97,82  | 100,04 | 99,18  | 98,42  | 99,29  | 99,64  | 97,59  | 100,63 |
| <b>Cations</b>  |        |        |        |        |        |        |        |        |        |        |        |
| Si              | 11,92  | 12,25  | 11,95  | 12,02  | 11,88  | 11,93  | 12,03  | 11,99  | 11,88  | 11,98  | 11,88  |
| Al              | 4,09   | 4,28   | 4,06   | 4,11   | 4,22   | 4,11   | 4,03   | 4,03   | 4,17   | 4,17   | 4,18   |
| Sum Z           | 16,01  | 16,53  | 16,02  | 16,13  | 16,09  | 16,05  | 16,06  | 16,01  | 16,05  | 16,16  | 16,06  |
| Fe3+            | 0,00   | 0,00   | 0,00   | 0,00   | 0,00   | 0,00   | 0,00   | 0,00   | 0,00   | 0,00   | 0,00   |
| Fe2+            | 0,00   | 0,02   | 0,00   | 0,00   | 0,02   | 0,00   | 0,00   | 0,04   | 0,01   | 0,02   | 0,00   |
| Mg              | 0,00   | 0,00   | 0,01   | 0,00   | 0,01   | 0,00   | 0,00   | 0,00   | 0,00   | 0,00   | 0,00   |
| Ca              | 0,00   | 0,00   | 0,00   | 0,00   | 0,01   | 0,00   | 0,00   | 0,00   | 0,00   | 0,00   | 0,00   |
| Na              | 0,87   | 0,06   | 0,06   | 0,07   | 3,73   | 3,90   | 0,00   | 3,86   | 3,93   | 0,07   | 3,76   |
| K               | 3,18   | 2,06   | 3,92   | 3,51   | 0,06   | 0,01   | 3,75   | 0,04   | 0,01   | 3,44   | 0,12   |
| Sum X           | 4,05   | 2,15   | 3,99   | 3,58   | 3,82   | 3,92   | 3,75   | 3,93   | 3,95   | 3,53   | 3,89   |
| TOT             | 20,06  | 18,88  | 20,01  | 19,71  | 19,91  | 19,97  | 19,82  | 19,95  | 20,00  | 19,68  | 19,95  |
| <b>%Ab</b>      | 21,58  | 2,93   | 1,56   | 1,92   | 98,36  | 99,57  | 0,00   | 99,08  | 99,77  | 2,07   | 96,81  |
| <b>%An</b>      | 0,00   | 0,00   | 0,00   | 0,00   | 0,00   | 0,14   | 0,00   | 0,00   | 0,00   | 0,00   | 0,00   |
| <b>%Or</b>      | !#S%   | &#!    | &#S%   | &#"    | (#)S   | ##&    | ("#)   | ##%    | ##*    | &!##*  | ##&    |

tab 1
